# Supplementary material for: Investigating the Causal Relationship of Gut Microbiota with Psoriasis and Psoriatic Arthritis: A Bidirectional Two-Sample Mendelian Randomization Study.
Source: Preprints.org preprint supplement (doi:10.20944/preprints202306.1726.v1), 2023-06-25
Supplement: Supplementary file 1 [file supplementary]

## Sheet: Supplementary Table 4_Ps_SNPs
	SNP	b	se	p
class	rs11655079	-0.0352817	0.129599	0.78544
class	rs11745923	0.00714964	0.134692	0.957667
class	rs12049045	-0.0115902	0.135353	0.931761
class	rs134366	0.0150304	0.133413	0.9103
class	rs1376754	-0.0377952	0.13115	0.773206
class	rs1515761	-0.0632956	0.104241	0.543716
class	rs182549	0.0935568	0.139112	0.501247
class	rs4945008	-0.0240246	0.134807	0.858554
class	rs6660520	-0.0136342	0.137674	0.921113
class	rs72767435	0.0057229	0.135415	0.96629
class	rs7322849	-0.0386448	0.131921	0.769569
class	rs80083040	-0.053273	0.13097	0.684187
class	rs857444	0.00943385	0.132833	0.943382
class	rs961091	0.0223294	0.128142	0.861665
class	rs140912403	0.213423	0.129811	0.100155
class	rs34569731	0.158207	0.127581	0.214954
class	rs55876211	0.128448	0.128344	0.316919
class	rs62285697	0.177404	0.128033	0.165866
class	rs76784716	0.217411	0.133224	0.102696
class	rs7960664	0.133993	0.124301	0.281046
class	rs9813022	0.148934	0.129079	0.248574
class	rs11110282	-0.0881096	0.119079	0.459346
class	rs11730038	-0.100731	0.120474	0.403087
class	rs12797734	-0.0883929	0.119768	0.460493
class	rs13068444	-0.104689	0.118182	0.37571
class	rs1595463	-0.12025	0.114333	0.292915
class	rs28564647	-0.0713705	0.117014	0.541908
class	rs2952251	-0.0764949	0.118189	0.517486
class	rs34989881	-0.0719118	0.117374	0.540095
class	rs35344081	-0.110612	0.11877	0.351691
class	rs4028634	-0.0207568	0.102777	0.839948
class	rs4459992	-0.0702714	0.117732	0.55059
class	rs57872228	-0.0714186	0.117049	0.541755
class	rs694949	-0.0964865	0.119429	0.419149
class	rs74663707	-0.0628541	0.115215	0.585383
class	rs7666190	-0.149269	0.112093	0.182973
class	rs77558518	-0.095388	0.121694	0.433136
class	rs78938557	-0.104786	0.116439	0.368162
class	rs9581006	-0.136601	0.122609	0.26523
class	rs11146701	-0.13662	0.15066	0.36451
class	rs17343978	-0.0638865	0.136686	0.640216
class	rs2032750	-0.102034	0.153864	0.507237
class	rs4146051	-0.144986	0.156155	0.353162
class	rs4916508	-0.095783	0.151125	0.526211
class	rs55773148	-0.125939	0.156555	0.421143
class	rs62531359	-0.109835	0.154783	0.477947
class	rs62575403	-0.126935	0.156812	0.418244
class	rs72706335	-0.15808	0.159534	0.32174
class	rs73975615	-0.0567161	0.126966	0.655089
class	rs7631304	-0.145378	0.151837	0.338335
class	rs79585701	-0.180715	0.137186	0.18774
class	rs929878	-0.149904	0.150424	0.318986
class	rs11128180	0.0804718	0.142581	0.572485
class	rs1511453	0.113271	0.140695	0.42077
class	rs1928341	0.0826061	0.142972	0.563415
class	rs2321387	0.160317	0.142212	0.259612
class	rs2613606	0.12736	0.142675	0.372039
class	rs320161	0.0546035	0.141982	0.700548
class	rs4033856	0.0942897	0.141619	0.50554
class	rs6087811	0.0782525	0.145427	0.590517
class	rs62395635	0.104687	0.143243	0.464881
class	rs75242906	0.0237625	0.148368	0.872756
class	rs10774377	0.0627159	0.124714	0.615052
class	rs112334273	0.0482645	0.125788	0.701204
class	rs13105690	0.0215917	0.123837	0.861586
class	rs13179700	0.0975381	0.124019	0.431586
class	rs1842454	0.0384788	0.122987	0.75438
class	rs2273429	0.0102228	0.12327	0.933907
class	rs6797343	0.0693574	0.12368	0.574947
class	rs6814436	0.0511384	0.124571	0.681428
class	rs6815608	0.0592466	0.130573	0.650014
class	rs72738886	0.0480738	0.123551	0.697202
class	rs72915163	-0.00445194	0.12382	0.971318
class	rs992074	-0.0115847	0.131188	0.929634
class	rs11250875	-0.101432	0.128378	0.42947
class	rs11656361	-0.0775875	0.130664	0.552651
class	rs12974142	-0.134068	0.126617	0.28967
class	rs13307134	-0.154847	0.126902	0.222387
class	rs1397793	-0.133795	0.127465	0.293874
class	rs1816223	-0.106755	0.127782	0.403467
class	rs240104	-0.0982019	0.129313	0.447607
class	rs2442778	-0.11484	0.128785	0.372543
class	rs3025411	-0.112976	0.12991	0.384492
class	rs34739816	-0.104575	0.127427	0.411837
class	rs67561917	-0.126535	0.129576	0.328801
class	rs719099	-0.155752	0.127703	0.222601
class	rs8010111	-0.085966	0.12996	0.508305
class	rs1035691	-0.0525738	0.137098	0.701367
class	rs11599763	0.0396658	0.156902	0.800418
class	rs17084793	0.0492213	0.153994	0.749248
class	rs17791387	0.0331382	0.154711	0.830396
class	rs2838334	-0.0184748	0.152507	0.90358
class	rs3935584	0.078735	0.144287	0.585284
class	rs4506934	-0.0511776	0.14469	0.723559
class	rs55744759	0.0431077	0.154993	0.780914
class	rs6058181	0.0621763	0.155992	0.690199
class	rs62020470	-0.025489	0.143967	0.85947
class	rs9928243	0.071839	0.148547	0.628661
class	rs1074800	-0.249005	0.134016	0.0631643
class	rs10781552	-0.166972	0.134272	0.21367
class	rs17530232	-0.225198	0.133427	0.09145
class	rs1884466	-0.21839	0.133725	0.102441
class	rs2300774	-0.235926	0.134892	0.08029
class	rs290833	-0.195277	0.134233	0.145736
class	rs35161940	-0.241723	0.134287	0.0718526
class	rs4078432	-0.210515	0.133415	0.114589
class	rs56970041	-0.216274	0.131329	0.0995969
class	rs62504403	-0.240531	0.135344	0.0755374
class	rs7234058	-0.177256	0.135528	0.19091
class	rs7826267	-0.190077	0.132437	0.151224
class	rs8003149	-0.197618	0.134523	0.141824
class	rs11181912	0.151109	0.201277	0.452804
class	rs12404135	0.238697	0.213043	0.262534
class	rs6706173	0.190121	0.21395	0.374206
class	rs75101789	0.293267	0.190134	0.12297
class	rs79795896	0.127328	0.21511	0.553903
class	rs9494710	0.368859	0.192878	0.0558255
class	rs1002941	0.0785306	0.08688	0.36605
class	rs11770843	0.0631356	0.088385	0.475026
class	rs17114848	0.0784022	0.0868581	0.366713
class	rs2031282	0.0631387	0.0870968	0.468498
class	rs2825714	0.0155194	0.0884023	0.860644
class	rs62570196	0.0726165	0.0863932	0.400608
class	rs72640280	0.0170264	0.0882663	0.847038
class	rs77599476	0.0643143	0.0889324	0.469568
class	rs10148250	-0.0108461	0.0866874	0.90043
class	rs10738747	0.00119	0.086538	0.989029
class	rs11150282	-0.0480209	0.0882196	0.586212
class	rs113884518	0.00416186	0.0849644	0.960932
class	rs28678345	-0.0301518	0.0878243	0.731358
class	rs367480	-0.0245834	0.0864796	0.776205
class	rs4129395	-0.00381696	0.0875315	0.965218
class	rs789069	0.00642053	0.0857317	0.940301
class	rs79790072	0.0082853	0.0862715	0.923491
class	rs9864379	0.0803709	0.0909804	0.377027
class	rs10202904	0.064082	0.0772278	0.406664
class	rs10424197	0.0632395	0.0750107	0.399187
class	rs4257531	0.0510311	0.0753575	0.498287
class	rs6508769	0.055384	0.0761203	0.466868
class	rs6776814	0.0790827	0.0725944	0.275987
class	rs73068003	0.0533347	0.0747714	0.475658
class	rs73457410	0.0453274	0.0758137	0.549921
class	rs75208022	0.0796454	0.0787708	0.311967
class	rs894996	0.0402288	0.0763292	0.598163
class	rs10108398	0.0929171	0.131696	0.480472
class	rs11890098	0.0919791	0.131315	0.48365
class	rs12566890	0.0708685	0.129919	0.585422
class	rs17214486	0.0617999	0.12481	0.620492
class	rs2464826	0.080232	0.129483	0.535499
class	rs28537087	0.0776015	0.131536	0.555216
class	rs3768491	0.0847989	0.130256	0.515034
class	rs4885016	0.161652	0.105096	0.124014
class	rs6043847	0.127123	0.11991	0.289074
class	rs72901605	0.1224	0.122003	0.31574
class	rs74603314	0.00342713	0.117134	0.976659
class	rs78169027	0.0958777	0.128392	0.455211
class	rs1135612	0.218728	0.14562	0.133085
class	rs13086907	0.181842	0.142926	0.203274
class	rs1643968	0.228258	0.148103	0.123265
class	rs1649999	0.198988	0.143992	0.166991
class	rs2834062	0.163778	0.132965	0.218046
class	rs4463806	0.159302	0.132573	0.229513
class	rs4722181	0.291037	0.134224	0.0301363
class	rs60274479	0.235596	0.14672	0.108328
class	rs61249479	0.241626	0.147231	0.100769
class	rs71405394	0.193683	0.147687	0.18971
class	rs73232831	0.239237	0.147308	0.104363
class	rs9423647	0.261784	0.137458	0.0568499
class	rs111862613	0.0644973	0.122178	0.597572
class	rs117107102	0.08629	0.126186	0.494081
class	rs11729256	-0.00533957	0.111471	0.961795
class	rs12908520	0.111937	0.11226	0.318703
class	rs2602429	0.0278694	0.114936	0.808411
class	rs4242783	0.0736896	0.120659	0.54138
class	rs4936098	0.058989	0.120772	0.625244
class	rs61779207	0.088352	0.118598	0.456289
class	rs74542928	0.0601176	0.118487	0.611889
class	rs9349825	0.104868	0.111226	0.345763
class	rs941682	0.0538283	0.119131	0.651385
family	rs262812	-0.254972	0.151904	0.0932487
family	rs2933324	-0.184652	0.197536	0.349904
family	rs45497800	-0.082511	0.205745	0.688394
family	rs6589457	-0.206486	0.202243	0.307263
family	rs6923842	-0.169372	0.199352	0.395542
family	rs74540770	-0.159491	0.20409	0.434524
family	rs78702810	0.01845	0.154682	0.905056
family	rs2889192	0.226561	0.14664	0.122341
family	rs34583783	0.228774	0.14508	0.114822
family	rs35011108	0.0934455	0.224096	0.676687
family	rs4073240	0.101918	0.150962	0.499598
family	rs112135816	0.08091	0.138076	0.557888
family	rs1153990	0.0806772	0.14248	0.571235
family	rs147968	0.103737	0.140896	0.46157
family	rs28480294	0.125517	0.140986	0.373318
family	rs4033856	0.116165	0.140137	0.407137
family	rs62191117	0.0769557	0.142727	0.589762
family	rs62395635	0.12733	0.14204	0.370019
family	rs6969323	0.138714	0.140977	0.325143
family	rs74776516	0.0913667	0.140349	0.51505
family	rs7638039	0.110652	0.141816	0.435243
family	rs9537886	0.193422	0.143281	0.177032
family	rs11585893	0.245125	0.180739	0.175025
family	rs13207588	0.266993	0.170847	0.118109
family	rs1340391	0.322227	0.168389	0.0556725
family	rs17619981	0.187744	0.17878	0.293655
family	rs2023437	0.248671	0.17334	0.151404
family	rs66710942	0.264208	0.17201	0.124538
family	rs6795673	0.195137	0.174703	0.264008
family	rs10872669	0.00511398	0.105644	0.961391
family	rs12748533	-0.0265009	0.106301	0.803129
family	rs17043785	0.0437893	0.112182	0.696283
family	rs1850003	0.0256507	0.105763	0.80837
family	rs61508842	-0.0340555	0.10551	0.746869
family	rs738193	-0.0379667	0.107617	0.724241
family	rs78609301	0.00549968	0.107253	0.959104
family	rs941000	-0.0309698	0.107744	0.773777
family	rs10831953	-0.124604	0.111453	0.26357
family	rs12446429	-0.147386	0.114261	0.197085
family	rs13020688	-0.115527	0.112065	0.302592
family	rs182549	-0.0758679	0.129945	0.559324
family	rs4957061	-0.158343	0.112535	0.159412
family	rs540489	-0.142697	0.111603	0.201032
family	rs55888705	-0.191773	0.111336	0.0849853
family	rs6899771	-0.184163	0.112285	0.100975
family	rs7174549	-0.146125	0.112625	0.194477
family	rs7322849	-0.202598	0.113707	0.0747883
family	rs857444	-0.134239	0.112045	0.230888
family	rs10875374	-0.0409508	0.174284	0.814235
family	rs12186080	0.0245062	0.149105	0.869451
family	rs12341505	-0.0748839	0.171435	0.662252
family	rs2795528	-0.11972	0.181289	0.509011
family	rs2817172	-0.00066639	0.163439	0.996747
family	rs4723021	-0.0438104	0.174595	0.801871
family	rs550843	-0.00783824	0.173168	0.963897
family	rs56188186	-0.0724578	0.169868	0.669704
family	rs62397761	-0.0681127	0.175859	0.698523
family	rs881532	-0.15727	0.128651	0.221533
family	rs10517600	-0.0780945	0.094223	0.407202
family	rs10904722	-0.067479	0.0961753	0.482913
family	rs118104867	0.00166826	0.0962127	0.986166
family	rs13409132	-0.0514645	0.0970797	0.596024
family	rs17121075	-0.0698684	0.0964707	0.468916
family	rs2191834	-0.0996411	0.0886331	0.260929
family	rs28691777	-0.0793152	0.0927681	0.39256
family	rs34088226	-0.0387277	0.0934727	0.678639
family	rs55682560	-0.0411094	0.0967744	0.670986
family	rs6588624	-0.0265778	0.0917389	0.772037
family	rs66714985	-0.101078	0.0892907	0.257629
family	rs7226487	-0.0640812	0.0973374	0.510319
family	rs7538034	-0.0460584	0.0959549	0.631228
family	rs7725895	-0.0319487	0.0957537	0.738639
family	rs989682	-0.0627882	0.0969302	0.517136
family	rs11250875	-0.101432	0.128378	0.42947
family	rs11656361	-0.0775875	0.130664	0.552651
family	rs12974142	-0.134068	0.126617	0.28967
family	rs13307134	-0.154847	0.126902	0.222387
family	rs1397793	-0.133795	0.127465	0.293874
family	rs1816223	-0.106755	0.127782	0.403467
family	rs240104	-0.0982019	0.129313	0.447607
family	rs2442778	-0.11484	0.128785	0.372543
family	rs3025411	-0.112976	0.12991	0.384492
family	rs34739816	-0.104575	0.127427	0.411837
family	rs67561917	-0.126535	0.129576	0.328801
family	rs719099	-0.155752	0.127703	0.222601
family	rs8010111	-0.085966	0.12996	0.508305
family	rs112893842	-0.0190152	0.0987856	0.847359
family	rs1582238	-0.0392127	0.10065	0.696836
family	rs17051335	-0.00834642	0.101426	0.934415
family	rs1908593	-0.0371104	0.0995178	0.709222
family	rs4344384	-0.0221337	0.0997784	0.824447
family	rs4677103	-0.087674	0.100259	0.381858
family	rs540220	-0.0543417	0.0997462	0.585891
family	rs55658617	-0.0489069	0.0990379	0.621433
family	rs72731813	-0.00119703	0.0989198	0.990345
family	rs9608282	-0.0315473	0.0973464	0.745883
family	rs9725395	-0.0520523	0.102546	0.611735
family	rs11599763	-0.078712	0.166938	0.637281
family	rs17791387	-0.0821657	0.162679	0.613504
family	rs2838334	-0.159261	0.157477	0.311859
family	rs3935584	-0.0252559	0.156604	0.871879
family	rs4506934	-0.208685	0.160272	0.192893
family	rs6058181	-0.0530782	0.167117	0.75078
family	rs72647048	-0.0720899	0.163707	0.659676
family	rs9928243	-0.0353393	0.157251	0.822188
family	rs11026530	-0.0469823	0.184483	0.798978
family	rs2374342	-0.102165	0.190344	0.591446
family	rs35673018	-0.00644749	0.165172	0.968862
family	rs504442	-0.026831	0.167658	0.872854
family	rs62210023	-0.182793	0.168418	0.277764
family	rs78143293	-0.17443	0.167211	0.296867
family	rs79757635	-0.11458	0.18516	0.536039
family	rs1074800	-0.249005	0.134016	0.0631643
family	rs10781552	-0.166972	0.134272	0.21367
family	rs17530232	-0.225198	0.133427	0.09145
family	rs1884466	-0.21839	0.133725	0.102441
family	rs2300774	-0.235926	0.134892	0.08029
family	rs290833	-0.195277	0.134233	0.145736
family	rs35161940	-0.241723	0.134287	0.0718526
family	rs4078432	-0.210515	0.133415	0.114589
family	rs56970041	-0.216274	0.131329	0.0995969
family	rs62504403	-0.240531	0.135344	0.0755374
family	rs7234058	-0.177256	0.135528	0.19091
family	rs7826267	-0.190077	0.132437	0.151224
family	rs8003149	-0.197618	0.134523	0.141824
family	rs10759623	-0.114402	0.0719631	0.111896
family	rs11547158	-0.128647	0.0706136	0.0684783
family	rs17379710	-0.132568	0.0701165	0.0586668
family	rs2155352	-0.104661	0.0711712	0.141411
family	rs2156611	-0.125263	0.069933	0.0732628
family	rs3733511	-0.169456	0.0703098	0.0159465
family	rs488164	-0.13185	0.0699691	0.0595105
family	rs697771	-0.104359	0.0703012	0.137688
family	rs10404377	-0.15058	0.181419	0.406532
family	rs118170811	-0.260223	0.18814	0.166625
family	rs482905	-0.137229	0.183113	0.453604
family	rs6501525	-0.231404	0.192121	0.228409
family	rs66753613	-0.237227	0.189886	0.211552
family	rs6797051	-0.341639	0.180428	0.0582926
family	rs7514702	-0.233689	0.188464	0.214987
family	rs10402491	-0.0232252	0.122433	0.849547
family	rs11139361	-0.081001	0.120895	0.502851
family	rs112040820	-0.0358954	0.122667	0.769808
family	rs11841382	-0.0369436	0.121327	0.760751
family	rs11979110	-0.0211148	0.122325	0.862956
family	rs1205443	0.0185876	0.121102	0.878014
family	rs12760724	-0.0610988	0.120776	0.612937
family	rs13005175	-0.0756429	0.120101	0.528807
family	rs2159863	-0.0363111	0.122183	0.766324
family	rs2910921	-0.060572	0.122223	0.620186
family	rs3127230	-0.0307646	0.122313	0.801409
family	rs35524804	0.0352538	0.121493	0.771684
family	rs7359994	-0.0322473	0.122903	0.793028
family	rs79086868	-0.0289458	0.122329	0.812951
family	rs959845	-0.0210221	0.121851	0.863027
family	rs9929145	-0.0535669	0.122494	0.661893
family	rs1530559	0.0807034	0.093737	0.389262
family	rs16861661	0.0413043	0.0965448	0.668778
family	rs62314653	0.0785062	0.0946138	0.406678
family	rs74599091	0.0319145	0.0912206	0.726443
family	rs768253	0.00927252	0.0940344	0.92145
family	rs77478751	0.0584855	0.10766	0.586963
family	rs921925	0.0874982	0.0944533	0.354257
family	rs9345899	0.0523895	0.0936563	0.575903
family	rs10202904	0.064082	0.0772278	0.406664
family	rs10424197	0.0632395	0.0750107	0.399187
family	rs4257531	0.0510311	0.0753575	0.498287
family	rs6508769	0.055384	0.0761203	0.466868
family	rs6776814	0.0790827	0.0725944	0.275987
family	rs73068003	0.0533347	0.0747714	0.475658
family	rs73457410	0.0453274	0.0758137	0.549921
family	rs75208022	0.0796454	0.0787708	0.311967
family	rs894996	0.0402288	0.0763292	0.598163
family	rs111966731	0.125314	0.0656804	0.0563989
family	rs11246212	0.0975481	0.0645039	0.130462
family	rs12002250	0.0927394	0.0638216	0.146195
family	rs1569853	0.114748	0.0643598	0.0746013
family	rs17138946	0.0991051	0.064522	0.124541
family	rs36057338	0.10426	0.0633008	0.0995452
family	rs4428215	0.124553	0.0653441	0.0566354
family	rs561239	0.11054	0.0640881	0.0845618
family	rs6000536	0.130712	0.0642139	0.0417932
family	rs62435498	0.112099	0.0653512	0.0862853
family	rs736744	0.0895025	0.0650617	0.168928
family	rs7993559	0.115138	0.0643323	0.0734954
family	rs80330081	0.143609	0.0656777	0.0287735
family	rs934049	0.0999044	0.0642458	0.119938
family	rs10965428	-0.00703453	0.0839949	0.933256
family	rs111582866	-4.00946e-05	0.0844541	0.999621
family	rs12050685	-0.00430398	0.0844289	0.959343
family	rs16970009	-0.0422541	0.079637	0.595707
family	rs4822728	-0.0210657	0.0823504	0.798101
family	rs6972479	0.0212498	0.0802274	0.79111
family	rs72756943	-0.0139607	0.0841904	0.868296
family	rs73139353	0.0120415	0.0910705	0.894809
family	rs76022354	0.0292168	0.084436	0.729325
family	rs78909003	0.0230789	0.0866186	0.789898
family	rs9382510	-0.0265114	0.0821475	0.746901
family	rs9895850	-0.00970745	0.085026	0.909103
family	rs9938097	-0.00962894	0.0847838	0.909578
family	rs117452796	-0.099649	0.137127	0.467415
family	rs12144792	-0.115093	0.126248	0.361956
family	rs12634826	-0.0410009	0.119393	0.731289
family	rs12992764	-0.0995025	0.130542	0.445927
family	rs150600492	-0.149744	0.112177	0.181914
family	rs35703006	-0.0476622	0.122163	0.696423
family	rs4990837	-0.103708	0.13132	0.429685
family	rs75430375	-0.126415	0.121458	0.297965
family	rs75898026	-0.0335593	0.112863	0.766203
family	rs10805326	-0.0404068	0.103771	0.696991
family	rs117020988	-0.00253127	0.112817	0.982099
family	rs12377846	-0.0565495	0.109176	0.604482
family	rs12986312	-0.0654475	0.103875	0.528655
family	rs1467258	-0.0881342	0.10436	0.398378
family	rs1520207	-0.0915653	0.103883	0.378088
family	rs4692811	-0.0875551	0.104926	0.404029
family	rs59865771	-0.063455	0.10411	0.542194
family	rs61841503	-0.110119	0.105092	0.294716
family	rs6721459	-0.0584951	0.1036	0.57233
family	rs76982728	-0.0644403	0.102271	0.528632
family	rs77540684	-0.0541746	0.105244	0.606726
family	rs9573937	-0.0585109	0.103773	0.572867
family	rs10762312	-0.26326	0.170941	0.123545
family	rs10858364	0.0158467	0.188795	0.933107
family	rs17065783	-0.127414	0.233035	0.584545
family	rs1980561	-0.179984	0.224623	0.422975
family	rs35233670	-0.133351	0.235131	0.570624
family	rs35961441	-0.111331	0.229901	0.628204
family	rs6953849	-0.0320051	0.230669	0.889649
family	rs7330827	-0.0747461	0.235041	0.750475
family	rs864093	-0.0756676	0.230452	0.742651
family	rs12118202	-0.172145	0.107138	0.108107
family	rs13069367	-0.205889	0.106428	0.0530463
family	rs148376875	-0.152248	0.107488	0.156653
family	rs2206482	-0.223156	0.106774	0.0366192
family	rs2278540	-0.195316	0.10646	0.0665599
family	rs34660375	-0.200612	0.106924	0.0606268
family	rs3758087	-0.200543	0.106121	0.0587895
family	rs3860225	-0.180121	0.105875	0.0888938
family	rs4493272	-0.196672	0.107461	0.0672259
family	rs4685827	-0.208744	0.107111	0.051312
family	rs7252711	-0.16096	0.105626	0.127541
family	rs7975087	-0.152341	0.105582	0.149059
family	rs912860	-0.176477	0.108875	0.105037
family	rs9586501	-0.148161	0.106332	0.163502
family	rs9958960	-0.188827	0.108349	0.0813752
family	rs1035406	0.0474068	0.0802862	0.554874
family	rs11591293	0.0546823	0.0803457	0.496132
family	rs13336560	0.038445	0.079979	0.630738
family	rs1549633	0.0657094	0.0796761	0.409538
family	rs1923415	0.0715792	0.0792249	0.366263
family	rs3754624	0.0456053	0.0803918	0.570519
family	rs4278423	0.0527398	0.0789589	0.504172
family	rs55876211	0.0323968	0.08081	0.688494
family	rs61933850	0.102663	0.0842359	0.222936
family	rs6679026	0.0642678	0.0799203	0.421311
family	rs7001029	0.0721765	0.0799057	0.366382
family	rs72714493	0.0832206	0.0793274	0.294142
family	rs74354280	0.0230972	0.0810281	0.775605
family	rs76784716	0.065865	0.0814144	0.41851
family	rs9813022	0.0411267	0.0809984	0.611631
family	rs10217435	0.00698586	0.127391	0.956267
family	rs10832801	0.0203222	0.123426	0.869219
family	rs1939881	0.0274313	0.122197	0.82238
family	rs2447496	-0.00337423	0.125039	0.978471
family	rs2833282	-0.0268565	0.121423	0.824951
family	rs36021379	-0.00116555	0.125068	0.992564
family	rs4264350	0.0145776	0.125184	0.907296
family	rs59663348	-0.0249913	0.121423	0.836931
family	rs62532512	0.00800953	0.12531	0.949036
family	rs6744030	-0.0917545	0.111316	0.409788
family	rs6837275	-0.00679235	0.125395	0.956802
family	rs74474130	0.00469807	0.125502	0.970139
family	rs77885767	0.0690432	0.115233	0.549063
family	rs9389714	-0.00938439	0.122306	0.938839
family	rs9578457	0.0447413	0.121287	0.71221
family	rs9603208	0.0124551	0.124878	0.920552
family	rs10093275	-0.0558761	0.189143	0.767675
family	rs10166469	-0.0133071	0.200811	0.947166
family	rs1612733	-0.0116831	0.202024	0.953884
family	rs17376049	-0.0711073	0.183588	0.69852
family	rs2113833	0.0395289	0.203054	0.84565
family	rs3009418	-0.0100495	0.198696	0.959663
family	rs55793120	0.171958	0.139469	0.217596
family	rs56199908	-0.0722866	0.219972	0.742446
family	rs76724913	0.0311877	0.20095	0.876662
family	rs10028567	0.046007	0.140611	0.743522
family	rs11110281	0.0182274	0.139058	0.895714
family	rs16950051	-0.0349405	0.138095	0.800254
family	rs2370083	-0.0153631	0.135342	0.909624
family	rs2952251	0.0398474	0.137188	0.771465
family	rs35344081	-0.0200729	0.138359	0.884649
family	rs57646748	-0.00609877	0.133992	0.963696
family	rs6806351	0.0073852	0.137656	0.957214
family	rs77968078	0.00839009	0.136704	0.951061
family	rs7916711	-0.0280674	0.142536	0.843895
family	rs957755	0.0326354	0.136036	0.810406
family	rs111810795	-0.0271348	0.0877044	0.757025
family	rs114889439	-0.0479192	0.0919015	0.602075
family	rs11700976	-0.0478499	0.0876137	0.584966
family	rs12186441	-0.103063	0.0907537	0.256112
family	rs12668619	-0.047894	0.0877164	0.58506
family	rs12741784	-0.0795727	0.0878833	0.365234
family	rs1442060	-0.0630231	0.0876554	0.472149
family	rs1693340	-0.0564497	0.0871228	0.517028
family	rs2175069	-0.0612586	0.0876494	0.484611
family	rs2561116	-0.048645	0.0869524	0.575859
family	rs2585520	-0.0392019	0.0867394	0.651304
family	rs4263802	-0.0396335	0.0874568	0.650421
family	rs4461038	-0.058329	0.0876272	0.505635
family	rs4797169	-0.0508184	0.0875829	0.561758
family	rs61264131	-0.0630371	0.0967585	0.514731
family	rs6692542	-0.0361713	0.0876401	0.679807
family	rs6909981	-0.0729594	0.0870866	0.402154
family	rs79535861	-0.0559309	0.0881731	0.525865
family	rs9345168	-0.0400533	0.0876374	0.647646
family	rs111862613	0.0644135	0.122219	0.598169
family	rs117107102	0.0862115	0.126231	0.494629
family	rs11729256	-0.00545783	0.111501	0.96096
family	rs12908520	0.111898	0.112293	0.319016
family	rs2602429	0.0278351	0.114946	0.808658
family	rs4242783	0.0735821	0.120677	0.542031
family	rs4936098	0.0589038	0.120807	0.625844
family	rs61779207	0.0883042	0.118644	0.456707
family	rs74542928	0.0600366	0.11852	0.61247
family	rs9349825	0.104831	0.111259	0.346078
family	rs941682	0.0537401	0.119169	0.652021
family	rs11671100	-0.0440061	0.0621013	0.478561
family	rs11764871	-0.0461298	0.061475	0.453024
family	rs2944282	-0.0281937	0.0611891	0.644969
family	rs34962571	-0.0444369	0.0612167	0.467904
family	rs4396289	-0.0305937	0.0607453	0.614515
family	rs61702987	-0.0331069	0.0602433	0.582626
family	rs62570196	-0.033702	0.0605462	0.577778
family	rs6545794	-0.0643369	0.0621024	0.300211
family	rs67832247	-0.00994024	0.0613225	0.871229
family	rs7077363	-0.030989	0.0611073	0.612068
family	rs7314815	-0.03678	0.0606585	0.544286
family	rs7627405	-0.0361708	0.0608976	0.552538
genus1	rs2715439	0.090468	0.111236	0.416047
genus1	rs34583783	0.107743	0.108673	0.321468
genus1	rs35011108	0.0132946	0.123953	0.914586
genus1	rs4073240	0.0329467	0.110902	0.766406
genus1	rs4146653	0.10552	0.110051	0.337644
genus1	rs71315246	0.124128	0.109711	0.257883
genus1	rs7915461	0.0922291	0.116211	0.427406
genus1	rs11604400	0.188095	0.117364	0.109008
genus1	rs13231526	0.0789089	0.120963	0.514183
genus1	rs2717140	0.10591	0.119154	0.374083
genus1	rs55719207	0.14724	0.118473	0.213935
genus1	rs6664405	0.154757	0.118119	0.190137
genus1	rs7680684	0.189554	0.121262	0.118012
genus1	rs9490822	0.172226	0.119667	0.15009
genus1	rs9915817	0.124061	0.118438	0.294879
genus1	rs10794359	-0.0473294	0.108342	0.66222
genus1	rs1563175	-0.1177	0.0870392	0.176289
genus1	rs17012738	-0.0517784	0.10833	0.632671
genus1	rs17096874	-0.021463	0.104167	0.836756
genus1	rs356049	-0.0740124	0.103369	0.473989
genus1	rs4244069	-0.0392217	0.107581	0.715425
genus1	rs4506496	-0.0103321	0.0958437	0.914153
genus1	rs712981	-0.109499	0.0960139	0.254099
genus1	rs79598899	-0.0580275	0.107085	0.587898
genus1	rs816292	-0.0745075	0.109052	0.494463
genus1	rs9299345	-0.0366642	0.104	0.724433
genus1	rs10502061	0.139826	0.130601	0.284335
genus1	rs2014785	0.0939222	0.130024	0.470083
genus1	rs2396460	0.0431874	0.130108	0.739937
genus1	rs2804244	0.12609	0.130258	0.333045
genus1	rs3900776	0.124198	0.127378	0.329546
genus1	rs60983350	0.0782607	0.129873	0.546777
genus1	rs62157625	0.0665445	0.131765	0.613543
genus1	rs62215703	0.154645	0.130631	0.236481
genus1	rs6474958	0.143425	0.129105	0.266603
genus1	rs6726833	0.124708	0.129275	0.334708
genus1	rs6854026	0.141411	0.130015	0.27675
genus1	rs7193624	0.108691	0.128234	0.39666
genus1	rs78735375	0.138956	0.130775	0.287983
genus1	rs1007475	-0.064147	0.0516556	0.214303
genus1	rs11761679	-0.0837856	0.0517133	0.10519
genus1	rs142855850	-0.0950372	0.0521544	0.0684207
genus1	rs16934069	-0.087398	0.0515485	0.0899896
genus1	rs16941336	-0.0868852	0.0517139	0.0929353
genus1	rs17163238	-0.0761397	0.0518301	0.141825
genus1	rs4537857	-0.0874386	0.0520395	0.0929121
genus1	rs486484	-0.0818233	0.0517009	0.113506
genus1	rs4928024	-0.0873685	0.0526606	0.0970986
genus1	rs72723662	-0.0886636	0.0533921	0.0967914
genus1	rs74622183	-0.0911657	0.051927	0.0791478
genus1	rs77356209	-0.0794567	0.0512594	0.12112
genus1	rs7752361	-0.0436763	0.0520887	0.40175
genus1	rs7763512	-0.0801694	0.0520563	0.123548
genus1	rs9349693	-0.0917603	0.0517158	0.0760107
genus1	rs12404911	-0.107663	0.143583	0.453357
genus1	rs212393	0.0440436	0.113541	0.698084
genus1	rs73128290	-0.0159142	0.165137	0.923227
genus1	rs7742829	-0.117615	0.138015	0.394109
genus1	rs10461257	0.0146173	0.200738	0.941951
genus1	rs17081797	-0.0269497	0.194088	0.889567
genus1	rs62132810	-0.167786	0.176741	0.342453
genus1	rs62190261	0.00279809	0.202353	0.988967
genus1	rs62467127	0.044368	0.180334	0.805657
genus1	rs73952017	0.0724729	0.185888	0.69663
genus1	rs78521377	0.0648002	0.176907	0.714145
genus1	rs892686	-0.0143262	0.200227	0.94296
genus1	rs10506058	-0.0712335	0.0834467	0.393304
genus1	rs1942371	-0.0927607	0.099327	0.350359
genus1	rs40656	-0.125012	0.109974	0.255649
genus1	rs4869133	-0.194014	0.0965473	0.0444812
genus1	rs61267978	-0.108243	0.104076	0.29832
genus1	rs6577484	-0.155553	0.100484	0.121614
genus1	rs6890185	-0.153372	0.104146	0.140841
genus1	rs10890671	-0.0892315	0.180399	0.620858
genus1	rs11597285	-0.153897	0.178987	0.389885
genus1	rs1496626	-0.138695	0.180051	0.441117
genus1	rs149807560	-0.205288	0.156072	0.188396
genus1	rs2103510	-0.101184	0.180904	0.575941
genus1	rs62448871	0.00800749	0.154625	0.958699
genus1	rs73052258	-0.173918	0.169537	0.304968
genus1	rs75672793	-0.0867197	0.175466	0.621147
genus1	rs9541268	-0.128706	0.183967	0.484167
genus1	rs112893842	0.0117822	0.111882	0.916131
genus1	rs1582238	-0.0135639	0.114347	0.905576
genus1	rs2892880	-0.0259624	0.113032	0.818332
genus1	rs4344384	0.00803851	0.113155	0.943366
genus1	rs4677103	-0.0762053	0.113719	0.502782
genus1	rs55658617	-0.0266848	0.11174	0.811251
genus1	rs72731813	0.0329822	0.111585	0.76755
genus1	rs9608282	-0.00573717	0.109697	0.958289
genus1	rs9725395	-0.0290162	0.117075	0.804256
genus1	rs12031543	-0.0723165	0.143653	0.614677
genus1	rs13066142	-0.0561995	0.139334	0.686695
genus1	rs16863365	-0.0229228	0.128827	0.858774
genus1	rs2032031	-0.132074	0.1152	0.251596
genus1	rs2590913	-0.0514591	0.139328	0.711877
genus1	rs2853179	-0.0173507	0.135211	0.897894
genus1	rs4797774	0.0403116	0.119861	0.736629
genus1	rs6580353	-0.0810982	0.131356	0.536977
genus1	rs72647089	-0.031303	0.135584	0.817412
genus1	rs10138457	-0.0785944	0.118466	0.507052
genus1	rs10938938	-0.0945771	0.116587	0.417241
genus1	rs11071887	-0.100968	0.117639	0.390734
genus1	rs11166701	-0.0222887	0.118412	0.850697
genus1	rs2314294	-0.0949085	0.117115	0.417719
genus1	rs2435610	-0.0412838	0.116574	0.723233
genus1	rs4747450	-0.0627008	0.116483	0.590381
genus1	rs4753063	-0.0633732	0.117159	0.588564
genus1	rs75416973	-0.0366351	0.117301	0.754801
genus1	rs764177	-0.0356534	0.11687	0.760314
genus1	rs76680460	-0.0003079	0.118319	0.997924
genus1	rs112205261	-0.1241	0.107845	0.249846
genus1	rs13070736	-0.15116	0.0983184	0.124182
genus1	rs1784446	-0.17513	0.0837038	0.0364151
genus1	rs2223081	-0.111212	0.106605	0.296851
genus1	rs2240838	-0.0693119	0.0967285	0.473645
genus1	rs3851328	-0.0622845	0.0889176	0.483631
genus1	rs4985746	-0.115629	0.103749	0.265061
genus1	rs6430926	-0.0908342	0.102425	0.375166
genus1	rs67490567	-0.121748	0.106618	0.253493
genus1	rs76663501	-0.12448	0.104129	0.231913
genus1	rs11027642	-0.0206726	0.0804716	0.797262
genus1	rs11079158	-0.0185096	0.0798113	0.816603
genus1	rs11938607	-0.0319513	0.0800151	0.68966
genus1	rs12257723	-0.0386257	0.0803777	0.630835
genus1	rs12710729	-0.0566549	0.0798545	0.478029
genus1	rs13258851	-0.0468522	0.080988	0.562921
genus1	rs1508033	-0.0706325	0.0799106	0.376754
genus1	rs1553971	-0.0196222	0.0815262	0.809799
genus1	rs2683098	-0.0244022	0.0802643	0.761111
genus1	rs3812426	-0.0464171	0.0793528	0.558584
genus1	rs4462860	-0.0293591	0.0805807	0.715601
genus1	rs10098492	0.000829433	0.128974	0.994869
genus1	rs114731706	-0.0108744	0.129635	0.933148
genus1	rs2051957	-0.00783793	0.130474	0.952098
genus1	rs3017103	-0.0292357	0.133747	0.82697
genus1	rs73331712	-0.00279575	0.147665	0.984895
genus1	rs77655283	0.0735241	0.130618	0.573507
genus1	rs10147907	0.263892	0.0770673	0.00061665
genus1	rs11818408	0.220073	0.078204	0.00489157
genus1	rs11876297	0.283996	0.079588	0.000359258
genus1	rs151257695	0.245858	0.0786199	0.00176497
genus1	rs1768152	0.241849	0.0766178	0.0015964
genus1	rs2733072	0.23007	0.0787798	0.00349564
genus1	rs3771393	0.193575	0.0782428	0.0133599
genus1	rs6934739	0.238163	0.0783848	0.00237848
genus1	rs7104872	0.236855	0.0767228	0.00202079
genus1	rs10248854	0.219497	0.162425	0.176575
genus1	rs10797540	0.16907	0.161762	0.29594
genus1	rs143694765	0.172422	0.162827	0.28963
genus1	rs2884897	0.149546	0.160706	0.352085
genus1	rs314726	0.134795	0.16288	0.407911
genus1	rs35398954	0.190812	0.170153	0.262111
genus1	rs59427698	0.148929	0.159741	0.351174
genus1	rs62547233	0.208106	0.161079	0.196375
genus1	rs10439674	0.135805	0.108479	0.210607
genus1	rs167879	0.150882	0.108574	0.164628
genus1	rs1864685	0.133767	0.10881	0.218934
genus1	rs2025938	0.144925	0.108686	0.182392
genus1	rs206581	0.147419	0.108562	0.174489
genus1	rs2132128	0.155997	0.108495	0.150482
genus1	rs3303	0.178861	0.108519	0.0993115
genus1	rs4378146	0.173505	0.109464	0.112957
genus1	rs60254196	0.113429	0.108835	0.29731
genus1	rs62187631	0.153756	0.109766	0.161286
genus1	rs62353480	0.15121	0.109297	0.16652
genus1	rs6515626	0.165619	0.112285	0.140214
genus1	rs704418	0.131689	0.108829	0.226261
genus1	rs73103914	0.178191	0.108102	0.0992786
genus1	rs792108	0.192354	0.108952	0.0774802
genus1	rs8028026	0.164366	0.10845	0.129622
genus1	rs8063430	0.108609	0.10839	0.316332
genus1	rs9905659	0.161327	0.108658	0.137616
genus1	rs13412653	-0.0430534	0.0719385	0.549523
genus1	rs16955299	-0.0176331	0.0728807	0.808823
genus1	rs322296	-0.0403078	0.0715695	0.5733
genus1	rs35042269	-0.010809	0.0708063	0.87867
genus1	rs3765837	-0.0290304	0.072777	0.68997
genus1	rs4596722	-0.033058	0.0730878	0.651049
genus1	rs72714787	0.0258769	0.070709	0.714393
genus1	rs72939513	-0.0442562	0.0705457	0.530436
genus1	rs7294633	-0.0534655	0.0702114	0.446363
genus1	rs768830	-0.0634108	0.0696148	0.362358
genus1	rs10262702	-0.0155141	0.0923638	0.866609
genus1	rs11258178	0.00200458	0.0929418	0.982792
genus1	rs12226153	-0.0220539	0.0905619	0.807601
genus1	rs17067892	-0.00711968	0.0923953	0.938578
genus1	rs1859797	0.0104456	0.0923445	0.909939
genus1	rs2276760	-0.023966	0.0921834	0.794878
genus1	rs2731794	-0.0203383	0.0910433	0.823231
genus1	rs2930225	-0.00563295	0.0924945	0.951439
genus1	rs4113676	0.0159421	0.0916326	0.861882
genus1	rs4784055	0.054497	0.0941996	0.562908
genus1	rs62240188	-0.00513006	0.0940507	0.9565
genus1	rs6934519	-0.0281895	0.0923903	0.76028
genus1	rs716604	0.0187418	0.0932474	0.840706
genus1	rs7170984	0.00502622	0.0922608	0.956554
genus1	rs72982915	-0.0278531	0.0952578	0.769983
genus1	rs9823439	-0.0118897	0.0921448	0.897331
genus1	rs10093861	0.0468187	0.126903	0.712179
genus1	rs1254846	0.0663937	0.127054	0.601278
genus1	rs1363769	-0.0469155	0.116599	0.687414
genus1	rs2322265	0.0861133	0.11271	0.444853
genus1	rs2862811	0.0191162	0.1292	0.882376
genus1	rs35035870	-0.0290072	0.125856	0.81772
genus1	rs3999074	-0.00239689	0.126329	0.984862
genus1	rs4452603	0.0257077	0.129476	0.842613
genus1	rs7249113	0.0433885	0.129399	0.737392
genus1	rs72793667	0.0482771	0.123114	0.69496
genus1	rs9308097	0.0321552	0.129472	0.803859
genus1	rs9788306	-0.0201573	0.120319	0.866951
genus1	rs12131224	-0.0032188	0.103082	0.97509
genus1	rs2050911	0.0120277	0.109719	0.912708
genus1	rs2371284	0.0869166	0.108845	0.424559
genus1	rs437876	0.0497897	0.118213	0.673618
genus1	rs4981345	0.0636973	0.115785	0.582226
genus1	rs573933	0.0633557	0.116204	0.585609
genus1	rs62496417	0.042501	0.115742	0.713468
genus1	rs7341608	0.0633042	0.114143	0.579164
genus1	rs74034332	0.00334515	0.110394	0.975826
genus1	rs78848836	0.0420883	0.117477	0.720141
genus1	rs9403580	0.0737567	0.115573	0.523355
genus1	rs985416	0.121106	0.0980147	0.216609
genus1	rs10741777	0.0380734	0.090066	0.672494
genus1	rs10793103	0.108929	0.0910156	0.231379
genus1	rs10801803	0.0647935	0.0890536	0.466871
genus1	rs13024781	0.0662146	0.0887823	0.455784
genus1	rs57091572	0.055023	0.0882725	0.533067
genus1	rs61944774	0.058903	0.0887749	0.507004
genus1	rs62277846	0.0485012	0.0889121	0.585412
genus1	rs67078837	0.0392195	0.0892342	0.66029
genus1	rs75356640	0.102708	0.0899718	0.253637
genus1	rs955844	0.0428619	0.088585	0.628492
genus1	rs12693845	-0.00618049	0.0902314	0.945391
genus1	rs1530559	-0.00964629	0.0904537	0.915072
genus1	rs16861661	-0.0497668	0.0918508	0.587941
genus1	rs62314653	-0.0131883	0.0915183	0.885417
genus1	rs7399658	-0.00150135	0.0907532	0.986801
genus1	rs768253	-0.0767971	0.090355	0.395354
genus1	rs77478751	-0.0567906	0.102378	0.57909
genus1	rs921925	-0.00568529	0.0905888	0.949958
genus1	rs11620597	-0.1892	0.139014	0.173508
genus1	rs1187983	-0.186858	0.143133	0.191727
genus1	rs146541147	-0.132533	0.123831	0.284497
genus1	rs2724813	-0.155602	0.144844	0.282699
genus1	rs2842896	-0.194177	0.144923	0.180291
genus1	rs2863363	-0.225898	0.134766	0.0936942
genus1	rs3125832	-0.180174	0.142852	0.207214
genus1	rs61884471	-0.268841	0.132502	0.0424629
genus1	rs72948274	-0.116588	0.127867	0.361879
genus1	rs8006832	-0.22663	0.134383	0.0917078
genus1	rs115602804	0.127564	0.307469	0.678226
genus1	rs4236095	-0.198078	0.201159	0.32478
genus1	rs60884758	0.11023	0.284054	0.697971
genus1	rs6657302	-0.0700223	0.319973	0.826776
genus1	rs7298818	-0.0502522	0.328696	0.87849
genus1	rs10031059	-0.0890295	0.0738842	0.228209
genus1	rs11001941	-0.044138	0.0745155	0.553628
genus1	rs12069354	-0.0680106	0.0723517	0.347217
genus1	rs2054133	-0.0709631	0.0725985	0.328335
genus1	rs36121075	-0.0287144	0.0740708	0.698266
genus1	rs413827	-0.0608361	0.0731886	0.405848
genus1	rs5770862	-0.0440068	0.0731987	0.547709
genus1	rs6918730	-0.0780323	0.071448	0.274765
genus1	rs7033353	-0.0347873	0.0729218	0.633327
genus1	rs72850165	-0.0717274	0.0717998	0.317799
genus1	rs74592222	-0.0414873	0.0727939	0.568726
genus1	rs77681628	-0.0925709	0.0744322	0.213612
genus1	rs10279978	0.151506	0.112968	0.179876
genus1	rs11221428	0.168021	0.113548	0.138944
genus1	rs16843578	0.182695	0.110487	0.098221
genus1	rs28603357	0.194985	0.113434	0.0856262
genus1	rs34302036	0.148354	0.112479	0.187187
genus1	rs61841503	0.152364	0.113821	0.180692
genus1	rs62504452	0.180116	0.111708	0.106877
genus1	rs7109293	0.181656	0.113146	0.108383
genus1	rs75200530	0.163717	0.114091	0.151295
genus1	rs75987356	0.174093	0.115022	0.130136
genus1	rs77702691	0.189831	0.112306	0.0909684
genus1	rs9389266	0.243812	0.112562	0.0303096
genus1	rs9567264	0.21509	0.112523	0.0559371
genus1	rs116969552	0.0727857	0.114361	0.524479
genus1	rs11992182	0.0671144	0.114547	0.557934
genus1	rs2548459	-0.0016849	0.109938	0.987772
genus1	rs35362464	0.0766689	0.112265	0.494654
genus1	rs61060922	0.0798699	0.113253	0.480666
genus1	rs663262	0.0161804	0.109078	0.882076
genus1	rs67479537	0.0966523	0.109348	0.376752
genus1	rs71414120	-0.00194817	0.116885	0.986702
genus1	rs72991535	0.0359912	0.111927	0.747786
genus1	rs73176030	0.0608768	0.11509	0.59684
genus1	rs77193512	0.066461	0.116682	0.568957
genus1	rs792058	0.0724739	0.114209	0.525709
genus1	rs79968172	0.0704377	0.114548	0.538607
genus1	rs9555756	0.0768253	0.110902	0.488477
genus1	rs11241747	0.090992	0.11921	0.44529
genus1	rs11586410	0.132374	0.118581	0.264286
genus1	rs12642039	0.0937221	0.119857	0.434246
genus1	rs12731	0.075598	0.118979	0.525175
genus1	rs13087692	0.138605	0.116783	0.235284
genus1	rs136761	0.0685164	0.119052	0.564943
genus1	rs147475196	0.0304982	0.123593	0.805091
genus1	rs35559912	0.0606394	0.118462	0.60873
genus1	rs4814689	0.0485937	0.115623	0.674283
genus1	rs5994253	0.125989	0.117464	0.283461
genus1	rs62027366	0.0916762	0.119306	0.442242
genus1	rs6681678	0.112707	0.114535	0.325096
genus1	rs7573569	0.057775	0.116696	0.620537
genus1	rs10490280	0.0326962	0.114832	0.775851
genus1	rs11243416	-0.0218819	0.123172	0.858995
genus1	rs11613919	-0.0404325	0.122132	0.740602
genus1	rs16959793	0.00625785	0.126174	0.960444
genus1	rs2523124	0.0334343	0.115079	0.771408
genus1	rs3013089	-0.0232543	0.12432	0.851619
genus1	rs4452755	-0.0138572	0.126682	0.912896
genus1	rs4532474	0.03554	0.115872	0.759058
genus1	rs646327	-0.0794655	0.113837	0.485138
genus1	rs6759615	-0.0124022	0.126971	0.922189
genus1	rs73341549	-0.035783	0.129399	0.782138
genus1	rs78720113	0.0162633	0.124541	0.896103
genus1	rs10976229	0.0504059	0.111913	0.652421
genus1	rs11961899	0.103193	0.111492	0.354674
genus1	rs12125734	0.0770163	0.118441	0.515531
genus1	rs2248146	0.0467355	0.111035	0.673821
genus1	rs3800154	0.0434895	0.111288	0.695958
genus1	rs511258	0.102077	0.110493	0.355577
genus1	rs550351	0.0868027	0.118013	0.462013
genus1	rs6769553	0.0338536	0.109692	0.757607
genus1	rs7569771	0.0855393	0.115696	0.459698
genus1	rs872501	0.0599919	0.113777	0.598001
genus1	rs9818949	0.152099	0.103602	0.142077
genus1	rs10873449	-0.0449807	0.130832	0.730994
genus1	rs10937802	-0.0406719	0.130713	0.755683
genus1	rs10950694	-0.0566402	0.129885	0.662779
genus1	rs114279581	-0.103576	0.12494	0.407101
genus1	rs12288512	-0.0878489	0.119495	0.462237
genus1	rs12458218	-0.00743021	0.125943	0.952955
genus1	rs2893871	-0.0273202	0.129569	0.833001
genus1	rs34781347	-0.0604771	0.141143	0.668302
genus1	rs55793120	0.0448551	0.105179	0.669769
genus1	rs72776570	-0.0288583	0.130624	0.82515
genus1	rs7449320	-0.0403998	0.130948	0.757687
genus1	rs7555878	-0.0485237	0.130269	0.70953
genus1	rs7586445	-0.0347162	0.131207	0.791324
genus1	rs898577	0.000877862	0.124589	0.994378
genus1	rs113006825	0.0422327	0.085759	0.622395
genus1	rs12508214	0.0816782	0.0854753	0.339286
genus1	rs138460696	0.0786843	0.0855325	0.357607
genus1	rs1550196	0.0802898	0.0860218	0.350631
genus1	rs2058609	0.10312	0.0855254	0.227925
genus1	rs2192926	0.0861981	0.0865874	0.319492
genus1	rs4079028	0.0658365	0.0860434	0.44418
genus1	rs4708333	0.0473611	0.086128	0.582394
genus1	rs6952765	0.0468099	0.0851029	0.582293
genus1	rs758191	0.0508986	0.0893245	0.568802
genus1	rs78410648	0.107511	0.0857428	0.209885
genus1	rs9558661	0.100093	0.0854055	0.241207
genus1	rs12597105	0.0225288	0.181755	0.901354
genus1	rs2820282	-0.0654733	0.179166	0.714787
genus1	rs682403	0.071966	0.155338	0.643159
genus1	rs6958419	-0.104702	0.154544	0.498094
genus1	rs73218807	0.0716587	0.206749	0.728893
genus1	rs7441445	-0.0608341	0.180552	0.736166
genus1	rs10167839	-0.0294468	0.127944	0.817972
genus1	rs11783695	0.00462997	0.128739	0.971311
genus1	rs17781867	-0.009905	0.128159	0.938396
genus1	rs3819978	-0.0426704	0.130687	0.74404
genus1	rs6105066	0.0567408	0.128869	0.659721
genus1	rs6493760	0.027824	0.128216	0.828201
genus1	rs7117576	0.014268	0.127498	0.910896
genus1	rs7583465	0.0112999	0.128546	0.929951
genus1	rs78572139	0.104295	0.13511	0.440158
genus1	rs78613526	0.0623564	0.134304	0.642438
genus1	rs12406309	-0.0469751	0.103553	0.650093
genus1	rs12986628	-0.0614758	0.102883	0.550151
genus1	rs1819812	-0.0537095	0.102282	0.599504
genus1	rs2368224	-0.106471	0.101382	0.293629
genus1	rs2846589	-0.0524773	0.103525	0.61222
genus1	rs2997412	-0.0435135	0.10305	0.672837
genus1	rs4400279	-0.0732844	0.0995222	0.46151
genus1	rs4799823	-0.0408252	0.10458	0.69626
genus1	rs55707116	-0.0181447	0.0962331	0.850446
genus1	rs58681734	-0.0738656	0.101183	0.465378
genus1	rs61791565	-0.0801703	0.0968978	0.408027
genus1	rs75140805	-0.023009	0.100808	0.819455
genus1	rs7635831	-0.0208296	0.0989607	0.833291
genus1	rs7693984	-0.0201725	0.0960127	0.833588
genus1	rs78120384	-0.05588	0.114391	0.625197
genus1	rs11597105	0.0246692	0.117451	0.833638
genus1	rs11864644	-0.0901636	0.112134	0.421355
genus1	rs12136548	-0.0366423	0.12757	0.773934
genus1	rs12989336	0.00130251	0.121668	0.991459
genus1	rs13163520	-0.0975971	0.113744	0.39087
genus1	rs2909242	-0.0312844	0.12848	0.807622
genus1	rs3124783	-0.0402338	0.126669	0.750766
genus1	rs4388134	0.0181497	0.115894	0.875556
genus1	rs62167033	-0.0500948	0.124002	0.686224
genus1	rs78399089	-0.0249509	0.129475	0.847188
genus1	rs934940	0.00501286	0.118677	0.966308
genus1	rs10036909	-0.190339	0.151829	0.209972
genus1	rs11787826	0.0141438	0.233758	0.951752
genus1	rs1990708	0.0541475	0.162087	0.738331
genus1	rs2017373	-0.0589164	0.239913	0.806012
genus1	rs7225245	-0.0589153	0.242224	0.807829
genus1	rs11054680	-0.0435882	0.112344	0.698024
genus1	rs11666533	0.00887344	0.109017	0.935128
genus1	rs149744580	-0.0569731	0.111682	0.609956
genus1	rs2834977	-0.0170917	0.110335	0.876894
genus1	rs2952020	-0.0354795	0.109665	0.746298
genus1	rs3734633	-0.048291	0.10826	0.655551
genus1	rs4869133	0.00248716	0.117827	0.983159
genus1	rs55756211	-0.021529	0.10874	0.843056
genus1	rs7199484	-0.0273312	0.110022	0.803812
genus2	rs111862613	0.0647032	0.122218	0.596523
genus2	rs117107102	0.0864169	0.126119	0.493218
genus2	rs11729256	-0.00522058	0.111465	0.962644
genus2	rs12908520	0.111979	0.112225	0.318371
genus2	rs2602429	0.0281321	0.114889	0.806562
genus2	rs4242783	0.0737726	0.12057	0.540627
genus2	rs4936098	0.0591627	0.120754	0.624173
genus2	rs61779207	0.088619	0.118596	0.454923
genus2	rs74542928	0.0602753	0.118491	0.610968
genus2	rs9349825	0.104983	0.111204	0.345141
genus2	rs941682	0.0539809	0.119131	0.650462
genus2	rs2154444	-0.235976	0.113338	0.0373366
genus2	rs34619204	-0.221245	0.123077	0.0722366
genus2	rs4364940	-0.164983	0.142175	0.245876
genus2	rs4680035	-0.0999082	0.111266	0.369226
genus2	rs58212166	-0.109774	0.126635	0.386021
genus2	rs11585893	0.245125	0.180739	0.175025
genus2	rs13207588	0.266993	0.170847	0.118109
genus2	rs1340391	0.322227	0.168389	0.0556725
genus2	rs17619981	0.187744	0.17878	0.293655
genus2	rs2023437	0.248671	0.17334	0.151404
genus2	rs66710942	0.264208	0.17201	0.124538
genus2	rs6795673	0.195137	0.174703	0.264008
genus2	rs11155559	-0.058582	0.184467	0.750808
genus2	rs12909713	0.00435503	0.182189	0.980929
genus2	rs13242616	-0.031283	0.186195	0.866574
genus2	rs199035	-0.0232383	0.186361	0.900765
genus2	rs2276875	-0.103667	0.173947	0.551195
genus2	rs2428166	-0.0846003	0.163	0.603747
genus2	rs35177866	-0.0404003	0.184161	0.826358
genus2	rs62251337	-0.0116807	0.182794	0.949049
genus2	rs72684847	-0.104991	0.173375	0.544798
genus2	rs76181748	-0.0133665	0.189187	0.943674
genus2	rs77455852	0.102532	0.134942	0.44736
genus2	rs79795328	-0.0195141	0.186534	0.916682
genus2	rs10084203	-0.170599	0.156439	0.275486
genus2	rs12034718	-0.0774276	0.145783	0.595338
genus2	rs12585793	-0.220824	0.18067	0.221611
genus2	rs2017189	-0.236559	0.147764	0.109393
genus2	rs4962426	-0.179706	0.1617	0.266416
genus2	rs56221232	-0.179533	0.162102	0.268065
genus2	rs62478070	-0.27988	0.1508	0.0634572
genus2	rs7322368	-0.152449	0.154378	0.323396
genus2	rs11228830	0.0602156	0.10971	0.583102
genus2	rs113054641	0.0721962	0.107593	0.502211
genus2	rs12304031	0.0469209	0.107103	0.661319
genus2	rs12458763	0.0509333	0.106384	0.632104
genus2	rs1862649	0.0478615	0.10724	0.655379
genus2	rs2114713	0.0429757	0.108001	0.690689
genus2	rs62130338	0.0504921	0.109195	0.643794
genus2	rs62390301	0.0797303	0.10925	0.465516
genus2	rs7083431	0.0447363	0.108016	0.678753
genus2	rs71428626	0.0538532	0.105954	0.611265
genus2	rs72814525	0.0333846	0.107194	0.755466
genus2	rs78453362	0.0856641	0.105935	0.41872
genus2	rs9657374	-0.00368594	0.107969	0.972766
genus2	rs11264403	-0.107822	0.15736	0.49322
genus2	rs115807074	-0.141499	0.15063	0.347536
genus2	rs116847295	-0.255735	0.161028	0.112256
genus2	rs12341505	-0.21659	0.159289	0.173915
genus2	rs2795528	-0.298831	0.151314	0.0482789
genus2	rs2817172	-0.138177	0.157638	0.380733
genus2	rs550843	-0.153266	0.172159	0.37333
genus2	rs1010560	0.104669	0.186342	0.574318
genus2	rs12794898	0.0908459	0.187283	0.627624
genus2	rs1519491	0.106458	0.185708	0.566471
genus2	rs1576241	0.16271	0.183776	0.375956
genus2	rs2907920	0.206493	0.163036	0.205317
genus2	rs4277593	0.0454154	0.16771	0.786547
genus2	rs56405618	0.160701	0.187642	0.391764
genus2	rs73031725	0.21813	0.166308	0.189654
genus2	rs73167075	0.137948	0.187252	0.461305
genus2	rs74101919	0.0721561	0.168787	0.669016
genus2	rs946513	0.122454	0.203782	0.547901
genus2	rs10070053	-0.0980456	0.147107	0.505097
genus2	rs12634070	-0.136424	0.142188	0.337325
genus2	rs2482516	-0.0354151	0.140384	0.800831
genus2	rs35890118	-0.113358	0.145292	0.435268
genus2	rs61823518	-0.140966	0.139053	0.310697
genus2	rs6677933	-0.0899602	0.146414	0.538936
genus2	rs72680320	0.000501899	0.139892	0.997137
genus2	rs9426473	-0.148268	0.140761	0.292189
genus2	rs10501370	-0.0256763	0.14872	0.862927
genus2	rs10798999	0.032184	0.146967	0.826659
genus2	rs10808115	0.0311187	0.146401	0.831672
genus2	rs117748144	-0.0409118	0.144071	0.776434
genus2	rs13116360	0.0631623	0.147801	0.669126
genus2	rs17074066	0.00679167	0.147092	0.963172
genus2	rs17474256	0.0446103	0.139705	0.749486
genus2	rs281379	0.0546423	0.134778	0.685165
genus2	rs28584818	-0.0568179	0.144635	0.694441
genus2	rs60254196	-0.04311	0.141347	0.76037
genus2	rs630939	-0.0309467	0.14533	0.831373
genus2	rs6550770	-0.0339036	0.154571	0.826385
genus2	rs74018587	0.0229989	0.157158	0.883651
genus2	rs78056098	-0.00663682	0.150232	0.964763
genus2	rs949971	0.00574385	0.1508	0.969617
genus2	rs10263623	-0.0701227	0.0613774	0.253253
genus2	rs10458299	-0.0494098	0.0623359	0.427989
genus2	rs11006576	-0.0599454	0.062868	0.340331
genus2	rs113893692	-0.0601658	0.063545	0.34373
genus2	rs34297067	-0.0123223	0.06434	0.84812
genus2	rs61841040	-0.0387837	0.0639749	0.54436
genus2	rs6818880	-0.0396529	0.0628897	0.528358
genus2	rs77910827	-0.0551814	0.0638188	0.387226
genus2	rs7827125	-0.0462749	0.0628891	0.461842
genus2	rs7880204	-0.0672	0.0628084	0.284655
genus2	rs9425984	-0.0410435	0.0627852	0.513297
genus2	rs12129908	0.090504	0.122443	0.459815
genus2	rs12423772	0.132156	0.126107	0.294654
genus2	rs2973294	0.0240711	0.123563	0.845543
genus2	rs34561138	0.0728093	0.121038	0.547481
genus2	rs440215	0.123276	0.124164	0.320785
genus2	rs11617697	-0.0212449	0.11254	0.850268
genus2	rs12964517	0.0445993	0.110532	0.686584
genus2	rs13082419	-0.00130843	0.109504	0.990467
genus2	rs16884680	0.00973639	0.110898	0.930039
genus2	rs35179274	0.02844	0.109899	0.795802
genus2	rs3809430	0.0285606	0.110243	0.795582
genus2	rs57199565	0.0784122	0.111553	0.482109
genus2	rs66746423	0.0566666	0.11072	0.608792
genus2	rs6704822	0.0367404	0.110127	0.738667
genus2	rs72783037	-0.00471542	0.110626	0.966001
genus2	rs73615400	0.00177875	0.111012	0.987216
genus2	rs73849225	0.0148623	0.110658	0.893159
genus2	rs78250280	0.00969779	0.110461	0.930041
genus2	rs876734	0.0344784	0.110882	0.75584
genus2	rs9316536	0.0429333	0.11113	0.69925
genus2	rs10140184	0.00369839	0.123601	0.976129
genus2	rs10917203	-0.00200027	0.124322	0.987163
genus2	rs112176119	-0.0776058	0.125639	0.53678
genus2	rs13239072	-0.0263777	0.124653	0.832412
genus2	rs17830032	-0.00234769	0.132675	0.985882
genus2	rs1999224	-0.0299929	0.123541	0.808179
genus2	rs2012708	-0.0346234	0.123131	0.778563
genus2	rs2213117	-0.0411955	0.125312	0.742349
genus2	rs75586835	-0.0669137	0.124012	0.589491
genus2	rs11126423	0.18382	0.20169	0.362085
genus2	rs11736617	0.122331	0.214559	0.568574
genus2	rs12812672	0.138003	0.216614	0.524064
genus2	rs149302	0.0898551	0.21991	0.682834
genus2	rs16840310	0.0844094	0.221328	0.702924
genus2	rs16940167	0.0753639	0.219227	0.731019
genus2	rs17156849	0.0802135	0.218171	0.713124
genus2	rs62029761	0.134359	0.220472	0.542249
genus2	rs62200412	0.0979597	0.226493	0.665374
genus2	rs72730932	0.147705	0.21571	0.493508
genus2	rs739451	0.141564	0.217151	0.514456
genus2	rs9276029	-0.0659724	0.135438	0.626184
genus2	rs9837139	0.181975	0.209848	0.385846
genus2	rs112362903	-0.146583	0.136779	0.283864
genus2	rs12049454	-0.101389	0.139345	0.466851
genus2	rs1426266	-0.136532	0.138082	0.322775
genus2	rs3842897	-0.188826	0.139631	0.176273
genus2	rs62414802	-0.137253	0.136339	0.31408
genus2	rs7119679	-0.0688456	0.141481	0.626537
genus2	rs76463770	-0.100725	0.140403	0.473126
genus2	rs8076666	-0.163284	0.137646	0.235522
genus2	rs10781340	-0.0202216	0.0959463	0.833075
genus2	rs111582866	-0.034845	0.0968219	0.718932
genus2	rs35509	-0.0550488	0.0948856	0.561807
genus2	rs4822728	-0.0666302	0.0969266	0.491812
genus2	rs76022354	0.00405526	0.103248	0.96867
genus2	rs78909003	-0.00517406	0.104529	0.960522
genus2	rs9328464	-0.0319672	0.0971085	0.742011
genus2	rs9382510	-0.0776462	0.0986213	0.431097
genus2	rs9895850	-0.0512771	0.0980704	0.601072
genus2	rs10885477	-0.0266041	0.0880098	0.762435
genus2	rs11080063	-0.0541425	0.0926088	0.558792
genus2	rs111745969	-0.119935	0.0941374	0.202647
genus2	rs113593397	-0.0855357	0.0993059	0.389053
genus2	rs116500994	-0.113721	0.0887747	0.200192
genus2	rs12701617	-0.0818717	0.0983012	0.404921
genus2	rs1867876	-0.0817141	0.0995045	0.411527
genus2	rs4146507	-0.10569	0.0950857	0.266345
genus2	rs73139538	-0.0884634	0.0964981	0.35928
genus2	rs77293403	-0.0910279	0.0972084	0.349057
genus2	rs80149660	-0.0887018	0.101984	0.384429
genus2	rs9500080	-0.0679515	0.0973942	0.485368
genus2	rs9529719	-0.0729224	0.0980766	0.457164
genus2	rs967319	-0.0779283	0.0982834	0.42784
genus2	rs10805326	0.0854236	0.149431	0.567553
genus2	rs11109097	0.0305805	0.151453	0.839983
genus2	rs118030283	0.0227688	0.150629	0.879851
genus2	rs16938435	0.011157	0.149214	0.940396
genus2	rs2098844	-0.0026066	0.139909	0.985136
genus2	rs2702387	0.109778	0.134411	0.414082
genus2	rs4327025	0.0764436	0.149132	0.608237
genus2	rs447950	-0.0175579	0.135794	0.897122
genus2	rs478972	0.0129068	0.154391	0.933376
genus2	rs6062862	0.0822166	0.142883	0.565013
genus2	rs62430350	0.0492299	0.15144	0.745122
genus2	rs68093214	0.0972797	0.138927	0.483788
genus2	rs6875660	0.0521946	0.149168	0.726411
genus2	rs893394	0.026216	0.149916	0.861181
genus2	rs9348442	0.0469592	0.153041	0.758965
genus2	rs1031599	0.103335	0.127756	0.418603
genus2	rs12566975	0.0980958	0.128717	0.445996
genus2	rs1528479	0.0874005	0.126756	0.490499
genus2	rs1997204	0.118835	0.129528	0.358908
genus2	rs2385421	0.195684	0.125706	0.119547
genus2	rs3821998	0.119461	0.131203	0.362557
genus2	rs4738679	0.103169	0.130347	0.428653
genus2	rs6112314	0.115884	0.131342	0.377611
genus2	rs615997	0.146095	0.126428	0.247864
genus2	rs62285313	0.149172	0.126389	0.237896
genus2	rs72829893	0.0572771	0.131718	0.663673
genus2	rs78068103	0.0559823	0.127601	0.660858
genus2	rs789029	0.119535	0.129465	0.355849
genus2	rs117467633	-0.103286	0.13317	0.437988
genus2	rs12127733	-0.00894487	0.122554	0.941816
genus2	rs12208226	-0.0872949	0.143951	0.544236
genus2	rs12863463	-0.0550118	0.139528	0.693382
genus2	rs17067076	-0.060712	0.14448	0.674331
genus2	rs1928659	-0.1328	0.125944	0.291683
genus2	rs1929743	-0.025018	0.126219	0.84288
genus2	rs3756315	-0.145682	0.115727	0.208088
genus2	rs6116753	-0.0731045	0.14016	0.601963
genus2	rs2861203	-0.064134	0.518769	0.90161
genus2	rs72776675	-0.177861	0.368296	0.629146
genus2	rs9932954	0.33936	0.314236	0.280164
genus2	rs10952110	-0.0263974	0.111176	0.812316
genus2	rs11263806	0.041158	0.0979685	0.674402
genus2	rs12611395	-0.040556	0.108153	0.707671
genus2	rs160061	0.00284323	0.113185	0.979959
genus2	rs28540839	-0.00410856	0.113885	0.971221
genus2	rs2880566	0.0100298	0.109602	0.927087
genus2	rs4955932	0.0200292	0.106804	0.851243
genus2	rs59805249	0.000671602	0.113903	0.995296
genus2	rs68104925	-0.0173761	0.113423	0.878243
genus2	rs7073658	-0.00552189	0.113861	0.96132
genus2	rs73044693	-0.0256001	0.11257	0.820101
genus2	rs7616165	-0.0703388	0.102842	0.494008
genus2	rs76193507	-0.0437035	0.132213	0.740981
genus2	rs7832116	0.0134798	0.109761	0.902257
genus2	rs954878	0.00488429	0.112649	0.965416
genus2	rs10417872	0.220059	0.0784984	0.00505741
genus2	rs123059	0.239539	0.0791113	0.00246281
genus2	rs12621813	0.237037	0.0774574	0.00221168
genus2	rs17168302	0.227598	0.079704	0.00429645
genus2	rs2293361	0.229412	0.0769586	0.00287333
genus2	rs4766997	0.209924	0.0792231	0.00805427
genus2	rs55910161	0.232419	0.0771014	0.0025744
genus2	rs6674304	0.213187	0.0759269	0.0049883
genus2	rs7992246	0.170234	0.0780097	0.029094
genus2	rs10202904	0.105945	0.0997579	0.288227
genus2	rs1334944	0.117265	0.0981834	0.232341
genus2	rs4802933	0.0558085	0.100519	0.578757
genus2	rs6776814	0.123018	0.0915919	0.179236
genus2	rs76029318	0.0723278	0.0993096	0.466426
genus2	rs894996	0.067339	0.09948	0.498463
genus2	rs10093869	-0.38849	0.16169	0.0162753
genus2	rs10423795	-0.302554	0.160034	0.0586832
genus2	rs28417404	-0.396416	0.156115	0.0111087
genus2	rs4793970	-0.255132	0.160825	0.112649
genus2	rs6856150	-0.340381	0.162053	0.0356908
genus2	rs74553962	-0.356801	0.165121	0.0307074
genus2	rs77779484	-0.320003	0.165232	0.0527831
genus2	rs12206468	-0.104819	0.191611	0.584351
genus2	rs12925026	1.31119e-05	0.149071	0.99993
genus2	rs1954532	-0.183964	0.15653	0.23989
genus2	rs28889936	-0.0291859	0.174963	0.867518
genus2	rs62422654	-0.0493579	0.186841	0.791649
genus2	rs72866977	-0.0941246	0.191286	0.622675
genus2	rs751183	-0.15116	0.171683	0.37861
genus2	rs8076323	-0.133998	0.184448	0.467544
genus2	rs10464997	0.0840029	0.0708283	0.235619
genus2	rs11108500	0.0749452	0.0722162	0.299368
genus2	rs111966731	0.0845476	0.0720386	0.240538
genus2	rs12002250	0.0470216	0.0682665	0.490952
genus2	rs1569853	0.0733149	0.0707669	0.3002
genus2	rs36057338	0.0620933	0.0681651	0.362334
genus2	rs3862635	0.0476586	0.0689392	0.489369
genus2	rs4428215	0.0839239	0.0714971	0.240472
genus2	rs6000536	0.0947022	0.0688546	0.169009
genus2	rs6993398	0.105335	0.0689056	0.126341
genus2	rs736744	0.0405562	0.0702232	0.56358
genus2	rs118038478	-0.0562246	0.0652818	0.389094
genus2	rs12124567	-0.0547012	0.0647971	0.398562
genus2	rs12195431	-0.0436673	0.0659306	0.507765
genus2	rs2240542	-0.024152	0.0653495	0.711693
genus2	rs2918132	-0.0599332	0.0655997	0.360916
genus2	rs430270	-0.0483396	0.0654714	0.460313
genus2	rs57404562	-0.0401534	0.0652151	0.538088
genus2	rs79263163	0.00292403	0.0659416	0.964631
genus2	rs9426434	-0.0254869	0.0660322	0.699514
genus2	rs9608249	-0.0360055	0.0649656	0.579425
genus2	rs9959718	-0.0528554	0.0653851	0.418877
genus2	rs12740451	0.221647	0.164232	0.177144
genus2	rs16910295	0.305842	0.131081	0.0196356
genus2	rs2160994	0.255797	0.162604	0.115688
genus2	rs2943022	0.18773	0.158761	0.237019
genus2	rs302266	0.260526	0.161547	0.106811
genus2	rs329182	0.213231	0.16452	0.194949
genus2	rs55858165	0.271933	0.166954	0.103358
genus2	rs57466170	0.245317	0.160171	0.125622
genus2	rs6445851	0.179662	0.155674	0.248463
genus2	rs6930661	0.205905	0.161998	0.203716
genus2	rs75326254	0.245683	0.163342	0.132555
genus2	rs78753150	0.203101	0.165888	0.220828
genus2	rs9300744	0.149869	0.134836	0.266356
genus2	rs10827477	0.312635	0.13986	0.0253944
genus2	rs113753996	0.177716	0.143615	0.215921
genus2	rs1223978	0.250962	0.138784	0.0705616
genus2	rs1492620	0.314155	0.140907	0.0257795
genus2	rs2482038	0.285601	0.139527	0.0406654
genus2	rs2791343	0.26132	0.139417	0.0608782
genus2	rs2833828	0.257495	0.138759	0.0634962
genus2	rs4955951	0.28191	0.138189	0.0413478
genus2	rs6121460	0.285844	0.13942	0.0403414
genus2	rs79968837	0.312053	0.137279	0.0230186
genus2	rs8053158	0.216091	0.138718	0.119288
genus2	rs10274562	0.0554183	0.0734457	0.45052
genus2	rs12636310	-0.0254405	0.104991	0.808538
genus2	rs12724320	0.00494386	0.106477	0.962966
genus2	rs1416041	0.00323313	0.112076	0.976986
genus2	rs2729556	0.00407518	0.105251	0.969115
genus2	rs4490371	-0.00455961	0.10629	0.965783
genus2	rs79113084	-0.0464016	0.0884768	0.599966
genus2	rs9729514	-0.0490603	0.0931307	0.59834
genus2	rs11581881	0.0199364	0.133295	0.881107
genus2	rs12189346	0.0211423	0.132842	0.873548
genus2	rs12336782	0.00336684	0.127375	0.978912
genus2	rs12485353	0.00544941	0.129471	0.966427
genus2	rs12781711	0.0864809	0.129835	0.505359
genus2	rs16918863	0.0326742	0.133781	0.807048
genus2	rs2730183	0.0473318	0.131085	0.718042
genus2	rs4385846	0.104918	0.127671	0.411202
genus2	rs75088940	0.0354825	0.132259	0.788484
genus2	rs76973485	-0.0542045	0.136127	0.69049
genus2	rs9313055	0.0501341	0.133342	0.70693
genus2	rs10495392	0.118581	0.115162	0.303156
genus2	rs10791168	0.108031	0.119154	0.364592
genus2	rs10941294	0.103635	0.120121	0.388269
genus2	rs115777838	0.0936884	0.14131	0.507331
genus2	rs12638134	0.102086	0.120562	0.397133
genus2	rs34402072	0.158641	0.111656	0.155374
genus2	rs56105232	0.130865	0.118344	0.268814
genus2	rs72809222	0.0785915	0.116604	0.500309
genus2	rs73186226	0.0617986	0.112067	0.581329
genus2	rs853612	0.0990307	0.119513	0.407319
genus2	rs995642	0.059532	0.112028	0.595139
genus2	rs10931481	0.0804978	0.15142	0.59499
genus2	rs12079579	0.0571174	0.154696	0.711961
genus2	rs12539819	-0.0132483	0.134809	0.921715
genus2	rs1391597	0.0637642	0.155305	0.681385
genus2	rs2047242	0.0270451	0.153222	0.859894
genus2	rs2166943	0.0966951	0.146226	0.508439
genus2	rs289410	0.026519	0.153876	0.86317
genus2	rs431418	-0.0330607	0.119184	0.78148
genus2	rs71386687	0.126529	0.148164	0.393115
genus2	rs73802842	0.0558026	0.157248	0.722687
genus2	rs9870933	0.0805481	0.153537	0.599851
genus2	rs10028567	0.00741301	0.13395	0.955866
genus2	rs10448310	-0.0504769	0.131301	0.700655
genus2	rs11110281	-0.0161837	0.133656	0.903624
genus2	rs11720390	-0.0600609	0.13168	0.648309
genus2	rs11764382	4.26163e-05	0.130955	0.99974
genus2	rs17708276	-0.00409271	0.130732	0.975025
genus2	rs1918540	-0.0370671	0.130502	0.776385
genus2	rs2370083	-0.0450256	0.129368	0.727808
genus2	rs57646748	-0.0370796	0.128559	0.773022
genus2	rs6806351	-0.0259645	0.131904	0.843949
genus2	rs71481756	0.0199433	0.130316	0.878368
genus2	rs7916711	-0.064033	0.137541	0.641533
genus2	rs10898797	0.0238896	0.0713283	0.737681
genus2	rs112102233	0.0196394	0.0722253	0.785685
genus2	rs1232220	0.029533	0.0718419	0.681011
genus2	rs17706273	0.0402743	0.0712938	0.572137
genus2	rs191093	-0.0217721	0.0727297	0.764668
genus2	rs4904512	0.0234833	0.071454	0.742421
genus2	rs55799124	0.00494667	0.0729384	0.945929
genus2	rs67476743	0.0676972	0.074296	0.362199
genus2	rs6920448	0.0313833	0.0716465	0.661364
genus2	rs7019909	-0.0030223	0.0724383	0.96672
genus2	rs7333521	0.0272328	0.0711771	0.702012
genus2	rs75091807	0.017212	0.0720656	0.811231
genus2	rs7561370	0.0338163	0.0724065	0.640476
genus2	rs1882878	-0.145726	0.148349	0.325944
genus2	rs2013594	-0.13273	0.148296	0.37077
genus2	rs55807413	-0.172809	0.14578	0.235857
genus2	rs62376424	-0.11835	0.148329	0.424937
genus2	rs6656807	-0.120276	0.147146	0.413705
genus2	rs742016	-0.0760618	0.1461	0.602635
genus2	rs11899949	0.111864	0.0685136	0.102528
genus2	rs12512543	0.0711447	0.0670572	0.28871
genus2	rs173120	0.0660366	0.0674179	0.327327
genus2	rs1882775	0.0412337	0.0675475	0.54157
genus2	rs2546432	0.0679409	0.0677493	0.315944
genus2	rs342302	0.0497734	0.0674487	0.460548
genus2	rs4764863	0.0876806	0.0685649	0.200968
genus2	rs4895919	0.0758164	0.0682534	0.266652
genus2	rs56349194	0.0925226	0.0675147	0.17056
genus2	rs911666	0.076839	0.0677142	0.256478
genus3	rs1107244	-0.0751886	0.156676	0.631299
genus3	rs11769002	-0.0938282	0.158824	0.554675
genus3	rs11958296	-0.0255352	0.14573	0.860905
genus3	rs12990744	-0.074385	0.158457	0.63876
genus3	rs1689282	-0.0882034	0.158155	0.577047
genus3	rs2290844	-0.1505	0.147078	0.306182
genus3	rs2450745	-0.0141081	0.144157	0.922038
genus3	rs2875322	-0.140883	0.144814	0.330626
genus3	rs34417064	-0.0263862	0.151522	0.861754
genus3	rs4810359	-0.055113	0.156079	0.724005
genus3	rs7129639	-0.0258258	0.151991	0.865075
genus3	rs8130320	-0.0945952	0.157307	0.547614
genus3	rs1901739	-0.061301	0.0698394	0.380084
genus3	rs35110698	-0.0440834	0.0689366	0.522512
genus3	rs35778461	-0.0848654	0.0704775	0.228532
genus3	rs594561	-0.047155	0.0696052	0.498112
genus3	rs602075	-0.0455202	0.0730343	0.533106
genus3	rs6742198	-0.049922	0.0707868	0.480658
genus3	rs76904847	-0.0574103	0.0695796	0.409314
genus3	rs7898615	-0.056994	0.0697838	0.414087
genus3	rs10150232	0.130127	0.140712	0.355081
genus3	rs11018566	0.129643	0.148075	0.381289
genus3	rs115414803	0.117165	0.148217	0.429237
genus3	rs1272208	0.170031	0.13056	0.192806
genus3	rs1431492	0.0779206	0.135313	0.564713
genus3	rs17734739	0.0379228	0.123468	0.758732
genus3	rs34449434	0.136369	0.140033	0.33014
genus3	rs4669806	0.117411	0.142295	0.409303
genus3	rs6494922	0.1489	0.133236	0.263752
genus3	rs6563550	0.124761	0.141829	0.379043
genus3	rs7155595	0.067209	0.131737	0.609928
genus3	rs8005030	0.139455	0.140973	0.322551
genus3	rs9347879	0.105374	0.142549	0.459776
genus3	rs12022129	0.0188312	0.101714	0.85312
genus3	rs182549	0.138216	0.115109	0.229852
genus3	rs2491158	0.00632997	0.100947	0.950001
genus3	rs2686790	0.0176293	0.101143	0.86163
genus3	rs4957061	0.0225144	0.101351	0.824202
genus3	rs540489	0.0328645	0.100952	0.744768
genus3	rs55888705	-0.00797089	0.101045	0.937124
genus3	rs5746486	0.0237527	0.101347	0.814697
genus3	rs62181700	0.0105835	0.101499	0.916953
genus3	rs7322849	-0.0103382	0.102854	0.919937
genus3	rs75344046	-0.0427496	0.10953	0.696314
genus3	rs857444	0.0418741	0.101532	0.680029
genus3	rs11069458	0.0387643	0.115372	0.736875
genus3	rs1241171	0.0306442	0.11478	0.789482
genus3	rs1571225	0.0490699	0.116934	0.67475
genus3	rs1969927	0.0483954	0.11543	0.675025
genus3	rs2728491	0.0476165	0.115513	0.680179
genus3	rs3827020	0.043077	0.116766	0.71219
genus3	rs4798126	0.0702076	0.116306	0.54608
genus3	rs542415	0.0395015	0.116594	0.734763
genus3	rs60178956	0.0945386	0.115283	0.412183
genus3	rs6793291	0.0393127	0.114893	0.732225
genus3	rs72676854	0.116513	0.115645	0.31369
genus3	rs7802841	0.077409	0.116931	0.507968
genus3	rs9899990	0.0688795	0.116053	0.552833
genus3	rs10090365	0.01894	0.0930433	0.838696
genus3	rs10809135	-0.00967346	0.0928054	0.916984
genus3	rs36155147	0.0368275	0.0949127	0.698005
genus3	rs4294381	0.0348747	0.0928198	0.707122
genus3	rs4678258	0.0185924	0.0930669	0.841657
genus3	rs6489992	0.0238351	0.0927372	0.797165
genus3	rs6494306	0.087216	0.0939882	0.353436
genus3	rs7400877	0.0286421	0.0923017	0.756326
genus3	rs9973954	0.0403646	0.0932086	0.664973
genus3	rs11532348	0.00361066	0.0968099	0.970249
genus3	rs12684609	0.0627134	0.0919478	0.495204
genus3	rs12996055	-0.00272826	0.0964885	0.977442
genus3	rs143662916	-0.0103398	0.0954146	0.913704
genus3	rs189356	0.0174389	0.0992551	0.860531
genus3	rs213863	0.0054453	0.0991945	0.956222
genus3	rs305411	0.0214229	0.0993877	0.82934
genus3	rs3828477	0.0756681	0.0927974	0.414837
genus3	rs72821405	-0.0217343	0.0923098	0.813859
genus3	rs74919520	0.0478352	0.0939308	0.61057
genus3	rs10810043	0.0233125	0.156163	0.88133
genus3	rs11077359	-0.00814773	0.156043	0.958358
genus3	rs11080344	0.0448764	0.157292	0.775409
genus3	rs13247359	-0.0119248	0.157013	0.939461
genus3	rs13394391	-0.0401238	0.157143	0.798466
genus3	rs178271	0.0303627	0.152625	0.842312
genus3	rs4575475	0.0908071	0.157498	0.564235
genus3	rs7521171	0.0181537	0.158764	0.908965
genus3	rs8100692	-0.0270361	0.159899	0.865732
genus3	rs11150408	-0.155732	0.193988	0.422097
genus3	rs12537781	-0.12279	0.190978	0.520256
genus3	rs13279148	-0.0474617	0.149616	0.751073
genus3	rs1899291	-0.130389	0.193818	0.501112
genus3	rs3005511	-0.179885	0.190449	0.344898
genus3	rs345219	-0.100846	0.186185	0.588064
genus3	rs3752849	-0.146144	0.207454	0.481144
genus3	rs4793307	-0.195201	0.187435	0.297674
genus3	rs62503162	-0.191892	0.18141	0.290154
genus3	rs73729431	-0.227772	0.15526	0.142365
genus3	rs1434153	0.0357461	0.126013	0.776664
genus3	rs16936671	0.072306	0.118986	0.543398
genus3	rs17804233	0.0471	0.125073	0.706484
genus3	rs2901723	0.0397443	0.125345	0.751184
genus3	rs340991	0.0754574	0.117194	0.519662
genus3	rs3804326	0.0321629	0.125129	0.79715
genus3	rs45480394	0.0310727	0.125685	0.804734
genus3	rs4697572	0.011527	0.122818	0.925225
genus3	rs58236560	0.0100465	0.124144	0.935501
genus3	rs61806970	-0.0123111	0.117137	0.916297
genus3	rs622418	0.03527	0.125881	0.779336
genus3	rs6474512	-0.0217499	0.108506	0.84113
genus3	rs710230	0.015853	0.125484	0.899467
genus3	rs7221249	0.0537585	0.127377	0.672995
genus3	rs9590927	0.0946218	0.105406	0.369352
genus3	rs112767262	-0.0552494	0.131109	0.673463
genus3	rs113127095	-0.0210092	0.130884	0.872473
genus3	rs113513883	0.011352	0.131152	0.931024
genus3	rs1154904	0.0526028	0.131331	0.688761
genus3	rs118526	-0.0822462	0.129469	0.52526
genus3	rs2798105	-0.0263658	0.130955	0.840437
genus3	rs4731451	-0.0334547	0.130094	0.797056
genus3	rs57024273	-0.0146098	0.129523	0.910192
genus3	rs592299	-0.0283335	0.130609	0.82826
genus3	rs73208162	0.015249	0.127054	0.904468
genus3	rs112617308	-0.0157812	0.0725473	0.827796
genus3	rs12151423	0.000128839	0.0727328	0.998587
genus3	rs13139592	0.00142579	0.0725396	0.984318
genus3	rs1384962	0.0537729	0.0736538	0.465344
genus3	rs2913110	-0.0109299	0.0726474	0.880409
genus3	rs4862235	-0.0029122	0.0729714	0.968166
genus3	rs62348779	0.0201418	0.0732069	0.783213
genus3	rs6591893	-0.0191969	0.072842	0.792133
genus3	rs720439	0.00415894	0.0723373	0.954152
genus3	rs73199919	0.0344977	0.0728138	0.635657
genus3	rs1020520	0.051392	0.13143	0.695781
genus3	rs10444197	0.0779237	0.132663	0.556949
genus3	rs11052069	0.0411342	0.132474	0.756175
genus3	rs11720857	0.0361579	0.132629	0.785141
genus3	rs12906958	-0.0253852	0.132738	0.848336
genus3	rs17159861	0.0941888	0.135501	0.486984
genus3	rs2644213	0.0628305	0.132949	0.636505
genus3	rs4076415	0.0683927	0.132962	0.606989
genus3	rs62024432	0.0315535	0.132074	0.811177
genus3	rs6762473	0.0482191	0.132958	0.716856
genus3	rs76898927	0.0271536	0.134538	0.84005
genus3	rs79895140	0.0101034	0.131028	0.938537
genus3	rs9648214	0.020463	0.132292	0.877074
genus3	rs182318	-0.0382746	0.174547	0.826433
genus3	rs2200429	-0.0659099	0.178819	0.712437
genus3	rs265534	-0.0316722	0.180912	0.861025
genus3	rs4583233	-0.102228	0.183844	0.578171
genus3	rs56080211	-0.00922784	0.187635	0.960776
genus3	rs6923695	-0.16413	0.178122	0.356818
genus3	rs10131724	0.0777731	0.0906604	0.390975
genus3	rs10923018	0.0746115	0.0851353	0.38082
genus3	rs11637981	0.0900979	0.0874471	0.302863
genus3	rs13025464	0.108341	0.0852002	0.203512
genus3	rs139749	0.0925951	0.0878929	0.292112
genus3	rs16891896	0.125047	0.0844886	0.138862
genus3	rs17519472	0.0762714	0.0858661	0.374401
genus3	rs209813	0.0828441	0.0868801	0.340314
genus3	rs2116427	0.130445	0.0777536	0.0934122
genus3	rs2229917	0.0814837	0.0857746	0.342125
genus3	rs2418654	0.0606816	0.0799761	0.448004
genus3	rs2817174	0.0727765	0.0845841	0.389566
genus3	rs57340348	0.108319	0.0859405	0.207525
genus3	rs606117	0.109251	0.0851639	0.199553
genus3	rs6676699	0.0670579	0.0842444	0.426036
genus3	rs7000472	0.0761579	0.0858545	0.375048
genus3	rs72836424	0.12086	0.0838293	0.149375
genus3	rs73139629	0.0948715	0.0869992	0.275499
genus3	rs10927394	-0.155746	0.114619	0.174205
genus3	rs114946999	-0.131096	0.113357	0.247479
genus3	rs11776390	-0.116861	0.110914	0.292058
genus3	rs1271565	-0.0809239	0.112386	0.471491
genus3	rs12753492	-0.120068	0.11106	0.279646
genus3	rs2835874	-0.144054	0.110251	0.191345
genus3	rs6910935	-0.107657	0.114669	0.347808
genus3	rs75499067	-0.212808	0.13342	0.110707
genus3	rs79656633	-0.0596869	0.120178	0.619434
genus3	rs9536330	-0.0944001	0.112037	0.399462
genus3	rs114873521	0.0421147	0.171363	0.805865
genus3	rs11811696	0.0603594	0.169661	0.722017
genus3	rs12030302	0.0623902	0.173132	0.718577
genus3	rs34066017	-0.0528995	0.168312	0.753298
genus3	rs806808	0.00645324	0.171008	0.969898
genus3	rs12513188	-0.0560866	0.0942165	0.551646
genus3	rs17586763	-0.14359	0.0858165	0.0942836
genus3	rs1926302	-0.0639675	0.0946365	0.499086
genus3	rs34187114	-0.0521438	0.0929639	0.574863
genus3	rs35228298	-0.0380604	0.0911749	0.676354
genus3	rs4541991	-0.0327897	0.0926619	0.723441
genus3	rs607782	-0.0325661	0.0918245	0.722847
genus3	rs62113381	-0.044951	0.0929448	0.628648
genus3	rs73011279	-0.0183094	0.0859114	0.831234
genus3	rs75764681	-0.0529314	0.0992017	0.593637
genus3	rs8113760	-0.0447513	0.0930741	0.630649
genus3	rs10048062	-0.118387	0.0715608	0.0980547
genus3	rs12452946	-0.113847	0.0728686	0.118204
genus3	rs1484873	-0.141065	0.076424	0.0649184
genus3	rs17167098	-0.0868449	0.0688373	0.207094
genus3	rs2154047	-0.158686	0.068317	0.0201906
genus3	rs36081916	-0.086428	0.0678229	0.20255
genus3	rs3791893	-0.106633	0.0714658	0.135677
genus3	rs609430	-0.114923	0.0730416	0.115627
genus3	rs672217	-0.134235	0.0731894	0.0666426
genus3	rs10044993	-0.0987729	0.127651	0.439064
genus3	rs13128780	-0.216603	0.115697	0.0611864
genus3	rs13249325	-0.0541217	0.121884	0.657011
genus3	rs17092615	-0.0492402	0.122302	0.687235
genus3	rs72759041	-0.0719575	0.130708	0.581961
genus3	rs11128180	0.0715046	0.126188	0.57095
genus3	rs12072562	0.0664074	0.125445	0.596547
genus3	rs12673420	0.0838115	0.126283	0.506894
genus3	rs12747809	0.0679167	0.126449	0.591194
genus3	rs12894272	0.118546	0.126245	0.347723
genus3	rs233486	0.0731101	0.126317	0.562735
genus3	rs2444793	0.0750236	0.125768	0.550827
genus3	rs2726805	0.0152381	0.125993	0.903735
genus3	rs2882478	0.0887974	0.126742	0.483544
genus3	rs35182105	0.142968	0.125061	0.252961
genus3	rs6656451	0.115636	0.126046	0.358928
genus3	rs7629954	0.0664067	0.124242	0.592999
genus3	rs10414815	-0.249336	0.130088	0.0552792
genus3	rs11192447	-0.231053	0.132547	0.081304
genus3	rs12346653	-0.236724	0.1322	0.0733505
genus3	rs17730011	-0.239492	0.133195	0.0721678
genus3	rs2833528	-0.190949	0.132376	0.149168
genus3	rs336138	-0.23706	0.131332	0.0710683
genus3	rs4576377	-0.154012	0.132617	0.24551
genus3	rs72894957	-0.244046	0.135887	0.0725036
genus3	rs74315802	-0.188571	0.135713	0.164685
genus3	rs9981767	-0.274781	0.133048	0.0388973
genus3	rs1035588	0.000927386	0.0661571	0.988816
genus3	rs17148768	0.00396084	0.0661626	0.952263
genus3	rs2759329	-0.046401	0.0663338	0.484235
genus3	rs35225860	-0.0320198	0.0652208	0.623466
genus3	rs61090148	-0.0189746	0.0661233	0.774145
genus3	rs62112538	-0.0189948	0.0675199	0.778464
genus3	rs72691585	-0.0801933	0.071937	0.264948
genus3	rs7540303	-0.00709153	0.0661511	0.914629
genus3	rs8066522	-0.0269723	0.065913	0.682385
genus3	rs9460691	-0.013733	0.0655664	0.834096
genus3	rs11627628	-0.047554	0.11732	0.685231
genus3	rs11990279	-0.0672493	0.11559	0.560706
genus3	rs12649930	-0.0219937	0.109955	0.841461
genus3	rs133832	-0.0190578	0.108099	0.860059
genus3	rs16866406	-0.0466169	0.116362	0.6887
genus3	rs16934185	-0.040915	0.11687	0.72627
genus3	rs234108	-0.111331	0.104797	0.288077
genus3	rs36095275	-0.0801041	0.116095	0.490203
genus3	rs4506202	-0.110924	0.103479	0.283746
genus3	rs61883564	-0.108409	0.104302	0.298629
genus3	rs75453768	-0.0488145	0.116816	0.676038
genus3	rs761240	-0.0510496	0.117712	0.66452
genus3	rs9393920	-0.0377537	0.114557	0.74173
genus3	rs10842464	-0.0167503	0.121076	0.889968
genus3	rs140997932	-0.046102	0.111558	0.67942
genus3	rs145020347	-0.0335318	0.120508	0.780817
genus3	rs17109926	0.0520768	0.108411	0.630968
genus3	rs17785622	0.0315482	0.119515	0.791804
genus3	rs2081023	-0.00384046	0.123745	0.975241
genus3	rs3008582	-0.00130466	0.123305	0.991558
genus3	rs3801748	0.0163793	0.119597	0.891067
genus3	rs4756632	-0.00634286	0.124761	0.959453
genus3	rs4767113	-0.0475734	0.114218	0.677033
genus3	rs7240324	-0.0542321	0.113069	0.631485
genus3	rs9602779	0.000984748	0.124335	0.993681
genus3	rs9900242	0.037929	0.113013	0.73716
genus3	rs10899911	-0.0112739	0.0901631	0.900493
genus3	rs11715853	-0.0207515	0.0901411	0.817927
genus3	rs2090816	-0.051991	0.0905214	0.565731
genus3	rs35055552	-0.0354466	0.092592	0.701849
genus3	rs55877868	-0.0676561	0.0903699	0.454063
genus3	rs62273907	-0.0199053	0.0985281	0.839896
genus3	rs6809952	-0.0188443	0.0901032	0.834338
genus3	rs6828768	-0.0055613	0.0904431	0.950969
genus3	rs7303158	-0.0315139	0.0912319	0.729774
genus3	rs7311004	-0.0314164	0.0909057	0.729649
genus3	rs7572229	-0.061152	0.0906921	0.500132
genus3	rs78383039	-0.0671664	0.0899039	0.455009
genus3	rs8039785	-0.0666464	0.0902976	0.460469
genus3	rs823424	-0.0202862	0.0903041	0.822257
genus3	rs12618201	0.134952	0.140143	0.335569
genus3	rs1264476	0.0666662	0.138904	0.631266
genus3	rs56069061	0.092692	0.137543	0.500368
genus3	rs56157888	0.0536778	0.146549	0.714157
genus3	rs74540770	0.123467	0.140871	0.380781
genus3	rs75882962	0.0504731	0.14042	0.719264
genus3	rs7982713	0.125592	0.140594	0.371701
genus3	rs111509883	-0.112784	0.0871967	0.195857
genus3	rs11685699	-0.121085	0.0837741	0.148351
genus3	rs117271932	-0.141297	0.0859435	0.100163
genus3	rs12648235	-0.0958971	0.083005	0.247961
genus3	rs1304512	-0.118723	0.0831002	0.153099
genus3	rs2104588	-0.115832	0.0818811	0.157175
genus3	rs2495052	-0.113919	0.0825287	0.167478
genus3	rs2683313	-0.099166	0.0830938	0.232704
genus3	rs4968431	-0.109482	0.082651	0.185292
genus3	rs7237249	-0.114174	0.0828815	0.168341
genus3	rs72815774	-0.066446	0.0841247	0.429615
genus3	rs746764	-0.143587	0.0837361	0.086389
genus3	rs7976209	-0.146215	0.0827807	0.0773466
genus3	rs9428102	-0.104469	0.0828886	0.20754
genus3	rs9613013	-0.0950337	0.0825708	0.249759
genus3	rs12501673	-0.0461752	0.0625532	0.460408
genus3	rs17032291	0.00023415	0.0630307	0.997036
genus3	rs17582787	0.00755961	0.0633617	0.905031
genus3	rs2074881	-0.0189996	0.062212	0.760061
genus3	rs2900503	-0.0179626	0.0639404	0.778766
genus3	rs2998141	-0.0165293	0.0632383	0.793799
genus3	rs4270579	-0.0154277	0.0629257	0.806322
genus3	rs4717843	-0.0586308	0.0634258	0.355278
genus3	rs7712231	-0.0267319	0.0627083	0.669897
genus3	rs80309088	-0.0236236	0.063103	0.708132
genus3	rs9887954	-0.0262383	0.0630746	0.677419
genus3	rs6082461	-0.0915684	0.192313	0.633973
genus3	rs7137760	-0.0531797	0.200616	0.790947
genus3	rs74303178	-0.147628	0.182032	0.417367
genus3	rs78191726	-0.0034031	0.190924	0.985779
genus3	rs918449	-0.0277607	0.197576	0.88826
genus3	rs9522712	0.0737612	0.182082	0.685406
genus3	rs9809789	-0.112523	0.193163	0.560212
genus3	rs10916131	-0.073027	0.109754	0.505815
genus3	rs10927423	-0.0701177	0.111061	0.527814
genus3	rs10964441	0.0134001	0.109797	0.902865
genus3	rs113147300	-0.0889818	0.104381	0.393954
genus3	rs11607472	-0.0602886	0.110684	0.585966
genus3	rs116974815	-0.0775089	0.11799	0.511238
genus3	rs11750293	-0.0587914	0.112581	0.601522
genus3	rs12463378	-0.0292313	0.108057	0.786762
genus3	rs15256	-0.0536319	0.111943	0.631867
genus3	rs55793120	0.0200359	0.0937885	0.830837
genus3	rs57079348	-0.0505399	0.110982	0.64883
genus3	rs6542556	-0.0376047	0.110623	0.733906
genus3	rs6793778	-0.060352	0.111729	0.589084
genus3	rs7120052	-0.0365565	0.110321	0.740369
genus3	rs7155595	-0.0887275	0.104586	0.396232
genus3	rs7249614	-0.0489659	0.111912	0.66172
genus3	rs76847269	-0.0531444	0.112383	0.636293
genus3	rs77564310	-0.0754521	0.110545	0.494892
genus3	rs882348	-0.0682219	0.110892	0.538414
genus3	rs10904297	0.155833	0.262715	0.553072
genus3	rs10967781	-0.00916522	0.242049	0.969795
genus3	rs12434631	0.103085	0.270539	0.703176
genus3	rs1475330	0.128195	0.265411	0.629092
genus3	rs35866622	0.281992	0.216219	0.192168
genus3	rs4073731	0.0157553	0.25838	0.951378
genus3	rs77034621	-0.0176363	0.214931	0.934603
genus3	rs113379006	0.0287414	0.0860082	0.738251
genus3	rs13417181	0.0693418	0.0912481	0.447299
genus3	rs2016057	0.0801383	0.0861953	0.352511
genus3	rs2187447	0.0198947	0.0801795	0.804036
genus3	rs2371572	0.00985349	0.0768841	0.898022
genus3	rs41816	0.0951363	0.0780256	0.222732
genus3	rs4600608	0.044173	0.0888681	0.619145
genus3	rs553697	0.0779677	0.0862553	0.366039
genus3	rs56203279	0.0673852	0.0890921	0.449437
genus3	rs10409783	0.0337614	0.12477	0.786707
genus3	rs12440440	0.0252315	0.124793	0.839771
genus3	rs16894137	0.018222	0.123982	0.883153
genus3	rs35156985	-0.00936768	0.118537	0.937011
genus3	rs4492265	0.0129146	0.123892	0.916978
genus3	rs8901	0.018213	0.124741	0.883916
genus3	rs10065321	-0.122654	0.139137	0.37803
genus3	rs10497836	-0.0997505	0.139647	0.475039
genus3	rs1667315	-0.14698	0.131441	0.263474
genus3	rs2114677	-0.0994208	0.146303	0.496788
genus3	rs2171249	-0.117796	0.141463	0.405015
genus3	rs3761728	-0.0271093	0.13143	0.836585
genus3	rs4347804	-0.0786082	0.141331	0.578075
genus3	rs6555306	-0.0555462	0.132489	0.675033
genus3	rs75158211	-0.0973231	0.141535	0.49169
genus3	rs76528319	-0.185778	0.141513	0.189253
genus3	rs1145877	-0.17481	0.114709	0.127522
genus3	rs11591622	-0.115966	0.114715	0.31206
genus3	rs13173038	-0.0921362	0.11667	0.429693
genus3	rs143438747	-0.14927	0.120052	0.213729
genus3	rs2050185	-0.14188	0.115506	0.219321
genus3	rs2321387	-0.0939758	0.116036	0.418007
genus3	rs2613606	-0.121408	0.115366	0.29263
genus3	rs607327	-0.115972	0.11556	0.315586
genus3	rs62501473	-0.112487	0.116499	0.33426
genus3	rs7499539	-0.127595	0.115284	0.268386
genus3	rs7638039	-0.15001	0.115518	0.194084
genus3	rs9350083	-0.151304	0.11568	0.190887
genus3	rs1883097	-0.0019972	0.147962	0.98923
genus3	rs2569953	-0.013496	0.143761	0.925206
genus3	rs2872237	-0.140402	0.144409	0.330923
genus3	rs58405430	-0.0076799	0.138054	0.955637
genus3	rs7184125	0.0268478	0.145271	0.853377
order	rs2889192	0.226777	0.14666	0.122038
order	rs34583783	0.229325	0.145183	0.114208
order	rs35011108	0.0942473	0.223967	0.673894
order	rs4073240	0.102169	0.151198	0.499212
order	rs10233278	-0.0252868	0.0717165	0.724393
order	rs10410917	-0.0344552	0.07146	0.629692
order	rs11034576	-0.0586946	0.0737492	0.426109
order	rs11207728	-0.0125458	0.0710652	0.859871
order	rs11844714	-0.0146176	0.071763	0.838594
order	rs1287018	-0.00915961	0.0712637	0.897729
order	rs4617108	0.0371544	0.0740038	0.615625
order	rs74420793	-0.0134123	0.0705997	0.849327
order	rs11146701	-0.13662	0.15066	0.36451
order	rs17343978	-0.0638865	0.136686	0.640216
order	rs2032750	-0.102034	0.153864	0.507237
order	rs4146051	-0.144986	0.156155	0.353162
order	rs4916508	-0.095783	0.151125	0.526211
order	rs55773148	-0.125939	0.156555	0.421143
order	rs62531359	-0.109835	0.154783	0.477947
order	rs62575403	-0.126935	0.156812	0.418244
order	rs72706335	-0.15808	0.159534	0.32174
order	rs73975615	-0.0567161	0.126966	0.655089
order	rs7631304	-0.145378	0.151837	0.338335
order	rs79585701	-0.180715	0.137186	0.18774
order	rs929878	-0.149904	0.150424	0.318986
order	rs10831953	-0.124604	0.111453	0.26357
order	rs12446429	-0.147386	0.114261	0.197085
order	rs13020688	-0.115527	0.112065	0.302592
order	rs182549	-0.0758679	0.129945	0.559324
order	rs4957061	-0.158343	0.112535	0.159412
order	rs540489	-0.142697	0.111603	0.201032
order	rs55888705	-0.191773	0.111336	0.0849853
order	rs6899771	-0.184163	0.112285	0.100975
order	rs7174549	-0.146125	0.112625	0.194477
order	rs7322849	-0.202598	0.113707	0.0747883
order	rs857444	-0.134239	0.112045	0.230888
order	rs1511453	0.104658	0.138581	0.450122
order	rs1928341	0.0751312	0.140403	0.592573
order	rs2321387	0.152998	0.140545	0.276329
order	rs2613606	0.117237	0.140241	0.403174
order	rs4033856	0.086502	0.139614	0.535535
order	rs6087811	0.0702624	0.144052	0.625723
order	rs62191117	0.0467061	0.14184	0.741939
order	rs62395635	0.0964482	0.141178	0.494501
order	rs75242906	0.0174829	0.146026	0.904701
order	rs7638039	0.0800933	0.140503	0.568645
order	rs10774377	0.0220205	0.121922	0.856673
order	rs112334273	0.00766506	0.123097	0.950349
order	rs13105690	-0.0165894	0.121143	0.891077
order	rs13179700	0.0558144	0.121321	0.645477
order	rs1842454	4.48405e-05	0.120353	0.999703
order	rs2273429	-0.0273209	0.120656	0.820863
order	rs290772	0.0439647	0.119734	0.71348
order	rs6442336	0.0263826	0.12116	0.827624
order	rs6814436	0.011194	0.121879	0.926821
order	rs6815608	0.015184	0.127518	0.905217
order	rs72738886	0.00885828	0.120941	0.941611
order	rs72915163	-0.0415166	0.121141	0.731813
order	rs992074	-0.0526532	0.128008	0.680833
order	rs11250875	-0.101432	0.128378	0.42947
order	rs11656361	-0.0775875	0.130664	0.552651
order	rs12974142	-0.134068	0.126617	0.28967
order	rs13307134	-0.154847	0.126902	0.222387
order	rs1397793	-0.133795	0.127465	0.293874
order	rs1816223	-0.106755	0.127782	0.403467
order	rs240104	-0.0982019	0.129313	0.447607
order	rs2442778	-0.11484	0.128785	0.372543
order	rs3025411	-0.112976	0.12991	0.384492
order	rs34739816	-0.104575	0.127427	0.411837
order	rs67561917	-0.126535	0.129576	0.328801
order	rs719099	-0.155752	0.127703	0.222601
order	rs8010111	-0.085966	0.12996	0.508305
order	rs11599763	-0.0197623	0.149049	0.894518
order	rs17791387	-0.0250808	0.146141	0.863736
order	rs186073	-0.028501	0.14903	0.848335
order	rs2838334	-0.0847365	0.141788	0.550089
order	rs3935584	0.0231134	0.14118	0.869955
order	rs4506934	-0.123993	0.144124	0.389612
order	rs6058181	0.00309091	0.148349	0.983377
order	rs62020470	-0.0880777	0.139016	0.526355
order	rs72647048	-0.0155613	0.146587	0.915458
order	rs9928243	0.0157419	0.141785	0.911596
order	rs11026530	-0.0469823	0.184483	0.798978
order	rs2374342	-0.102165	0.190344	0.591446
order	rs35673018	-0.00644749	0.165172	0.968862
order	rs504442	-0.026831	0.167658	0.872854
order	rs62210023	-0.182793	0.168418	0.277764
order	rs78143293	-0.17443	0.167211	0.296867
order	rs79757635	-0.11458	0.18516	0.536039
order	rs1074800	-0.249005	0.134016	0.0631643
order	rs10781552	-0.166972	0.134272	0.21367
order	rs17530232	-0.225198	0.133427	0.09145
order	rs1884466	-0.21839	0.133725	0.102441
order	rs2300774	-0.235926	0.134892	0.08029
order	rs290833	-0.195277	0.134233	0.145736
order	rs35161940	-0.241723	0.134287	0.0718526
order	rs4078432	-0.210515	0.133415	0.114589
order	rs56970041	-0.216274	0.131329	0.0995969
order	rs62504403	-0.240531	0.135344	0.0755374
order	rs7234058	-0.177256	0.135528	0.19091
order	rs7826267	-0.190077	0.132437	0.151224
order	rs8003149	-0.197618	0.134523	0.141824
order	rs11150282	-0.0861867	0.0931029	0.354595
order	rs113884518	-0.0258677	0.0968452	0.78939
order	rs28678345	-0.0660247	0.0934583	0.479901
order	rs367480	-0.0592032	0.0930695	0.524699
order	rs4129395	-0.036927	0.100346	0.712874
order	rs789069	-0.0239454	0.0977134	0.806412
order	rs79790072	-0.022353	0.0981835	0.819907
order	rs8028558	-0.00893684	0.0953579	0.925332
order	rs9864379	0.0554632	0.096596	0.565849
order	rs11110282	-0.110839	0.130301	0.394973
order	rs11627423	-0.120156	0.130715	0.357982
order	rs11730038	-0.126345	0.13147	0.336544
order	rs12797734	-0.111463	0.13114	0.395352
order	rs1595463	-0.151221	0.122883	0.218471
order	rs2370083	-0.130844	0.127193	0.303618
order	rs2952251	-0.0959266	0.129575	0.459106
order	rs34989881	-0.0904676	0.128261	0.480601
order	rs35344081	-0.141009	0.129591	0.276548
order	rs4028634	-0.0252724	0.114814	0.82578
order	rs57872228	-0.0909132	0.127329	0.475226
order	rs74663707	-0.0795632	0.125186	0.525063
order	rs77558518	-0.121035	0.133557	0.364806
order	rs78938557	-0.130566	0.126201	0.300862
order	rs9581006	-0.176627	0.133839	0.186937
order	rs10202904	0.064082	0.0772278	0.406664
order	rs10424197	0.0632395	0.0750107	0.399187
order	rs4257531	0.0510311	0.0753575	0.498287
order	rs6508769	0.055384	0.0761203	0.466868
order	rs6776814	0.0790827	0.0725944	0.275987
order	rs73068003	0.0533347	0.0747714	0.475658
order	rs73457410	0.0453274	0.0758137	0.549921
order	rs75208022	0.0796454	0.0787708	0.311967
order	rs894996	0.0402288	0.0763292	0.598163
order	rs11779863	0.0942814	0.127289	0.458881
order	rs12566890	0.106956	0.133339	0.422473
order	rs13100746	0.0993605	0.130852	0.447651
order	rs17235252	0.12216	0.136337	0.370242
order	rs3932485	0.13794	0.131467	0.294068
order	rs515984	0.12331	0.131982	0.350154
order	rs638542	0.115675	0.133243	0.385311
order	rs74603314	0.0452406	0.125128	0.717685
order	rs7706512	0.12888	0.133426	0.334081
order	rs7801843	0.165781	0.122833	0.17713
order	rs7853673	0.208514	0.101216	0.039391
order	rs949341	0.104427	0.130744	0.424454
order	rs11251024	-0.0402875	0.0968482	0.67742
order	rs11606187	-0.0463682	0.098261	0.637006
order	rs13385922	-0.0300593	0.0961127	0.75447
order	rs166849	-0.0148658	0.0929031	0.87287
order	rs2172426	-0.0462381	0.0972918	0.634608
order	rs267959	-0.0538842	0.0948907	0.570133
order	rs4383094	-0.0381621	0.098012	0.697009
order	rs60775321	-0.0284543	0.0957387	0.766307
order	rs72671304	-0.0661639	0.0912913	0.468602
order	rs7911787	0.0213053	0.0707435	0.76329
order	rs8126061	-0.0771813	0.0904497	0.39349
order	rs9542068	-0.0413027	0.0969769	0.670179
order	rs10965428	-0.00703453	0.0839949	0.933256
order	rs111582866	-4.00946e-05	0.0844541	0.999621
order	rs12050685	-0.00430398	0.0844289	0.959343
order	rs16970009	-0.0422541	0.079637	0.595707
order	rs4822728	-0.0210657	0.0823504	0.798101
order	rs6972479	0.0212498	0.0802274	0.79111
order	rs72756943	-0.0139607	0.0841904	0.868296
order	rs73139353	0.0120415	0.0910705	0.894809
order	rs76022354	0.0292168	0.084436	0.729325
order	rs78909003	0.0230789	0.0866186	0.789898
order	rs9382510	-0.0265114	0.0821475	0.746901
order	rs9895850	-0.00970745	0.085026	0.909103
order	rs9938097	-0.00962894	0.0847838	0.909578
order	rs1035406	0.0353891	0.0826263	0.668431
order	rs11591293	0.0431818	0.0824636	0.600524
order	rs11630875	0.0639421	0.0818224	0.434524
order	rs13336560	0.0262947	0.0821824	0.749002
order	rs1549633	0.0549865	0.0818891	0.501918
order	rs3730086	0.0555765	0.0822948	0.499463
order	rs3754624	0.0339087	0.0824898	0.681024
order	rs4278423	0.041613	0.0810619	0.607708
order	rs55876211	0.0208627	0.0827741	0.801007
order	rs61933850	0.0929224	0.0868636	0.284732
order	rs7001029	0.0623604	0.0822971	0.448602
order	rs76784716	0.0546811	0.0837916	0.514024
order	rs77304857	0.0428504	0.083086	0.606039
order	rs9813022	0.0288504	0.0832334	0.728877
order	rs1135612	0.218728	0.14562	0.133085
order	rs13086907	0.181842	0.142926	0.203274
order	rs1643968	0.228258	0.148103	0.123265
order	rs1649999	0.198988	0.143992	0.166991
order	rs2834062	0.163778	0.132965	0.218046
order	rs4463806	0.159302	0.132573	0.229513
order	rs4722181	0.291037	0.134224	0.0301363
order	rs60274479	0.235596	0.14672	0.108328
order	rs61249479	0.241626	0.147231	0.100769
order	rs71405394	0.193683	0.147687	0.18971
order	rs73232831	0.239237	0.147308	0.104363
order	rs9423647	0.261784	0.137458	0.0568499
order	rs111862613	0.0644973	0.122178	0.597572
order	rs117107102	0.08629	0.126186	0.494081
order	rs11729256	-0.00533957	0.111471	0.961795
order	rs12908520	0.111937	0.11226	0.318703
order	rs2602429	0.0278694	0.114936	0.808411
order	rs4242783	0.0736896	0.120659	0.54138
order	rs4936098	0.058989	0.120772	0.625244
order	rs61779207	0.088352	0.118598	0.456289
order	rs74542928	0.0601176	0.118487	0.611889
order	rs9349825	0.104868	0.111226	0.345763
order	rs941682	0.0538283	0.119131	0.651385
order	rs1002941	0.0785306	0.08688	0.36605
order	rs11770843	0.0631356	0.088385	0.475026
order	rs17114848	0.0784022	0.0868581	0.366713
order	rs2031282	0.0631387	0.0870968	0.468498
order	rs2825714	0.0155194	0.0884023	0.860644
order	rs62570196	0.0726165	0.0863932	0.400608
order	rs72640280	0.0170264	0.0882663	0.847038
order	rs77599476	0.0643143	0.0889324	0.469568
phylum	rs11766971	-0.02498	0.141676	0.860044
phylum	rs12528285	-0.112082	0.140765	0.425895
phylum	rs13192624	-0.119573	0.132645	0.367346
phylum	rs1397793	-0.0784444	0.148435	0.59717
phylum	rs4429415	0.0110615	0.132955	0.933695
phylum	rs55888705	-0.108934	0.140692	0.438768
phylum	rs6496870	-0.0557749	0.149258	0.708641
phylum	rs6743026	-0.0536213	0.14846	0.717962
phylum	rs74037001	-0.0811109	0.147865	0.583315
phylum	rs75211493	-0.069395	0.148463	0.640197
phylum	rs7570971	0.0150158	0.152604	0.921617
phylum	rs80124826	-0.0631632	0.147969	0.669476
phylum	rs857444	-0.042625	0.147411	0.772461
phylum	rs9833771	-0.1146	0.138559	0.408188
phylum	rs17343978	-0.105223	0.150879	0.485554
phylum	rs2032750	-0.154603	0.17533	0.377892
phylum	rs62531359	-0.164424	0.176314	0.351046
phylum	rs62575403	-0.188913	0.179173	0.291716
phylum	rs6586324	-0.20689	0.171104	0.226607
phylum	rs72706335	-0.232875	0.180117	0.196042
phylum	rs73512608	-0.186303	0.178282	0.296027
phylum	rs73846128	-0.209502	0.170282	0.218577
phylum	rs73975615	-0.0955189	0.141614	0.499994
phylum	rs929878	-0.21245	0.16749	0.204645
phylum	rs12555298	-0.168855	0.104319	0.105523
phylum	rs2585223	-0.2122	0.104305	0.0419086
phylum	rs584122	-0.15302	0.103975	0.141102
phylum	rs61972390	-0.162444	0.104294	0.119337
phylum	rs7148504	-0.14157	0.105259	0.178634
phylum	rs76531781	-0.126379	0.107848	0.241268
phylum	rs789068	-0.157692	0.105137	0.133649
phylum	rs9864379	-0.0821157	0.109679	0.454045
phylum	rs10202904	0.085154	0.0661626	0.19808
phylum	rs11022995	0.0771278	0.0655297	0.239199
phylum	rs34928225	0.0990996	0.0662942	0.134955
phylum	rs45498998	0.0835694	0.0650802	0.199107
phylum	rs6064552	0.092844	0.065091	0.153761
phylum	rs6508769	0.0788594	0.0657059	0.230066
phylum	rs7015093	0.0911973	0.065531	0.164024
phylum	rs76029318	0.0701746	0.0655958	0.284708
phylum	rs7635189	0.0805165	0.0657284	0.22058
phylum	rs77658038	0.0481181	0.0672475	0.474277
phylum	rs894996	0.0681631	0.065552	0.298418
phylum	rs112334273	0.162267	0.109143	0.137085
phylum	rs2273429	0.13078	0.10751	0.223818
phylum	rs2332027	0.139545	0.107939	0.196074
phylum	rs2547978	0.15658	0.107751	0.14618
phylum	rs3792064	0.129673	0.107234	0.226566
phylum	rs3852931	0.165975	0.10784	0.123783
phylum	rs4750583	0.152865	0.108091	0.157297
phylum	rs56199908	0.136036	0.114378	0.234298
phylum	rs6814436	0.161385	0.108	0.135094
phylum	rs6815608	0.172295	0.110974	0.120524
phylum	rs7247191	0.13105	0.107494	0.222793
phylum	rs72738886	0.159586	0.107834	0.138892
phylum	rs72771021	0.162662	0.111698	0.145319
phylum	rs8085381	0.148176	0.108329	0.171362
phylum	rs992074	0.126813	0.111453	0.255195
phylum	rs1002941	0.0878054	0.0809797	0.278237
phylum	rs11770843	0.0744439	0.082227	0.365282
phylum	rs17114848	0.086213	0.0805544	0.284509
phylum	rs2031282	0.0735135	0.0807921	0.36287
phylum	rs2825714	0.03288	0.0820472	0.688608
phylum	rs60995569	0.0567773	0.081753	0.48737
phylum	rs62570196	0.0819067	0.0803994	0.308323
phylum	rs72640280	0.034337	0.0818692	0.674915
phylum	rs77599476	0.0751281	0.0823841	0.361809
phylum	rs10750258	-0.14319	0.127377	0.26095
phylum	rs11126162	-0.152639	0.126477	0.22749
[truncated: 34 more rows]
