# Supplementary material for: Investigating the Causal Relationship of Gut Microbiota with Psoriasis and Psoriatic Arthritis: A Bidirectional Two-Sample Mendelian Randomization Study.
Source: Preprints.org preprint supplement (doi:10.20944/preprints202306.1726.v1), 2023-06-25
Supplement: Supplementary file 3 [file Supplementary Table 1.xlsx]

## Sheet: Supplementary Table 1
id	trait	group_name	year	author	pmid	population	sample_size	nsnp	build
ebi-a-GCST90016908	Gut microbiota abundance (class Actinobacteria id.419)	public	2021	Kurilshikov A	33462485	European	14306	5684804	HG19/GRCh37
ebi-a-GCST90016909	Gut microbiota abundance (class Alphaproteobacteria id.2379)	public	2021	Kurilshikov A	33462485	European	14306	5470627	HG19/GRCh37
ebi-a-GCST90016910	Gut microbiota abundance (class Bacilli id.1673)	public	2021	Kurilshikov A	33462485	European	14306	5663902	HG19/GRCh37
ebi-a-GCST90016911	Gut microbiota abundance (class Bacteroidia id.912)	public	2021	Kurilshikov A	33462485	European	14306	5729267	HG19/GRCh37
ebi-a-GCST90016912	Gut microbiota abundance (class Betaproteobacteria id.2867)	public	2021	Kurilshikov A	33462485	European	14306	5707741	HG19/GRCh37
ebi-a-GCST90016913	Gut microbiota abundance (class Clostridia id.1859)	public	2021	Kurilshikov A	33462485	European	14306	5729268	HG19/GRCh37
ebi-a-GCST90016914	Gut microbiota abundance (class Coriobacteriia id.809)	public	2021	Kurilshikov A	33462485	European	14306	5698092	HG19/GRCh37
ebi-a-GCST90016915	Gut microbiota abundance (class Deltaproteobacteria id.3087)	public	2021	Kurilshikov A	33462485	European	14306	5616854	HG19/GRCh37
ebi-a-GCST90016916	Gut microbiota abundance (class Erysipelotrichia id.2147)	public	2021	Kurilshikov A	33462485	European	14306	5720820	HG19/GRCh37
ebi-a-GCST90016917	Gut microbiota abundance (class Gammaproteobacteria id.3303)	public	2021	Kurilshikov A	33462485	European	14306	5689849	HG19/GRCh37
ebi-a-GCST90016918	Gut microbiota abundance (class Lentisphaeria id.2250)	public	2021	Kurilshikov A	33462485	European	14306	5282234	HG19/GRCh37
ebi-a-GCST90016919	Gut microbiota abundance (class Melainabacteria id.1589)	public	2021	Kurilshikov A	33462485	European	14306	5355624	HG19/GRCh37
ebi-a-GCST90016920	Gut microbiota abundance (class Methanobacteria id.119)	public	2021	Kurilshikov A	33462485	European	14306	5118613	HG19/GRCh37
ebi-a-GCST90016921	Gut microbiota abundance (class Mollicutes id.3920)	public	2021	Kurilshikov A	33462485	European	14306	5510407	HG19/GRCh37
ebi-a-GCST90016922	Gut microbiota abundance (class Negativicutes id.2164)	public	2021	Kurilshikov A	33462485	European	14306	5721008	HG19/GRCh37
ebi-a-GCST90016923	Gut microbiota abundance (class Verrucomicrobiae id.4029)	public	2021	Kurilshikov A	33462485	European	14306	5518011	HG19/GRCh37
ebi-a-GCST90016924	Gut microbiota abundance (family Acidaminococcaceae id.2166)	public	2021	Kurilshikov A	33462485	European	14306	5547067	HG19/GRCh37
ebi-a-GCST90016925	Gut microbiota abundance (family Actinomycetaceae id.421)	public	2021	Kurilshikov A	33462485	European	14306	5424030	HG19/GRCh37
ebi-a-GCST90016926	Gut microbiota abundance (family Alcaligenaceae id.2875)	public	2021	Kurilshikov A	33462485	European	14306	5696994	HG19/GRCh37
ebi-a-GCST90016927	Gut microbiota abundance (family Bacteroidaceae id.917)	public	2021	Kurilshikov A	33462485	European	14306	5729148	HG19/GRCh37
ebi-a-GCST90016928	Gut microbiota abundance (family Bacteroidales S24 7group id.11173)	public	2021	Kurilshikov A	33462485	European	14306	5432872	HG19/GRCh37
ebi-a-GCST90016929	Gut microbiota abundance (family Bifidobacteriaceae id.433)	public	2021	Kurilshikov A	33462485	European	14306	5668532	HG19/GRCh37
ebi-a-GCST90016930	Gut microbiota abundance (family Christensenellaceae id.1866)	public	2021	Kurilshikov A	33462485	European	14306	1515865	HG19/GRCh37
ebi-a-GCST90016931	Gut microbiota abundance (family Clostridiaceae1 id.1869)	public	2021	Kurilshikov A	33462485	European	14306	5598586	HG19/GRCh37
ebi-a-GCST90016932	Gut microbiota abundance (family Clostridiales vadin BB60 group id.11286)	public	2021	Kurilshikov A	33462485	European	14306	5497800	HG19/GRCh37
ebi-a-GCST90016933	Gut microbiota abundance (family Coriobacteriaceae id.811)	public	2021	Kurilshikov A	33462485	European	14306	5698092	HG19/GRCh37
ebi-a-GCST90016934	Gut microbiota abundance (family Defluviitaleaceae id.1924)	public	2021	Kurilshikov A	33462485	European	14306	5440708	HG19/GRCh37
ebi-a-GCST90016935	Gut microbiota abundance (family Desulfovibrionaceae id.3169)	public	2021	Kurilshikov A	33462485	European	14306	5616478	HG19/GRCh37
ebi-a-GCST90016936	Gut microbiota abundance (family Enterobacteriaceae id.3469)	public	2021	Kurilshikov A	33462485	European	14306	5598485	HG19/GRCh37
ebi-a-GCST90016937	Gut microbiota abundance (family Erysipelotrichaceae id.2149)	public	2021	Kurilshikov A	33462485	European	14306	5720820	HG19/GRCh37
ebi-a-GCST90016938	Gut microbiota abundance (family Family XI id.1936)	public	2021	Kurilshikov A	33462485	European	14306	4330602	HG19/GRCh37
ebi-a-GCST90016939	Gut microbiota abundance (family Family XIII id.1957)	public	2021	Kurilshikov A	33462485	European	14306	5620554	HG19/GRCh37
ebi-a-GCST90016940	Gut microbiota abundance (family Lachnospiraceae id.1987)	public	2021	Kurilshikov A	33462485	European	14306	5729268	HG19/GRCh37
ebi-a-GCST90016941	Gut microbiota abundance (family Lactobacillaceae id.1836)	public	2021	Kurilshikov A	33462485	European	14306	5401891	HG19/GRCh37
ebi-a-GCST90016942	Gut microbiota abundance (family Methanobacteriaceae id.121)	public	2021	Kurilshikov A	33462485	European	14306	5118613	HG19/GRCh37
ebi-a-GCST90016943	Gut microbiota abundance (family Oxalobacteraceae id.2966)	public	2021	Kurilshikov A	33462485	European	14306	5323881	HG19/GRCh37
ebi-a-GCST90016944	Gut microbiota abundance (family Pasteurellaceae id.3689)	public	2021	Kurilshikov A	33462485	European	14306	5491834	HG19/GRCh37
ebi-a-GCST90016945	Gut microbiota abundance (family Peptococcaceae id.2024)	public	2021	Kurilshikov A	33462485	European	14306	5490085	HG19/GRCh37
ebi-a-GCST90016946	Gut microbiota abundance (family Peptostreptococcaceae id.2042)	public	2021	Kurilshikov A	33462485	European	14306	5643812	HG19/GRCh37
ebi-a-GCST90016947	Gut microbiota abundance (family Porphyromonadaceae id.943)	public	2021	Kurilshikov A	33462485	European	14306	5716664	HG19/GRCh37
ebi-a-GCST90016948	Gut microbiota abundance (family Prevotellaceae id.960)	public	2021	Kurilshikov A	33462485	European	14306	5643858	HG19/GRCh37
ebi-a-GCST90016949	Gut microbiota abundance (family Rhodospirillaceae id.2717)	public	2021	Kurilshikov A	33462485	European	14306	5444973	HG19/GRCh37
ebi-a-GCST90016950	Gut microbiota abundance (family Rikenellaceae id.967)	public	2021	Kurilshikov A	33462485	European	14306	5665279	HG19/GRCh37
ebi-a-GCST90016951	Gut microbiota abundance (family Ruminococcaceae id.2050)	public	2021	Kurilshikov A	33462485	European	14306	5729189	HG19/GRCh37
ebi-a-GCST90016952	Gut microbiota abundance (family Streptococcaceae id.1850)	public	2021	Kurilshikov A	33462485	European	14306	5648128	HG19/GRCh37
ebi-a-GCST90016956	Gut microbiota abundance (family Veillonellaceae id.2172)	public	2021	Kurilshikov A	33462485	European	14306	5688519	HG19/GRCh37
ebi-a-GCST90016957	Gut microbiota abundance (family Verrucomicrobiaceae id.4036)	public	2021	Kurilshikov A	33462485	European	14306	5518011	HG19/GRCh37
ebi-a-GCST90016958	Gut microbiota abundance (family Victivallaceae id.2255)	public	2021	Kurilshikov A	33462485	European	14306	5184073	HG19/GRCh37
ebi-a-GCST90016959	Gut microbiota abundance (genus Actinomyces id.423)	public	2021	Kurilshikov A	33462485	European	14306	5417207	HG19/GRCh37
ebi-a-GCST90016960	Gut microbiota abundance (genus Adlercreutzia id.812)	public	2021	Kurilshikov A	33462485	European	14306	5437332	HG19/GRCh37
ebi-a-GCST90016961	Gut microbiota abundance (genus Akkermansia id.4037)	public	2021	Kurilshikov A	33462485	European	14306	5518001	HG19/GRCh37
ebi-a-GCST90016962	Gut microbiota abundance (genus Alistipes id.968)	public	2021	Kurilshikov A	33462485	European	14306	5662599	HG19/GRCh37
ebi-a-GCST90016963	Gut microbiota abundance (genus Allisonella id.2174)	public	2021	Kurilshikov A	33462485	European	14306	4116508	HG19/GRCh37
ebi-a-GCST90016964	Gut microbiota abundance (genus Alloprevotella id.961)	public	2021	Kurilshikov A	33462485	European	14306	3047413	HG19/GRCh37
ebi-a-GCST90016965	Gut microbiota abundance (genus Anaerofilum id.2053)	public	2021	Kurilshikov A	33462485	European	14306	5321133	HG19/GRCh37
ebi-a-GCST90016966	Gut microbiota abundance (genus Anaerostipes id.1991)	public	2021	Kurilshikov A	33462485	European	14306	5691265	HG19/GRCh37
ebi-a-GCST90016967	Gut microbiota abundance (genus Anaerotruncus id.2054)	public	2021	Kurilshikov A	33462485	European	14306	5646976	HG19/GRCh37
ebi-a-GCST90016968	Gut microbiota abundance (genus Bacteroides id.918)	public	2021	Kurilshikov A	33462485	European	14306	5729148	HG19/GRCh37
ebi-a-GCST90016969	Gut microbiota abundance (genus Barnesiella id.944)	public	2021	Kurilshikov A	33462485	European	14306	5561375	HG19/GRCh37
ebi-a-GCST90016970	Gut microbiota abundance (genus Bifidobacterium id.436)	public	2021	Kurilshikov A	33462485	European	14306	5666549	HG19/GRCh37
ebi-a-GCST90016971	Gut microbiota abundance (genus Bilophila id.3170)	public	2021	Kurilshikov A	33462485	European	14306	5552365	HG19/GRCh37
ebi-a-GCST90016972	Gut microbiota abundance (genus Blautia id.1992)	public	2021	Kurilshikov A	33462485	European	14306	335714	HG19/GRCh37
ebi-a-GCST90016973	Gut microbiota abundance (genus Butyricicoccus id.2055)	public	2021	Kurilshikov A	33462485	European	14306	5648432	HG19/GRCh37
ebi-a-GCST90016974	Gut microbiota abundance (genus Butyricimonas id.945)	public	2021	Kurilshikov A	33462485	European	14306	5487648	HG19/GRCh37
ebi-a-GCST90016975	Gut microbiota abundance (genus Butyrivibrio id.1993)	public	2021	Kurilshikov A	33462485	European	14306	5096306	HG19/GRCh37
ebi-a-GCST90016976	Gut microbiota abundance (genus Candidatus Soleaferrea id.11350)	public	2021	Kurilshikov A	33462485	European	14306	5372145	HG19/GRCh37
ebi-a-GCST90016977	Gut microbiota abundance (genus Catenibacterium id.2153)	public	2021	Kurilshikov A	33462485	European	14306	4089327	HG19/GRCh37
ebi-a-GCST90016978	Gut microbiota abundance (genus Christensenellaceae R 7group id.11283)	public	2021	Kurilshikov A	33462485	European	14306	5645310	HG19/GRCh37
ebi-a-GCST90016979	Gut microbiota abundance (genus Clostridium innocuum group id.14397)	public	2021	Kurilshikov A	33462485	European	14306	5231958	HG19/GRCh37
ebi-a-GCST90016980	Gut microbiota abundance (genus Clostridium sensustricto1 id.1873)	public	2021	Kurilshikov A	33462485	European	14306	5594934	HG19/GRCh37
ebi-a-GCST90016981	Gut microbiota abundance (genus Collinsella id.815)	public	2021	Kurilshikov A	33462485	European	14306	5563963	HG19/GRCh37
ebi-a-GCST90016982	Gut microbiota abundance (genus Coprobacter id.949)	public	2021	Kurilshikov A	33462485	European	14306	5394658	HG19/GRCh37
ebi-a-GCST90016983	Gut microbiota abundance (genus Coprococcus1 id.11301)	public	2021	Kurilshikov A	33462485	European	14306	5649452	HG19/GRCh37
ebi-a-GCST90016984	Gut microbiota abundance (genus Coprococcus2 id.11302)	public	2021	Kurilshikov A	33462485	European	14306	5525173	HG19/GRCh37
ebi-a-GCST90016985	Gut microbiota abundance (genus Coprococcus3 id.11303)	public	2021	Kurilshikov A	33462485	European	14306	5637737	HG19/GRCh37
ebi-a-GCST90016986	Gut microbiota abundance (genus Defluviitaleaceae UCG011 id.11287)	public	2021	Kurilshikov A	33462485	European	14306	5440169	HG19/GRCh37
ebi-a-GCST90016987	Gut microbiota abundance (genus Desulfovibrio id.3173)	public	2021	Kurilshikov A	33462485	European	14306	5459163	HG19/GRCh37
ebi-a-GCST90016988	Gut microbiota abundance (genus Dialister id.2183)	public	2021	Kurilshikov A	33462485	European	14306	5553148	HG19/GRCh37
ebi-a-GCST90016989	Gut microbiota abundance (genus Dorea id.1997)	public	2021	Kurilshikov A	33462485	European	14306	5702812	HG19/GRCh37
ebi-a-GCST90016990	Gut microbiota abundance (genus Eggerthella id.819)	public	2021	Kurilshikov A	33462485	European	14306	5317951	HG19/GRCh37
ebi-a-GCST90016991	Gut microbiota abundance (genus Eisenbergiella id.11304)	public	2021	Kurilshikov A	33462485	European	14306	5348517	HG19/GRCh37
ebi-a-GCST90016992	Gut microbiota abundance (genus Enterorhabdus id.820)	public	2021	Kurilshikov A	33462485	European	14306	5416385	HG19/GRCh37
ebi-a-GCST90016993	Gut microbiota abundance (genus Erysipelatoclostridium id.11381)	public	2021	Kurilshikov A	33462485	European	14306	5478224	HG19/GRCh37
ebi-a-GCST90016994	Gut microbiota abundance (genus Erysipelotrichaceae UCG003 id.11384)	public	2021	Kurilshikov A	33462485	European	14306	563252	HG19/GRCh37
ebi-a-GCST90016995	Gut microbiota abundance (genus Escherichia Shigella id.3504)	public	2021	Kurilshikov A	33462485	European	14306	5537082	HG19/GRCh37
ebi-a-GCST90016996	Gut microbiota abundance (genus Eubacterium brachy group id.11296)	public	2021	Kurilshikov A	33462485	European	14306	5221253	HG19/GRCh37
ebi-a-GCST90016997	Gut microbiota abundance (genus Eubacterium coprostanoligenes group id.11375)	public	2021	Kurilshikov A	33462485	European	14306	5699448	HG19/GRCh37
ebi-a-GCST90016998	Gut microbiota abundance (genus Eubacterium eligens group id.14372)	public	2021	Kurilshikov A	33462485	European	14306	5631614	HG19/GRCh37
ebi-a-GCST90016999	Gut microbiota abundance (genus Eubacterium fissicatena group id.14373)	public	2021	Kurilshikov A	33462485	European	14306	5159588	HG19/GRCh37
ebi-a-GCST90017000	Gut microbiota abundance (genus Eubacterium hallii group id.11338)	public	2021	Kurilshikov A	33462485	European	14306	5686593	HG19/GRCh37
ebi-a-GCST90017001	Gut microbiota abundance (genus Eubacterium nodatum group id.11297)	public	2021	Kurilshikov A	33462485	European	14306	5050598	HG19/GRCh37
ebi-a-GCST90017002	Gut microbiota abundance (genus Eubacterium oxidoreducens group id.11339)	public	2021	Kurilshikov A	33462485	European	14306	5324438	HG19/GRCh37
ebi-a-GCST90017003	Gut microbiota abundance (genus Eubacterium rectale group id.14374)	public	2021	Kurilshikov A	33462485	European	14306	5708381	HG19/GRCh37
ebi-a-GCST90017004	Gut microbiota abundance (genus Eubacterium ruminantium group id.11340)	public	2021	Kurilshikov A	33462485	European	14306	5427661	HG19/GRCh37
ebi-a-GCST90017005	Gut microbiota abundance (genus Eubacterium ventriosum group id.11341)	public	2021	Kurilshikov A	33462485	European	14306	5603754	HG19/GRCh37
ebi-a-GCST90017006	Gut microbiota abundance (genus Eubacterium xylanophilum group id.14375)	public	2021	Kurilshikov A	33462485	European	14306	5543813	HG19/GRCh37
ebi-a-GCST90017007	Gut microbiota abundance (genus Faecalibacterium id.2057)	public	2021	Kurilshikov A	33462485	European	14306	5720140	HG19/GRCh37
ebi-a-GCST90017008	Gut microbiota abundance (genus Family XIII AD3011 group id.11293)	public	2021	Kurilshikov A	33462485	European	14306	5577002	HG19/GRCh37
ebi-a-GCST90017009	Gut microbiota abundance (genus Family XIII UCG001 id.11294)	public	2021	Kurilshikov A	33462485	European	14306	5521084	HG19/GRCh37
ebi-a-GCST90017010	Gut microbiota abundance (genus Flavonifractor id.2059)	public	2021	Kurilshikov A	33462485	European	14306	5510045	HG19/GRCh37
ebi-a-GCST90017011	Gut microbiota abundance (genus Fusicatenibacter id.11305)	public	2021	Kurilshikov A	33462485	European	14306	5697232	HG19/GRCh37
ebi-a-GCST90017012	Gut microbiota abundance (genus Gordonibacter id.821)	public	2021	Kurilshikov A	33462485	European	14306	5165457	HG19/GRCh37
ebi-a-GCST90017013	Gut microbiota abundance (genus Haemophilus id.3698)	public	2021	Kurilshikov A	33462485	European	14306	5481944	HG19/GRCh37
ebi-a-GCST90017014	Gut microbiota abundance (genus Holdemanella id.11393)	public	2021	Kurilshikov A	33462485	European	14306	5421763	HG19/GRCh37
ebi-a-GCST90017015	Gut microbiota abundance (genus Holdemania id.2157)	public	2021	Kurilshikov A	33462485	European	14306	5464928	HG19/GRCh37
ebi-a-GCST90017016	Gut microbiota abundance (genus Howardella id.2000)	public	2021	Kurilshikov A	33462485	European	14306	5174541	HG19/GRCh37
ebi-a-GCST90017017	Gut microbiota abundance (genus Hungatella id.11306)	public	2021	Kurilshikov A	33462485	European	14306	5211608	HG19/GRCh37
ebi-a-GCST90017018	Gut microbiota abundance (genus Intestinibacter id.11345)	public	2021	Kurilshikov A	33462485	European	14306	5535009	HG19/GRCh37
ebi-a-GCST90017019	Gut microbiota abundance (genus Intestinimonas id.2062)	public	2021	Kurilshikov A	33462485	European	14306	5540147	HG19/GRCh37
ebi-a-GCST90017020	Gut microbiota abundance (genus Lachnoclostridium id.11308)	public	2021	Kurilshikov A	33462485	European	14306	5714724	HG19/GRCh37
ebi-a-GCST90017029	Gut microbiota abundance (genus Lachnospira id.2004)	public	2021	Kurilshikov A	33462485	European	14306	462269	HG19/GRCh37
ebi-a-GCST90017021	Gut microbiota abundance (genus Lachnospiraceae FCS020 group id.11314)	public	2021	Kurilshikov A	33462485	European	14306	5547835	HG19/GRCh37
ebi-a-GCST90017022	Gut microbiota abundance (genus Lachnospiraceae NC2004 group id.11316)	public	2021	Kurilshikov A	33462485	European	14306	5369940	HG19/GRCh37
ebi-a-GCST90017023	Gut microbiota abundance (genus Lachnospiraceae ND3007 group id.11317)	public	2021	Kurilshikov A	33462485	European	14306	5629458	HG19/GRCh37
ebi-a-GCST90017024	Gut microbiota abundance (genus Lachnospiraceae NK4A136 group id.11319)	public	2021	Kurilshikov A	33462485	European	14306	5663428	HG19/GRCh37
ebi-a-GCST90017025	Gut microbiota abundance (genus Lachnospiraceae UCG001 id.11321)	public	2021	Kurilshikov A	33462485	European	14306	5482153	HG19/GRCh37
ebi-a-GCST90017026	Gut microbiota abundance (genus Lachnospiraceae UCG004 id.11324)	public	2021	Kurilshikov A	33462485	European	14306	5633244	HG19/GRCh37
ebi-a-GCST90017027	Gut microbiota abundance (genus Lachnospiraceae UCG008 id.11328)	public	2021	Kurilshikov A	33462485	European	14306	5401028	HG19/GRCh37
ebi-a-GCST90017028	Gut microbiota abundance (genus Lachnospiraceae UCG010 id.11330)	public	2021	Kurilshikov A	33462485	European	14306	5565113	HG19/GRCh37
ebi-a-GCST90017030	Gut microbiota abundance (genus Lactobacillus id.1837)	public	2021	Kurilshikov A	33462485	European	14306	5398287	HG19/GRCh37
ebi-a-GCST90017031	Gut microbiota abundance (genus Lactococcus id.1851)	public	2021	Kurilshikov A	33462485	European	14306	5200746	HG19/GRCh37
ebi-a-GCST90017032	Gut microbiota abundance (genus Marvinbryantia id.2005)	public	2021	Kurilshikov A	33462485	European	14306	5507087	HG19/GRCh37
ebi-a-GCST90017033	Gut microbiota abundance (genus Methanobrevibacter id.123)	public	2021	Kurilshikov A	33462485	European	14306	5092705	HG19/GRCh37
ebi-a-GCST90017034	Gut microbiota abundance (genus Odoribacter id.952)	public	2021	Kurilshikov A	33462485	European	14306	5584164	HG19/GRCh37
ebi-a-GCST90017035	Gut microbiota abundance (genus Olsenella id.822)	public	2021	Kurilshikov A	33462485	European	14306	5215565	HG19/GRCh37
ebi-a-GCST90017036	Gut microbiota abundance (genus Oscillibacter id.2063)	public	2021	Kurilshikov A	33462485	European	14306	5450090	HG19/GRCh37
ebi-a-GCST90017037	Gut microbiota abundance (genus Oscillospira id.2064)	public	2021	Kurilshikov A	33462485	European	14306	5487907	HG19/GRCh37
ebi-a-GCST90017038	Gut microbiota abundance (genus Oxalobacter id.2978)	public	2021	Kurilshikov A	33462485	European	14306	5290208	HG19/GRCh37
ebi-a-GCST90017039	Gut microbiota abundance (genus Parabacteroides id.954)	public	2021	Kurilshikov A	33462485	European	14306	5709019	HG19/GRCh37
ebi-a-GCST90017040	Gut microbiota abundance (genus Paraprevotella id.962)	public	2021	Kurilshikov A	33462485	European	14306	5407469	HG19/GRCh37
ebi-a-GCST90017041	Gut microbiota abundance (genus Parasutterella id.2892)	public	2021	Kurilshikov A	33462485	European	14306	5512811	HG19/GRCh37
ebi-a-GCST90017042	Gut microbiota abundance (genus Peptococcus id.2037)	public	2021	Kurilshikov A	33462485	European	14306	5350051	HG19/GRCh37
ebi-a-GCST90017043	Gut microbiota abundance (genus Phascolarctobacterium id.2168)	public	2021	Kurilshikov A	33462485	European	14306	5509695	HG19/GRCh37
ebi-a-GCST90017044	Gut microbiota abundance (genus Prevotella7 id.11182)	public	2021	Kurilshikov A	33462485	European	14306	5089245	HG19/GRCh37
ebi-a-GCST90017045	Gut microbiota abundance (genus Prevotella9 id.11183)	public	2021	Kurilshikov A	33462485	European	14306	5535200	HG19/GRCh37
ebi-a-GCST90017046	Gut microbiota abundance (genus Rikenellaceae RC9 gut group id.11191)	public	2021	Kurilshikov A	33462485	European	14306	4945903	HG19/GRCh37
ebi-a-GCST90017047	Gut microbiota abundance (genus Romboutsia id.11347)	public	2021	Kurilshikov A	33462485	European	14306	5594534	HG19/GRCh37
ebi-a-GCST90017048	Gut microbiota abundance (genus Roseburia id.2012)	public	2021	Kurilshikov A	33462485	European	14306	5712148	HG19/GRCh37
ebi-a-GCST90017049	Gut microbiota abundance (genus Ruminiclostridium5 id.11355)	public	2021	Kurilshikov A	33462485	European	14306	5653350	HG19/GRCh37
ebi-a-GCST90017050	Gut microbiota abundance (genus Ruminiclostridium6 id.11356)	public	2021	Kurilshikov A	33462485	European	14306	5557669	HG19/GRCh37
ebi-a-GCST90017051	Gut microbiota abundance (genus Ruminiclostridium9 id.11357)	public	2021	Kurilshikov A	33462485	European	14306	5649657	HG19/GRCh37
ebi-a-GCST90017052	Gut microbiota abundance (genus Ruminococcaceae NK4A214 group id.11358)	public	2021	Kurilshikov A	33462485	European	14306	5616365	HG19/GRCh37
ebi-a-GCST90017053	Gut microbiota abundance (genus Ruminococcaceae UCG002 id.11360)	public	2021	Kurilshikov A	33462485	European	14306	5694947	HG19/GRCh37
ebi-a-GCST90017054	Gut microbiota abundance (genus Ruminococcaceae UCG003 id.11361)	public	2021	Kurilshikov A	33462485	European	14306	5624730	HG19/GRCh37
ebi-a-GCST90017055	Gut microbiota abundance (genus Ruminococcaceae UCG004 id.11362)	public	2021	Kurilshikov A	33462485	European	14306	5478416	HG19/GRCh37
ebi-a-GCST90017056	Gut microbiota abundance (genus Ruminococcaceae UCG005 id.11363)	public	2021	Kurilshikov A	33462485	European	14306	5638483	HG19/GRCh37
ebi-a-GCST90017057	Gut microbiota abundance (genus Ruminococcaceae UCG009 id.11366)	public	2021	Kurilshikov A	33462485	European	14306	5418432	HG19/GRCh37
ebi-a-GCST90017058	Gut microbiota abundance (genus Ruminococcaceae UCG010 id.11367)	public	2021	Kurilshikov A	33462485	European	14306	5545122	HG19/GRCh37
ebi-a-GCST90017059	Gut microbiota abundance (genus Ruminococcaceae UCG011 id.11368)	public	2021	Kurilshikov A	33462485	European	14306	5176480	HG19/GRCh37
ebi-a-GCST90017060	Gut microbiota abundance (genus Ruminococcaceae UCG013 id.11370)	public	2021	Kurilshikov A	33462485	European	14306	5642029	HG19/GRCh37
ebi-a-GCST90017061	Gut microbiota abundance (genus Ruminococcaceae UCG014 id.11371)	public	2021	Kurilshikov A	33462485	European	14306	5582406	HG19/GRCh37
ebi-a-GCST90017064	Gut microbiota abundance (genus Ruminococcus gauvreauii group id.11342)	public	2021	Kurilshikov A	33462485	European	14306	5572328	HG19/GRCh37
ebi-a-GCST90017065	Gut microbiota abundance (genus Ruminococcus gnavus group id.14376)	public	2021	Kurilshikov A	33462485	European	14306	5381061	HG19/GRCh37
ebi-a-GCST90017066	Gut microbiota abundance (genus Ruminococcus torques group id.14377)	public	2021	Kurilshikov A	33462485	European	14306	5709224	HG19/GRCh37
ebi-a-GCST90017062	Gut microbiota abundance (genus Ruminococcus1 id.11373)	public	2021	Kurilshikov A	33462485	European	14306	5653204	HG19/GRCh37
ebi-a-GCST90017063	Gut microbiota abundance (genus Ruminococcus2 id.11374)	public	2021	Kurilshikov A	33462485	European	14306	5619774	HG19/GRCh37
ebi-a-GCST90017067	Gut microbiota abundance (genus Sellimonas id.14369)	public	2021	Kurilshikov A	33462485	European	14306	4950440	HG19/GRCh37
ebi-a-GCST90017068	Gut microbiota abundance (genus Senegalimassilia id.11160)	public	2021	Kurilshikov A	33462485	European	14306	5398286	HG19/GRCh37
ebi-a-GCST90017069	Gut microbiota abundance (genus Slackia id.825)	public	2021	Kurilshikov A	33462485	European	14306	5369110	HG19/GRCh37
ebi-a-GCST90017070	Gut microbiota abundance (genus Streptococcus id.1853)	public	2021	Kurilshikov A	33462485	European	14306	5643866	HG19/GRCh37
ebi-a-GCST90017071	Gut microbiota abundance (genus Subdoligranulum id.2070)	public	2021	Kurilshikov A	33462485	European	14306	5708796	HG19/GRCh37
ebi-a-GCST90017072	Gut microbiota abundance (genus Sutterella id.2896)	public	2021	Kurilshikov A	33462485	European	14306	5586151	HG19/GRCh37
ebi-a-GCST90017073	Gut microbiota abundance (genus Terrisporobacter id.11348)	public	2021	Kurilshikov A	33462485	European	14306	5391104	HG19/GRCh37
ebi-a-GCST90017074	Gut microbiota abundance (genus Turicibacter id.2162)	public	2021	Kurilshikov A	33462485	European	14306	5459137	HG19/GRCh37
ebi-a-GCST90017075	Gut microbiota abundance (genus Tyzzerella3 id.11335)	public	2021	Kurilshikov A	33462485	European	14306	5326934	HG19/GRCh37
ebi-a-GCST90017088	Gut microbiota abundance (genus Veillonella id.2198)	public	2021	Kurilshikov A	33462485	European	14306	5486191	HG19/GRCh37
ebi-a-GCST90017089	Gut microbiota abundance (genus Victivallis id.2256)	public	2021	Kurilshikov A	33462485	Mixed	1531	4291501	HG19/GRCh37
ebi-a-GCST90017090	Gut microbiota abundance (order Actinomycetales id.420)	public	2021	Kurilshikov A	33462485	European	14306	5424038	HG19/GRCh37
ebi-a-GCST90017091	Gut microbiota abundance (order Bacillales id.1674)	public	2021	Kurilshikov A	33462485	European	14306	4738158	HG19/GRCh37
ebi-a-GCST90017092	Gut microbiota abundance (order Bacteroidales id.913)	public	2021	Kurilshikov A	33462485	European	14306	5729267	HG19/GRCh37
ebi-a-GCST90017093	Gut microbiota abundance (order Bifidobacteriales id.432)	public	2021	Kurilshikov A	33462485	European	14306	5668532	HG19/GRCh37
ebi-a-GCST90017094	Gut microbiota abundance (order Burkholderiales id.2874)	public	2021	Kurilshikov A	33462485	European	14306	5707170	HG19/GRCh37
ebi-a-GCST90017095	Gut microbiota abundance (order Clostridiales id.1863)	public	2021	Kurilshikov A	33462485	European	14306	5729268	HG19/GRCh37
ebi-a-GCST90017096	Gut microbiota abundance (order Coriobacteriales id.810)	public	2021	Kurilshikov A	33462485	European	14306	5698092	HG19/GRCh37
ebi-a-GCST90017097	Gut microbiota abundance (order Desulfovibrionales id.3156)	public	2021	Kurilshikov A	33462485	European	14306	5616504	HG19/GRCh37
ebi-a-GCST90017098	Gut microbiota abundance (order Enterobacteriales id.3468)	public	2021	Kurilshikov A	33462485	European	14306	5598485	HG19/GRCh37
ebi-a-GCST90017099	Gut microbiota abundance (order Erysipelotrichales id.2148)	public	2021	Kurilshikov A	33462485	European	14306	5720820	HG19/GRCh37
ebi-a-GCST90017100	Gut microbiota abundance (order Gastranaerophilales id.1591)	public	2021	Kurilshikov A	33462485	European	14306	5355169	HG19/GRCh37
ebi-a-GCST90017101	Gut microbiota abundance (order Lactobacillales id.1800)	public	2021	Kurilshikov A	33462485	European	14306	5662756	HG19/GRCh37
ebi-a-GCST90017102	Gut microbiota abundance (order Methanobacteriales id.120)	public	2021	Kurilshikov A	33462485	European	14306	5118613	HG19/GRCh37
ebi-a-GCST90017103	Gut microbiota abundance (order Mollicutes RF9 id.11579)	public	2021	Kurilshikov A	33462485	European	14306	5488779	HG19/GRCh37
ebi-a-GCST90017104	Gut microbiota abundance (order NB1n id.3953)	public	2021	Kurilshikov A	33462485	European	14306	5316331	HG19/GRCh37
ebi-a-GCST90017105	Gut microbiota abundance (order Pasteurellales id.3688)	public	2021	Kurilshikov A	33462485	European	14306	5491834	HG19/GRCh37
ebi-a-GCST90017106	Gut microbiota abundance (order Rhodospirillales id.2667)	public	2021	Kurilshikov A	33462485	European	14306	5447392	HG19/GRCh37
ebi-a-GCST90017107	Gut microbiota abundance (order Selenomonadales id.2165)	public	2021	Kurilshikov A	33462485	European	14306	5721008	HG19/GRCh37
ebi-a-GCST90017108	Gut microbiota abundance (order Verrucomicrobiales id.4030)	public	2021	Kurilshikov A	33462485	European	14306	5518011	HG19/GRCh37
ebi-a-GCST90017109	Gut microbiota abundance (order Victivallales id.2254)	public	2021	Kurilshikov A	33462485	European	14306	5282234	HG19/GRCh37
ebi-a-GCST90017110	Gut microbiota abundance (phylum Actinobacteria id.400)	public	2021	Kurilshikov A	33462485	European	14306	5706452	HG19/GRCh37
ebi-a-GCST90017111	Gut microbiota abundance (phylum Bacteroidetes id.905)	public	2021	Kurilshikov A	33462485	European	14306	5729267	HG19/GRCh37
ebi-a-GCST90017112	Gut microbiota abundance (phylum Cyanobacteria id.1500)	public	2021	Kurilshikov A	33462485	European	14306	5403633	HG19/GRCh37
ebi-a-GCST90017113	Gut microbiota abundance (phylum Euryarchaeota id.55)	public	2021	Kurilshikov A	33462485	European	14306	5165248	HG19/GRCh37
ebi-a-GCST90017114	Gut microbiota abundance (phylum Firmicutes id.1672)	public	2021	Kurilshikov A	33462485	European	14306	5729268	HG19/GRCh37
ebi-a-GCST90017115	Gut microbiota abundance (phylum Lentisphaerae id.2238)	public	2021	Kurilshikov A	33462485	European	14306	5282630	HG19/GRCh37
ebi-a-GCST90017116	Gut microbiota abundance (phylum Proteobacteria id.2375)	public	2021	Kurilshikov A	33462485	European	14306	5728442	HG19/GRCh37
ebi-a-GCST90017117	Gut microbiota abundance (phylum Tenericutes id.3919)	public	2021	Kurilshikov A	33462485	European	14306	5510407	HG19/GRCh37
ebi-a-GCST90017118	Gut microbiota abundance (phylum Verrucomicrobia id.3982)	public	2021	Kurilshikov A	33462485	European	14306	5530329	HG19/GRCh37
