# Supplementary material for: Investigating the Causal Relationship of Gut Microbiota with Psoriasis and Psoriatic Arthritis: A Bidirectional Two-Sample Mendelian Randomization Study.
Source: Preprints.org preprint supplement (doi:10.20944/preprints202306.1726.v1), 2023-06-25
Supplement: Supplementary file 4 [file Supplementary Table 2_Ps.xlsx]

## Sheet: Supplementary Table 2_Ps
	IVW		MR_Egger		Weighted_median		Weighted_mode
	pval	OR	pval	OR	pval	OR	pval	OR
class_Actinobacteria_id.419	0.918487	0.989652	0.84084	0.926493	0.0952652	0.788468	0.214886	0.785361
class_Alphaproteobacteria_id.2379	0.15981	1.18211	0.502062	0.724398	0.301998	1.17238	0.832484	1.04741
class_Bacilli_id.1673	0.365005	0.913272	0.353418	1.33761	0.834544	1.0301	0.638999	1.1089
class_Bacteroidia_id.912	0.325159	0.884777	0.779101	0.905001	0.930884	0.985211	0.941138	1.01664
class_Betaproteobacteria_id.2867	0.495296	1.09702	0.280062	1.64723	0.302769	1.2034	0.51342	1.19366
class_Clostridia_id.1859	0.731315	1.04198	0.335055	1.38903	0.805068	0.961457	0.911614	0.974343
class_Coriobacteriia_id.809	0.346282	0.890244	0.394781	0.628839	0.202151	0.819958	0.253188	0.753164
class_Deltaproteobacteria_id.3087	0.87037	1.02122	0.775144	1.25754	0.373687	0.841341	0.381839	0.749006
class_Erysipelotrichia_id.2147	0.0984175	0.808426	0.578315	0.726767	0.419282	0.869479	0.97764	0.991538
class_Gammaproteobacteria_id.3303	0.1891	1.26074	0.228995	2.14903	0.0544848	1.57094	0.172115	1.63024
class_Lentisphaeria_id.2250	0.487873	1.05852	0.519799	1.21992	0.896673	1.01397	0.844862	0.966446
class_Melainabacteria_id.1589	0.978938	0.997821	0.34706	0.778445	0.993708	0.999059	0.83997	0.95495
class_Methanobacteria_id.119	0.408065	1.06084	0.775536	1.08688	0.373635	1.08307	0.412688	1.10792
class_Mollicutes_id.3920	0.37562	1.09424	0.321626	1.53263	0.251259	1.1778	0.488415	1.16138
class_Negativicutes_id.2164	0.0905295	1.24307	0.595491	1.30579	0.556306	1.10843	0.663472	1.12503
class_Verrucomicrobiae_id.4029	0.540253	1.06792	0.874964	1.06481	0.942595	1.01029	0.880097	1.03397
family_Acidaminococcaceae_id.2166	0.2195	0.858392	0.0744629	0.376789	0.814918	0.959167	0.774427	1.0979
family_Actinomycetaceae_id.421	0.201811	1.18885	0.682225	1.18232	0.278422	1.20361	0.269376	1.29189
family_Alcaligenaceae_id.2875	0.401485	1.1196	0.503441	1.53876	0.490278	1.12581	0.624423	1.16204
family_Bacteroidaceae_id.917	0.122763	1.2822	0.457076	1.90403	0.200867	1.29214	0.42647	1.251
family_Bacteroidales_S24_7group_id.11173	0.946991	0.993355	0.462905	0.729493	0.865974	0.978786	0.436397	1.18388
family_Bifidobacteriaceae_id.433	0.168221	0.861443	0.876703	0.945171	0.0709443	0.764827	0.140413	0.753822
family_Clostridiaceae1_id.1869	0.650728	0.945848	0.911639	1.05731	0.875909	0.972733	0.825577	1.06219
family_Clostridiales_vadin_BB60_group_id.11286	0.502573	0.944013	0.164136	0.698863	0.169068	0.838831	0.128474	0.738803
family_Coriobacteriaceae_id.811	0.346282	0.890244	0.394781	0.628839	0.198741	0.819958	0.276279	0.753164
family_Defluviitaleaceae_id.1924	0.702286	0.964284	0.788607	0.914112	0.877031	0.981086	0.976605	1.00608
family_Desulfovibrionaceae_id.3169	0.54611	0.915058	0.330269	2.10811	0.297876	0.816268	0.49162	0.781912
family_Enterobacteriaceae_id.3469	0.547411	0.911264	0.231237	0.284346	0.886568	0.97015	0.75725	1.11107
family_Erysipelotrichaceae_id.2149	0.0984175	0.808426	0.578315	0.726767	0.402849	0.869479	0.976242	0.991538
family_Family_XI_id.1936	0.0551358	0.881138	0.546113	0.764378	0.125622	0.878998	0.40214	0.893164
family_Family_XIII_id.1957	0.176859	0.796345	0.387435	1.81881	0.413088	0.829586	0.652504	0.851738
family_Lachnospiraceae_id.1987	0.771364	0.966493	0.337728	1.49951	0.796204	0.959286	0.765203	0.919615
family_Lactobacillaceae_id.1836	0.539647	1.05628	0.766378	1.07187	0.679856	1.05241	0.913834	1.01567
family_Methanobacteriaceae_id.121	0.408065	1.06084	0.775536	1.08688	0.374978	1.08307	0.415291	1.10792
family_Oxalobacteraceae_id.2966	0.0738811	1.11768	0.880722	1.03753	0.350041	1.08332	0.765857	1.04591
family_Pasteurellaceae_id.3689	0.955385	0.995631	0.548419	0.898219	0.584956	0.941902	0.512913	0.915241
family_Peptococcaceae_id.2024	0.395497	0.913106	0.516622	1.24452	0.841835	0.97073	0.983286	1.00472
family_Peptostreptococcaceae_id.2042	0.516953	0.936687	0.337348	0.794214	0.393123	0.885688	0.466057	0.867771
family_Porphyromonadaceae_id.943	0.495413	0.896465	0.2983	0.356308	0.618781	0.892099	0.520922	0.7842
family_Prevotellaceae_id.960	0.0744627	0.831862	0.244123	0.638194	0.405034	0.889992	0.843324	0.954686
family_Rhodospirillaceae_id.2717	0.461044	1.05893	0.186305	0.630746	0.538049	1.06977	0.266329	1.24005
family_Rikenellaceae_id.967	0.980867	1.00257	0.113475	0.566085	0.727823	0.948271	0.808087	0.936994
family_Ruminococcaceae_id.2050	0.995053	1.00113	0.351257	0.667949	0.300149	1.21129	0.492441	1.191
family_Streptococcaceae_id.1850	0.973305	1.0044	0.6885	1.25139	0.870648	0.972264	0.499599	1.20928
family_Veillonellaceae_id.2172	0.526535	0.947014	0.708955	1.06826	0.846575	0.97579	0.751023	0.94994
family_Verrucomicrobiaceae_id.4036	0.540814	1.06784	0.876986	1.06372	0.946246	1.01	0.874514	1.03412
family_Victivallaceae_id.2255	0.533676	0.96423	0.455019	1.24171	0.605742	0.962747	0.544564	0.596997
genus_Actinomyces_id.423	0.425619	1.08664	0.613516	1.14715	0.747105	1.04531	0.672251	1.08401
genus_Adlercreutzia_id.812	0.192452	1.15636	0.208083	2.02036	0.534201	1.0969	0.991431	1.00265
genus_Akkermansia_id.4037	0.539233	1.06809	0.871276	1.06676	0.939499	1.01109	0.871281	1.03345
genus_Alistipes_id.968	0.606522	0.930736	0.745115	0.786419	0.909304	0.978594	0.969186	1.01231
genus_Allisonella_id.2174	0.394562	0.945608	0.911117	0.949549	0.333077	0.924485	0.488428	0.917582
genus_Alloprevotella_id.961	0.0466232	0.846701	0.751266	1.4478	0.28543	0.877192	0.927321	1.01915
genus_Anaerofilum_id.2053	0.431331	0.943389	0.294685	0.552878	0.218128	0.87514	0.305562	0.828423
genus_Anaerostipes_id.1991	0.359804	1.12101	0.720836	0.847232	0.871868	0.973124	0.624574	0.866422
genus_Anaerotruncus_id.2054	0.33473	1.12237	0.990583	0.995177	0.791875	1.04625	0.932009	1.02085
genus_Bacteroides_id.918	0.122763	1.2822	0.457076	1.90403	0.205539	1.29214	0.421712	1.251
genus_Barnesiella_id.944	0.849471	0.968184	0.307714	2.09389	0.486576	0.886854	0.597233	0.867958
genus_Bifidobacterium_id.436	0.842969	1.01973	0.744658	1.0838	0.88007	1.02109	0.346127	0.766575
genus_Bilophila_id.3170	0.597812	1.06049	0.470764	0.664263	0.197143	1.20081	0.344065	1.25022
genus_Butyricicoccus_id.2055	0.173794	0.830814	0.918303	1.03098	0.464767	0.86391	0.692103	0.903558
genus_Butyricimonas_id.945	0.620559	1.05253	0.182584	0.592183	0.666812	1.06052	0.684208	1.08777
genus_Butyrivibrio_id.1993	0.103897	0.921613	0.357142	1.22951	0.681731	0.973618	0.872206	0.984187
genus_Candidatus_Soleaferrea_id.11350	0.725229	1.03137	0.390615	0.44057	0.752421	1.03572	0.822684	1.03964
genus_Catenibacterium_id.2153	0.618617	0.951809	0.597443	0.351513	0.937715	1.00972	0.616137	1.11578
genus_Christensenellaceae_R_7group_id.11283	0.998885	1.00022	0.602171	0.703525	0.902355	0.97317	0.905949	0.959246
genus_Clostridium_innocuum_group_id.14397	0.103905	0.88037	0.316272	1.59116	0.663051	0.957326	0.840738	1.03311
genus_Clostridium_sensustricto1_id.1873	0.148511	0.830776	0.945383	1.02926	0.562189	0.902719	0.601307	1.15807
genus_Collinsella_id.815	0.412329	0.887898	0.262555	1.97981	0.849545	0.961986	0.852749	0.940868
genus_Coprobacter_id.949	0.819487	1.02013	0.312554	1.42915	0.401654	1.10368	0.407553	1.2006
genus_Coprococcus1_id.11301	0.45098	1.13867	0.853603	0.919827	0.398828	1.16416	0.423567	1.236
genus_Coprococcus2_id.11302	0.465947	0.909157	0.434915	2.36875	0.950603	1.01041	0.689122	1.11737
genus_Coprococcus3_id.11303	0.927017	1.01364	0.955614	0.95381	0.770877	1.05866	0.592706	1.17733
genus_Defluviitaleaceae_UCG011_id.11287	0.899707	0.986679	0.823678	0.914957	0.870629	1.02207	0.848604	1.04159
genus_Desulfovibrio_id.3173	0.663359	0.95359	0.0644736	0.492098	0.993439	0.998744	0.861459	0.957555
genus_Dialister_id.2183	0.607284	0.944116	0.644181	0.80343	0.959696	0.992168	0.360507	0.77175
genus_Dorea_id.1997	0.294689	0.860555	0.744617	1.18311	0.43864	0.857832	0.514298	0.837894
genus_Eggerthella_id.819	0.147953	0.891695	0.851633	1.09303	0.577191	0.937066	0.716762	0.931248
genus_Eisenbergiella_id.11304	0.63079	0.96388	0.388806	0.598694	0.341279	0.911075	0.385208	0.871709
genus_Enterorhabdus_id.820	0.971133	1.00441	0.864404	0.94336	0.843289	1.03239	0.846191	1.03863
genus_Erysipelatoclostridium_id.11381	0.767241	1.03535	0.214445	1.79974	0.840064	1.02654	0.905392	1.02536
genus_Escherichia_Shigella_id.3504	0.882831	0.98196	0.464133	0.744141	0.843738	1.03375	0.850245	1.05021
genus_Eubacterium_brachy_group_id.11296	0.926401	1.0064	0.328822	0.749706	0.507407	1.06063	0.519643	1.10333
genus_Eubacterium_coprostanoligenes_group_id.11375	0.744084	1.04252	0.82942	1.11658	0.905887	1.02026	0.977027	0.991385
genus_Eubacterium_eligens_group_id.14372	0.674478	0.933134	0.94058	1.05007	0.399915	0.84195	0.405838	0.778387
genus_Eubacterium_fissicatena_group_id.14373	0.00113932	1.27035	0.777311	0.893899	0.0243524	1.26856	0.16144	1.27501
genus_Eubacterium_hallii_group_id.11338	0.991045	1.00159	0.66119	1.1467	0.98515	0.996877	0.349423	1.3102
genus_Eubacterium_nodatum_group_id.11297	0.411699	0.951854	0.802746	0.933446	0.443722	0.940859	0.525047	0.928146
genus_Eubacterium_oxidoreducens_group_id.11339	0.425258	1.09201	0.970711	1.0165	0.726505	1.05031	0.994025	0.998487
genus_Eubacterium_rectale_group_id.14374	0.252993	1.18992	0.592917	1.36826	0.357398	1.20111	0.491914	1.21578
genus_Eubacterium_ruminantium_group_id.11340	0.169204	1.0959	0.492259	0.823903	0.188928	1.14208	0.177225	1.32372
genus_Eubacterium_ventriosum_group_id.11341	0.822508	1.02428	0.231705	1.82123	0.837869	0.97064	0.700571	0.893771
genus_Eubacterium_xylanophilum_group_id.14375	0.792294	0.969413	0.528084	1.26393	0.706025	0.94548	0.768104	0.934864
genus_Faecalibacterium_id.2057	0.269033	0.886594	0.46575	1.17663	0.945236	1.01012	0.92265	1.01686
genus_Family_XIII_AD3011_group_id.11293	0.592329	1.1151	0.458582	0.475626	0.91431	1.0177	0.730356	1.0937
genus_Family_XIII_UCG001_id.11294	0.312906	0.877295	0.955314	0.976935	0.602386	0.917148	0.323167	0.749415
genus_Flavonifractor_id.2059	0.879699	1.02337	0.731313	0.794746	0.77378	0.945751	0.718232	0.910806
genus_Fusicatenibacter_id.11305	0.150394	1.16446	0.775315	1.12204	0.398391	1.13127	0.635641	1.12106
genus_Gordonibacter_id.821	0.636378	0.969299	0.269433	0.729967	0.927194	1.008	0.56458	1.09284
genus_Haemophilus_id.3698	0.677267	0.962154	0.293302	0.790181	0.347675	0.894269	0.370762	0.853008
genus_Holdemanella_id.11393	0.514056	0.949066	0.118293	1.48733	0.613772	0.947179	0.711442	0.941483
genus_Holdemania_id.2157	0.33617	0.920858	0.738388	1.09847	0.645906	0.948901	0.656455	0.927221
genus_Howardella_id.2000	0.0700143	0.889197	0.881473	1.04252	0.250972	0.90693	0.526758	0.928603
genus_Hungatella_id.11306	0.330736	0.908153	0.468126	1.6853	0.158442	0.822922	0.303974	0.785366
genus_Intestinibacter_id.11345	0.747206	1.04675	0.766966	1.15574	0.236308	1.18717	0.361583	1.25202
genus_Intestinimonas_id.2062	0.96481	0.996053	0.630486	0.885294	0.872951	1.0193	0.772097	1.05778
genus_Lachnoclostridium_id.11308	0.349863	1.1202	0.629391	1.23593	0.40119	1.15576	0.355822	1.28655
genus_Lachnospiraceae_FCS020_group_id.11314	0.833024	1.02306	0.31103	1.39855	0.791983	0.959366	0.548705	0.83567
genus_Lachnospiraceae_NC2004_group_id.11316	0.537004	0.925716	0.774284	0.850734	0.341478	0.880356	0.467246	0.860465
genus_Lachnospiraceae_ND3007_group_id.11317	0.918548	1.0261	0.409964	371.101	0.693695	1.15121	0.570503	1.35987
genus_Lachnospiraceae_NK4A136_group_id.11319	0.92955	0.991571	0.0913	1.41731	0.850543	1.02783	0.794675	1.04366
genus_Lachnospiraceae_UCG001_id.11321	0.578667	1.0531	0.296264	1.62914	0.719755	1.04995	0.856653	0.953656
genus_Lachnospiraceae_UCG004_id.11324	0.495614	1.0856	0.861777	0.914315	0.302184	1.18038	0.485045	1.19873
genus_Lachnospiraceae_UCG008_id.11328	0.462119	1.06425	0.733612	0.859171	0.334711	1.11267	0.347405	1.21132
genus_Lachnospira_id.2004	0.0745896	0.79872	0.783783	1.11522	0.535227	0.899826	0.679438	0.898338
genus_Lactobacillus_id.1837	0.757402	0.973753	0.839984	1.04779	0.508319	0.926746	0.186309	0.810968
genus_Lactococcus_id.1851	0.00277553	1.24598	0.864651	0.943361	0.0717604	1.18529	0.353991	1.1408
genus_Marvinbryantia_id.2005	0.120707	0.829379	0.357588	0.601219	0.411517	0.872298	0.67069	0.894569
genus_Methanobrevibacter_id.123	0.306679	1.09575	0.502447	1.27946	0.14925	1.17674	0.233017	1.18364
genus_Odoribacter_id.952	0.0240033	0.713564	0.727005	0.841054	0.11382	0.726071	0.271383	0.718452
genus_Olsenella_id.822	0.715007	0.977181	0.263749	1.27615	0.666837	0.963675	0.380153	1.13225
genus_Oscillibacter_id.2063	0.478265	0.940852	0.136684	0.535257	0.100186	0.814832	0.240575	0.785383
genus_Oscillospira_id.2064	0.427405	0.910724	0.0798109	0.29436	0.730724	0.94262	0.828368	0.939379
genus_Oxalobacter_id.2978	0.271639	1.07518	0.298764	1.40678	0.867718	1.01559	0.97362	0.995245
genus_Parabacteroides_id.954	0.907529	0.978653	0.902091	0.782023	0.791278	0.935609	0.572935	0.81018
genus_Paraprevotella_id.962	0.961117	0.994473	0.885934	1.06812	0.789135	0.969032	0.842007	0.958061
genus_Parasutterella_id.2892	0.676282	0.964087	0.676683	1.10942	0.420199	0.902403	0.430654	0.866309
genus_Peptococcus_id.2037	0.387692	0.941349	0.938452	1.02154	0.55284	0.945007	0.206711	0.786166
genus_Phascolarctobacterium_id.2168	0.475752	1.09731	0.535625	1.51849	0.508685	1.11744	0.326502	1.28901
genus_Prevotella7_id.11182	0.521867	0.960821	0.982468	1.00821	0.914635	0.990817	0.707998	1.05458
genus_Prevotella9_id.11183	0.160548	0.893041	0.697318	0.910707	0.39626	0.907284	0.692388	0.92925
genus_Rikenellaceae_RC9_gut_group_id.11191	0.71344	0.978166	0.121035	0.526552	0.522908	0.948849	0.761833	0.961084
genus_Romboutsia_id.11347	0.0959518	1.19794	0.565581	1.20469	0.12667	1.24268	0.337957	1.25734
genus_Roseburia_id.2012	0.0664547	1.25411	0.24346	0.599628	0.433536	1.14855	0.7471	1.09219
genus_Ruminiclostridium5_id.11355	0.0429789	1.30884	0.738329	1.21089	0.560415	1.11508	0.761892	1.09922
genus_Ruminiclostridium6_id.11356	0.592576	1.05846	0.718338	1.10463	0.573274	0.920239	0.596223	0.873771
genus_Ruminiclostridium9_id.11357	0.76058	0.949843	0.268251	0.384466	0.986867	0.996207	0.843103	1.07506
genus_Ruminococcaceae_NK4A214_group_id.11358	0.439065	1.09106	0.209682	1.64038	0.201326	1.22309	0.298838	1.31795
genus_Ruminococcaceae_UCG002_id.11360	0.559838	0.948597	0.273985	0.734908	0.624239	1.07239	0.612208	1.12715
genus_Ruminococcaceae_UCG003_id.11361	0.938967	0.991673	0.933937	1.03429	0.755066	1.04716	0.634311	1.11476
genus_Ruminococcaceae_UCG004_id.11362	0.438355	1.07957	0.646856	1.33716	0.602671	1.07506	0.247157	1.30348
genus_Ruminococcaceae_UCG005_id.11363	0.710146	0.962961	0.618479	0.838738	0.759804	1.0466	0.774887	1.05825
genus_Ruminococcaceae_UCG009_id.11366	0.366517	1.07722	0.972512	1.01169	0.876842	1.01774	0.729957	1.06758
genus_Ruminococcaceae_UCG010_id.11367	0.921997	0.986067	0.457714	0.689659	0.888624	0.973321	0.453883	0.816145
genus_Ruminococcaceae_UCG011_id.11368	0.913282	0.992489	0.161518	1.93845	0.647632	0.957223	0.656464	0.944589
genus_Ruminococcaceae_UCG013_id.11370	0.7897	1.03343	0.156696	1.72802	0.547407	1.10577	0.727741	1.09888
genus_Ruminococcaceae_UCG014_id.11371	0.349758	1.10681	0.869805	1.0471	0.48036	1.11412	0.606389	1.08981
genus_Ruminococcus_gauvreauii_group_id.11342	0.654355	1.0524	0.358104	1.76371	0.735323	0.94727	0.498437	0.840969
genus_Ruminococcus_gnavus_group_id.14376	0.802934	0.971467	0.0885974	2.5297	0.982665	1.00278	0.814412	1.0579
genus_Ruminococcus_torques_group_id.14377	0.61038	1.09515	0.788718	1.2417	0.758165	0.925293	0.606393	0.792663
genus_Sellimonas_id.14369	0.37071	1.05622	0.261749	1.75223	0.699582	0.964553	0.508417	0.909032
genus_Senegalimassilia_id.11160	0.730979	0.954294	0.457193	1.85152	0.979493	0.995333	0.786039	0.933368
genus_Slackia_id.825	0.886792	1.01616	0.611969	1.49599	0.964558	1.00588	0.978592	1.00475
genus_Streptococcus_id.1853	0.83718	0.974431	0.764579	0.866632	0.882468	1.02532	0.527837	1.18146
genus_Subdoligranulum_id.2070	0.420338	0.902965	0.94699	1.02382	0.656013	0.922064	0.881612	0.96385
genus_Sutterella_id.2896	0.245502	0.879047	0.844654	1.10173	0.26065	0.850313	0.404117	0.828497
genus_Terrisporobacter_id.11348	0.831769	0.973081	0.54168	0.766727	0.53584	0.90216	0.644179	0.896041
genus_Turicibacter_id.2162	0.797549	0.973564	0.95411	1.0256	0.751655	0.960111	0.669224	0.922731
genus_Tyzzerella3_id.11335	0.744384	1.02285	0.608015	1.2336	0.982559	1.00211	0.855372	0.967294
genus_Veillonella_id.2198	0.342573	0.88017	0.455159	2.41412	0.394984	0.87639	0.569335	0.874744
genus_Victivallis_id.2256	0.250242	1.07673	0.618926	1.28875	0.464932	1.06167	0.581506	1.07912
order_Actinomycetales_id.420	0.20095	1.18939	0.679255	1.18463	1.20529	1.20529	0.249868	1.29073
order_Bacillales_id.1674	0.806475	0.983653	0.388776	0.777048	0.965175	0.965175	0.780342	0.958983
order_Bacteroidales_id.913	0.325159	0.884777	0.779101	0.905001	0.985211	0.985211	0.944178	1.01664
order_Bifidobacteriales_id.432	0.168221	0.861443	0.876703	0.945171	0.764827	0.764827	0.1713	0.753822
order_Burkholderiales_id.2874	0.523673	1.08921	0.2283	1.73783	1.16256	1.16256	0.531008	1.18872
order_Clostridiales_id.1863	0.969647	1.00447	0.422311	1.30474	0.957472	0.957472	0.92031	0.976152
order_Coriobacteriales_id.810	0.346282	0.890244	0.394781	0.628839	0.819958	0.819958	0.264328	0.753164
order_Desulfovibrionales_id.3156	0.798165	0.966288	0.436021	1.72877	0.849835	0.849835	0.483131	0.797782
order_Enterobacteriales_id.3468	0.547411	0.911264	0.231237	0.284346	0.97015	0.97015	0.783457	1.11107
order_Erysipelotrichales_id.2148	0.0984175	0.808426	0.578315	0.726767	0.869479	0.869479	0.975249	0.991538
order_Gastranaerophilales_id.1591	0.720107	0.969424	0.449978	0.804676	0.910064	0.910064	0.655456	0.893716
order_Lactobacillales_id.1800	0.30894	0.893191	0.758022	1.10668	1.00335	1.00335	0.72409	1.0779
order_Methanobacteriales_id.120	0.408065	1.06084	0.775536	1.08688	1.08307	1.08307	0.400123	1.10792
order_Mollicutes_RF9_id.11579	0.212002	1.12928	0.0913232	1.91222	1.18895	1.18895	0.332664	1.23726
order_NB1n_id.3953	0.577562	0.962488	0.863445	0.935548	0.998205	0.998205	0.959681	0.992914
order_Pasteurellales_id.3688	0.955385	0.995631	0.548419	0.898219	0.941902	0.941902	0.54775	0.915241
order_Rhodospirillales_id.2667	0.558334	1.04778	0.181201	0.632291	1.06771	1.06771	0.479151	0.882059
order_Selenomonadales_id.2165	0.0905295	1.24307	0.595491	1.30579	1.10843	1.10843	0.659056	1.12503
order_Verrucomicrobiales_id.4030	0.540253	1.06792	0.874964	1.06481	1.01029	1.01029	0.876382	1.03397
order_Victivallales_id.2254	0.487873	1.05852	0.519799	1.21992	1.01397	1.01397	0.841217	0.966446
phylum_Actinobacteria_id.400	0.575669	0.936933	0.665749	0.768009	0.236928	0.81954	0.271697	0.747283
phylum_Bacteroidetes_id.905	0.206075	0.839773	0.580571	0.808508	0.722745	0.934851	0.94975	1.01482
phylum_Cyanobacteria_id.1500	0.124726	0.85935	0.279412	0.658301	0.261959	0.866352	0.503332	0.872499
phylum_Euryarchaeota_id.55	0.204024	1.08291	0.400429	1.27781	0.372486	1.07542	0.648973	1.06225
phylum_Firmicutes_id.1672	0.156942	1.16072	0.303536	1.30147	0.573837	1.07986	0.990813	1.00245
phylum_Lentisphaerae_id.2238	0.381474	1.0695	0.467438	1.25119	0.878523	1.01602	0.897911	0.980345
phylum_Proteobacteria_id.2375	0.205485	0.855812	0.986256	0.993963	0.485026	0.891183	0.768134	0.934662
phylum_Tenericutes_id.3919	0.37562	1.09424	0.321626	1.53263	0.240466	1.1778	0.485451	1.16138
phylum_Verrucomicrobia_id.3982	0.758892	0.969229	0.96947	0.988832	0.55344	0.920248	0.587864	0.909874
