# Supplementary material for: Investigating the Causal Relationship of Gut Microbiota with Psoriasis and Psoriatic Arthritis: A Bidirectional Two-Sample Mendelian Randomization Study.
Source: Preprints.org preprint supplement (doi:10.20944/preprints202306.1726.v1), 2023-06-25
Supplement: Supplementary file 5 [file Supplementary Table 3_PsA.xlsx]

## Sheet: Supplementary Table 3_PsA
	IVW		MR Egger		Weighted median		Weighted mode
	pval	OR	pval	OR	pval	OR	pval	OR
class_Actinobacteria_id.419	0.557341	1.10006	0.808224	1.14566	0.736959	0.921237	0.402693	0.776857
class_Alphaproteobacteria_id.2379	0.888366	1.02711	0.440441	0.549856	0.773358	0.933295	0.62053	0.831862
class_Bacilli_id.1673	0.667731	0.933596	0.566688	0.773202	0.716035	0.922401	0.933885	0.973884
class_Bacteroidia_id.912	0.117986	0.656061	0.23908	1.96905	0.623367	0.866657	0.701394	0.861412
class_Betaproteobacteria_id.2867	0.608217	0.894727	0.645348	0.666913	0.781247	0.922879	0.896594	0.944146
class_Clostridia_id.1859	0.973751	0.993714	0.950118	1.03395	0.719612	0.912057	0.746315	0.900265
class_Coriobacteriia_id.809	0.391711	0.844362	0.23255	0.346839	0.512718	0.83534	0.541024	0.775306
class_Deltaproteobacteria_id.3087	0.596192	1.11511	0.874613	1.23985	0.302054	1.35363	0.407884	1.50976
class_Erysipelotrichia_id.2147	0.0879026	0.703769	0.881978	1.145	0.128341	0.664485	0.207531	0.581521
class_Gammaproteobacteria_id.3303	0.349798	1.30153	0.437201	2.08654	0.684412	1.15251	0.983269	1.01069
class_Lentisphaeria_id.2250	0.695366	0.950021	0.942741	1.03543	0.288251	0.835538	0.375015	0.762609
class_Melainabacteria_id.1589	0.492688	1.09485	0.417958	0.666637	0.546983	1.11573	0.689998	1.13661
class_Methanobacteria_id.119	0.114499	1.19718	0.768529	0.871702	0.203427	1.20591	0.310837	1.28681
class_Mollicutes_id.3920	0.374395	1.15567	0.918605	0.943699	0.776537	1.062	0.831255	1.07069
class_Negativicutes_id.2164	0.270784	1.44158	0.196025	4.80621	0.412284	1.30883	0.975851	1.01722
class_Verrucomicrobiae_id.4029	0.00602534	1.60176	0.793562	1.16748	0.0722302	1.54379	0.257506	1.45768
family_Acidaminococcaceae_id.2166	0.172551	0.762209	0.0731467	0.256	0.0795032	0.62567	0.128047	0.534903
family_Actinomycetaceae_id.421	0.547319	1.13957	0.673948	0.793615	0.857725	1.05031	0.925148	1.03096
family_Alcaligenaceae_id.2875	0.364682	1.21559	0.647088	0.626326	0.216373	1.42837	0.260579	1.84643
family_Bacteroidaceae_id.917	0.857821	1.04719	0.759933	1.51051	0.77911	0.908645	0.57576	0.75514
family_Bacteroidales_S24_7group_id.11173	0.629356	0.890652	0.765969	0.723755	0.376005	0.806404	0.686238	0.849283
family_Bifidobacteriaceae_id.433	0.641033	1.08404	0.579831	1.38224	0.842137	0.954453	0.533854	0.830128
family_Clostridiaceae1_id.1869	0.576313	0.895954	0.588581	1.38126	0.677949	1.12019	0.49501	1.33999
family_Clostridiales_vadin_BB60_group_id.11286	0.391194	0.888802	0.49826	0.75741	0.594886	0.902997	0.908816	0.963898
family_Coriobacteriaceae_id.811	0.391711	0.844362	0.23255	0.346839	0.510909	0.83534	0.570874	0.775306
family_Defluviitaleaceae_id.1924	0.825531	0.967028	0.78964	0.866964	0.993447	1.00158	0.686374	1.13355
family_Desulfovibrionaceae_id.3169	0.771581	1.07059	0.393739	2.92967	0.375805	1.31824	0.540941	1.36809
family_Enterobacteriaceae_id.3469	0.455444	1.20241	0.685343	1.88471	0.990907	0.996311	0.887294	0.938492
family_Erysipelotrichaceae_id.2149	0.0879026	0.703769	0.881978	1.145	0.121712	0.664485	0.244565	0.581521
family_Family_XI_id.1936	0.558365	0.94012	0.165193	0.345947	0.157785	0.819834	0.279836	0.795129
family_Family_XIII_id.1957	0.920828	0.973574	0.533891	1.95882	0.962186	1.01661	0.703149	1.22196
family_Lachnospiraceae_id.1987	0.776061	1.0548	0.325549	1.94503	0.785369	0.932925	0.580885	0.785227
family_Lactobacillaceae_id.1836	0.21318	1.1944	0.516566	1.27856	0.573767	1.10781	0.866652	1.03787
family_Methanobacteriaceae_id.121	0.114499	1.19718	0.768529	0.871702	0.221366	1.20591	0.288397	1.28681
family_Oxalobacteraceae_id.2966	0.552509	1.06094	0.881411	1.06039	0.856296	1.02538	0.820881	0.949589
family_Pasteurellaceae_id.3689	0.237915	1.15921	0.673602	0.886904	0.813183	1.04241	0.947227	1.01362
family_Peptococcaceae_id.2024	0.990652	1.00201	0.271448	1.7595	0.621424	1.11716	0.627065	1.19209
family_Peptostreptococcaceae_id.2042	0.0684591	0.745163	0.0510047	0.447521	0.128014	0.702339	0.145633	0.570095
family_Porphyromonadaceae_id.943	0.688696	1.1081	0.533715	2.22709	0.243094	1.51778	0.212726	2.0689
family_Prevotellaceae_id.960	0.478582	0.889499	0.281881	2.01642	0.426523	0.829478	0.816424	0.910228
family_Rhodospirillaceae_id.2717	0.433403	1.10232	0.187186	0.46609	0.640262	1.08636	0.444843	0.761088
family_Rikenellaceae_id.967	0.0344631	0.69604	0.0274394	0.274427	0.129676	0.681399	0.167081	0.511258
family_Ruminococcaceae_id.2050	0.897504	0.973767	0.350919	0.62807	0.807324	1.07386	0.805558	1.09895
family_Streptococcaceae_id.1850	0.850206	1.04046	0.341321	0.419005	0.561407	1.18688	0.46302	1.43435
family_Veillonellaceae_id.2172	0.77485	1.04008	0.340306	1.31334	0.6132	1.09799	0.661393	1.10716
family_Verrucomicrobiaceae_id.4036	0.00601254	1.60214	0.791685	1.16916	0.0731637	1.54385	0.277395	1.45746
family_Victivallaceae_id.2255	0.512609	0.940568	0.410035	1.46643	0.852245	1.02239	0.910922	1.02188
genus_Actinomyces_id.423	0.806864	1.04169	0.755562	0.874155	0.89437	1.02886	0.89397	1.0379
genus_Adlercreutzia_id.812	0.0511869	1.41569	0.183769	3.31476	0.252569	1.30382	0.676133	1.17209
genus_Akkermansia_id.4037	0.0059944	1.60214	0.789132	1.17136	0.0665008	1.54459	0.264054	1.45661
genus_Alistipes_id.968	0.901014	1.02815	0.361946	0.362724	0.428822	1.25589	0.500181	1.35738
genus_Allisonella_id.2174	0.950496	0.993499	0.498833	1.6682	0.209442	0.838391	0.387121	0.814023
genus_Alloprevotella_id.961	0.288729	0.867747	0.480762	4.36069	0.10548	0.724739	0.242154	0.689347
genus_Anaerofilum_id.2053	0.548212	0.894333	0.0575788	0.14933	0.374605	0.855082	0.455489	0.806859
genus_Anaerostipes_id.1991	0.46828	1.1557	0.891206	1.10655	0.743915	1.08955	0.648211	0.821195
genus_Anaerotruncus_id.2054	0.0576282	1.43857	0.436235	1.59527	0.149825	1.46661	0.389506	1.40852
genus_Bacteroides_id.918	0.857821	1.04719	0.759933	1.51051	0.773035	0.908645	0.608365	0.75514
genus_Barnesiella_id.944	0.401622	1.16937	0.0883514	4.22473	0.6799	1.11677	0.690239	1.21369
genus_Bifidobacterium_id.436	0.763257	1.04867	0.847248	0.926707	0.543766	0.880706	0.532748	0.854638
genus_Bilophila_id.3170	0.69358	1.07266	0.690662	0.693997	0.571171	0.870374	0.646949	0.836025
genus_Butyricicoccus_id.2055	0.102836	0.700689	0.888484	1.06456	0.493163	0.818786	0.796003	0.906895
genus_Butyricimonas_id.945	0.745093	0.947689	0.447113	0.628091	0.436462	0.838208	0.433184	0.709156
genus_Butyrivibrio_id.1993	0.537748	0.951718	0.372091	1.37746	0.717996	1.03903	0.327524	1.18558
genus_Candidatus_Soleaferrea_id.11350	0.80993	1.03435	0.973366	1.05074	0.783986	1.05206	0.940864	1.0208
genus_Catenibacterium_id.2153	0.828333	0.966173	0.489424	0.18874	0.912359	1.02191	0.74023	1.10479
genus_Christensenellaceae_R_7group_id.11283	0.799637	0.936844	0.869182	1.19422	0.51076	0.792375	0.70375	0.805926
genus_Clostridium_innocuum_group_id.14397	0.0244258	0.754262	0.418342	1.95879	0.0487838	0.6988	0.224235	0.672279
genus_Clostridium_sensustricto1_id.1873	0.89144	1.02844	0.322963	1.89877	0.682493	1.12482	0.674558	1.20582
genus_Collinsella_id.815	0.67802	1.10114	0.630968	1.77524	0.819121	1.08266	0.417857	0.622129
genus_Coprobacter_id.949	0.58535	1.07931	0.370977	1.64189	0.381431	1.17826	0.415262	1.27899
genus_Coprococcus1_id.11301	0.0309391	1.51008	0.381384	1.54482	0.159219	1.44779	0.157502	1.85159
genus_Coprococcus2_id.11302	0.449112	0.853661	0.549785	3.36235	0.601565	1.16044	0.544808	1.33447
genus_Coprococcus3_id.11303	0.617178	0.888523	0.541495	0.432551	0.942964	0.977577	0.710276	1.20012
genus_Defluviitaleaceae_UCG011_id.11287	0.993075	1.00148	0.647293	0.745779	0.920823	0.978004	0.703532	0.880992
genus_Desulfovibrio_id.3173	0.340417	1.18103	0.18322	0.398078	0.596692	1.15525	0.732487	1.1982
genus_Dialister_id.2183	0.991211	1.00197	0.835907	0.854908	0.850559	0.957417	0.807224	0.912426
genus_Dorea_id.1997	0.249201	0.767756	0.441434	1.71038	0.660114	0.869919	0.867967	0.929245
genus_Eggerthella_id.819	0.648859	0.943882	0.128513	0.370264	0.468674	0.883615	0.319943	0.740795
genus_Eisenbergiella_id.11304	0.126805	0.829449	0.979597	0.97075	0.0467354	0.711321	0.112056	0.62807
genus_Enterorhabdus_id.820	0.45967	0.866419	0.75204	0.841384	0.511051	0.848527	0.615333	0.842154
genus_Erysipelatoclostridium_id.11381	0.180531	0.833854	0.913431	1.06082	0.50355	0.887993	0.911643	0.967199
genus_Escherichia_Shigella_id.3504	0.132892	0.743205	0.765362	0.78124	0.570518	0.846145	0.735531	0.845931
genus_Eubacterium_brachy_group_id.11296	0.780923	0.969719	0.261075	0.584749	0.817272	1.03421	0.702306	1.09697
genus_Eubacterium_coprostanoligenes_group_id.11375	0.99039	1.00246	0.477258	0.535329	0.182577	0.6855	0.279836	0.609497
genus_Eubacterium_eligens_group_id.14372	0.869999	0.957771	0.283934	4.52511	0.37555	0.72239	0.576914	0.729616
genus_Eubacterium_fissicatena_group_id.14373	0.151688	1.18389	0.254314	0.442745	0.214207	1.21968	0.424836	1.20318
genus_Eubacterium_hallii_group_id.11338	0.792098	1.04297	0.266999	1.63527	0.806092	1.0599	0.986604	1.00617
genus_Eubacterium_nodatum_group_id.11297	0.694499	0.962969	0.795483	1.12808	0.74492	1.04426	0.596017	1.15471
genus_Eubacterium_oxidoreducens_group_id.11339	0.641081	1.08576	0.599909	0.681688	0.880849	1.03341	0.954014	0.982235
genus_Eubacterium_rectale_group_id.14374	0.440213	1.20663	0.758221	0.750965	0.715203	1.12223	0.67207	1.2244
genus_Eubacterium_ruminantium_group_id.11340	0.763426	1.04323	0.479136	0.709433	0.903371	1.01992	0.79011	1.06784
genus_Eubacterium_ventriosum_group_id.11341	0.771621	0.951555	0.361397	2.0608	0.383942	0.813223	0.45959	0.751448
genus_Eubacterium_xylanophilum_group_id.14375	0.759244	1.05956	0.451547	1.68971	0.852475	0.954952	0.826299	0.919201
genus_Faecalibacterium_id.2057	0.695258	0.93402	0.443319	0.754099	0.534836	0.868549	0.624388	0.883222
genus_Family_XIII_AD3011_group_id.11293	0.923743	1.02984	0.308176	0.216119	0.534486	1.17813	0.591191	1.24235
genus_Family_XIII_UCG001_id.11294	0.300125	0.80654	0.431384	1.71159	0.660726	0.890292	0.868385	0.932216
genus_Flavonifractor_id.2059	0.256696	1.31931	0.745631	1.41439	0.250421	1.41804	0.399301	1.45769
genus_Fusicatenibacter_id.11305	0.0598084	1.3751	0.631992	0.733972	0.255282	1.3062	0.498699	1.30424
genus_Gordonibacter_id.821	0.790737	0.972398	0.90689	0.946372	0.54551	0.918484	0.693108	0.906429
genus_Haemophilus_id.3698	0.974242	1.0048	0.884157	0.949395	0.818285	0.955809	0.925789	0.975571
genus_Holdemanella_id.11393	0.198218	1.17919	0.0724228	2.11189	0.179515	1.26313	0.188088	1.46196
genus_Holdemania_id.2157	0.517812	1.09272	0.339532	1.49504	0.0746589	1.39325	0.209239	1.43787
genus_Howardella_id.2000	0.489429	1.07433	0.684766	1.24611	0.475666	1.10929	0.622479	1.10625
genus_Hungatella_id.11306	0.0696824	0.75015	0.717795	1.46444	0.393289	0.84039	0.636034	0.873634
genus_Intestinibacter_id.11345	0.851377	0.959514	0.925301	1.07376	0.748067	0.93026	0.820486	1.07778
genus_Intestinimonas_id.2062	0.368093	1.13785	0.264483	0.630329	0.598875	1.1057	0.829295	0.932363
genus_Lachnoclostridium_id.11308	0.614036	1.10291	0.760127	0.813186	0.847486	1.05224	0.906909	0.955616
genus_Lachnospiraceae_FCS020_group_id.11314	0.509283	1.12079	0.722763	0.800123	0.983796	1.00494	0.98681	0.993949
genus_Lachnospiraceae_NC2004_group_id.11316	0.747952	1.04678	0.612834	1.46902	0.685778	1.08331	0.550874	1.23717
genus_Lachnospiraceae_ND3007_group_id.11317	0.0246452	2.47646	0.445184	89115.7	0.049554	2.84027	0.230552	4.51612
genus_Lachnospiraceae_NK4A136_group_id.11319	0.430949	0.886485	0.389	1.37612	0.684775	0.902264	0.795234	0.927922
genus_Lachnospiraceae_UCG001_id.11321	0.978231	1.00408	0.340142	1.85591	0.965414	1.00881	0.365086	0.719327
genus_Lachnospiraceae_UCG004_id.11324	0.780598	0.947712	0.409834	0.501812	0.715716	0.916153	0.808893	0.91107
genus_Lachnospiraceae_UCG008_id.11328	0.229706	1.17666	0.493376	0.581958	0.723579	1.07024	0.90681	0.95986
genus_Lachnospira_id.2004	0.420414	0.850148	0.661421	0.755912	0.333163	0.781487	0.333735	0.679226
genus_Lactobacillus_id.1837	0.79201	0.964348	0.44372	1.4099	0.747069	1.06435	0.589977	1.14038
genus_Lactococcus_id.1851	0.0242968	1.30332	0.805953	0.874068	0.341574	1.16842	0.934334	1.02336
genus_Marvinbryantia_id.2005	0.0371286	0.669271	0.474832	0.513292	0.224824	0.712237	0.893927	1.06213
genus_Methanobrevibacter_id.123	0.0849817	1.27929	0.431661	1.59515	0.0335692	1.46493	0.154054	1.50033
genus_Odoribacter_id.952	0.0144249	0.556796	0.49895	1.72829	0.034143	0.504944	0.153016	0.448452
genus_Olsenella_id.822	0.729618	1.03557	0.7046	1.13601	0.722831	1.04818	0.41701	1.17803
genus_Oscillibacter_id.2063	0.374459	0.884977	0.647745	1.3888	0.58849	0.897053	0.821501	0.923154
genus_Oscillospira_id.2064	0.157995	0.766332	0.0469462	0.13787	0.188509	0.712327	0.415434	0.694892
genus_Oxalobacter_id.2978	0.424628	1.08787	0.995087	1.00314	0.71363	1.05665	0.972108	1.00898
genus_Parabacteroides_id.954	0.825502	0.93656	0.942676	1.1877	0.856275	0.933165	0.775543	0.862195
genus_Paraprevotella_id.962	0.247135	0.872781	0.406771	1.46751	0.347361	0.856207	0.42787	0.807821
genus_Parasutterella_id.2892	0.899895	0.982539	0.815609	1.10098	0.6541	1.09068	0.850413	0.948419
genus_Peptococcus_id.2037	0.977079	0.996791	0.743246	1.15595	0.7487	0.955293	0.834442	0.950831
genus_Phascolarctobacterium_id.2168	0.668451	1.09321	0.349883	2.81439	0.450589	1.22461	0.525153	1.28801
genus_Prevotella7_id.11182	0.830503	1.0216	0.897744	0.926286	0.757031	1.0401	0.929561	1.02001
genus_Prevotella9_id.11183	0.774907	1.03759	0.766594	1.15556	0.993379	0.998319	0.661559	0.868579
genus_Rikenellaceae_RC9_gut_group_id.11191	0.50036	1.11037	0.0869302	0.199328	0.416321	1.13193	0.654761	1.10248
genus_Romboutsia_id.11347	0.495213	0.888536	0.575577	1.33968	0.960256	0.988379	0.769393	1.12095
genus_Roseburia_id.2012	0.782855	1.05585	0.320088	0.466634	0.674759	0.889364	0.931316	0.965457
genus_Ruminiclostridium5_id.11355	0.240667	1.28351	0.584494	1.65539	0.53791	1.19339	0.964674	0.978572
genus_Ruminiclostridium6_id.11356	0.573097	0.908714	0.541456	0.756222	0.389047	0.808703	0.701327	0.8628
genus_Ruminiclostridium9_id.11357	0.659097	1.12673	0.731908	1.56136	0.416088	1.32279	0.527067	1.38967
genus_Ruminococcaceae_NK4A214_group_id.11358	0.954969	1.01022	0.441599	1.75723	0.191664	1.39171	0.217715	1.57771
genus_Ruminococcaceae_UCG002_id.11360	0.438252	0.893795	0.249024	0.625145	0.888045	1.02967	0.432403	1.36133
genus_Ruminococcaceae_UCG003_id.11361	0.31544	0.839252	0.346014	0.5084	0.162304	0.717208	0.228269	0.692059
genus_Ruminococcaceae_UCG004_id.11362	0.945563	1.01085	0.981075	0.978796	0.94202	0.984474	0.935149	1.02917
genus_Ruminococcaceae_UCG005_id.11363	0.464202	1.12626	0.144644	0.486288	0.488042	1.19169	0.743646	0.882592
genus_Ruminococcaceae_UCG009_id.11366	0.764836	0.961305	0.79892	0.87114	0.609612	0.916321	0.783376	0.931926
genus_Ruminococcaceae_UCG010_id.11367	0.426814	0.833733	0.345195	0.388531	0.218648	0.669901	0.213301	0.593366
genus_Ruminococcaceae_UCG011_id.11368	0.788837	0.954677	0.139082	3.61193	0.351228	0.863932	0.355979	0.839405
genus_Ruminococcaceae_UCG013_id.11370	0.900264	0.975595	0.28835	1.89464	0.77694	1.0793	0.680283	1.1639
genus_Ruminococcaceae_UCG014_id.11371	0.979556	0.99556	0.38662	0.68827	0.625638	0.893954	0.716161	0.90628
genus_Ruminococcus1_id.11373	0.638673	0.911654	0.204932	0.461962	0.452362	0.805328	0.382346	0.641068
genus_Ruminococcus2_id.11374	0.785176	0.959622	0.367407	0.711262	0.271129	0.804177	0.289493	0.733109
genus_Ruminococcus_gauvreauii_group_id.11342	0.67597	1.07929	0.833976	0.809576	0.963995	0.988282	0.773041	0.886507
genus_Ruminococcus_gnavus_group_id.14376	0.08249	0.799717	0.300587	2.12282	0.128172	0.763406	0.257115	0.735007
genus_Ruminococcus_torques_group_id.14377	0.681722	0.889738	0.951403	0.946123	0.411484	0.748056	0.444388	0.679317
genus_Sellimonas_id.14369	0.815774	1.02305	0.117439	2.91726	0.635147	0.934584	0.559197	0.866888
genus_Senegalimassilia_id.11160	0.914198	0.976781	0.486131	2.61733	0.60619	1.17407	0.485483	1.39796
genus_Slackia_id.825	0.527197	1.12069	0.783988	1.40994	0.877014	1.03447	0.974149	1.00991
genus_Streptococcus_id.1853	0.382824	0.838529	0.660753	0.670356	0.90833	1.03444	0.677581	1.25022
genus_Subdoligranulum_id.2070	0.533269	0.881556	0.648477	1.27723	0.626861	1.13601	0.601439	1.20797
genus_Sutterella_id.2896	0.777931	0.9511	0.430635	1.92665	0.721927	1.09572	0.682692	1.17569
genus_Terrisporobacter_id.11348	0.611606	0.900911	0.145275	0.297562	0.848077	0.946251	0.872496	0.931269
genus_Turicibacter_id.2162	0.759239	0.950138	0.835943	0.864476	0.9035	1.02924	0.73573	1.14306
genus_Tyzzerella3_id.11335	0.423518	0.915182	0.915641	0.933487	0.564863	0.915236	0.198821	0.687111
genus_Veillonella_id.2198	0.439776	1.18077	0.189837	14.7404	0.328552	1.30426	0.473892	1.48627
genus_Victivallis_id.2256	0.394197	1.09157	0.0484095	6.20755	0.457278	1.11544	0.912896	1.02788
order_Actinomycetales_id.420	0.54575	1.14026	0.676107	0.794555	0.857552	1.05061	0.922923	1.02982
order_Bacillales_id.1674	0.945268	0.992634	0.591835	0.781803	0.888214	0.981059	0.867533	0.967146
order_Bacteroidales_id.913	0.117986	0.656061	0.23908	1.96905	0.611417	0.866657	0.698334	0.861412
order_Bifidobacteriales_id.432	0.641033	1.08404	0.579831	1.38224	0.846763	0.954453	0.54331	0.830128
order_Burkholderiales_id.2874	0.14067	0.729381	0.812307	0.846103	0.415202	0.793348	0.741729	0.871407
order_Clostridiales_id.1863	0.982509	0.995892	0.879316	1.08279	0.732906	0.919736	0.790707	0.910119
order_Coriobacteriales_id.810	0.391711	0.844362	0.23255	0.346839	0.48243	0.83534	0.5687	0.775306
order_Desulfovibrionales_id.3156	0.59557	1.12043	0.418242	2.55492	0.342314	1.3043	0.722632	1.17457
order_Enterobacteriales_id.3468	0.455444	1.20241	0.685343	1.88471	0.991132	0.996311	0.898278	0.938492
order_Erysipelotrichales_id.2148	0.0879026	0.703769	0.881978	1.145	0.118314	0.664485	0.230946	0.581521
order_Gastranaerophilales_id.1591	0.936081	0.988941	0.685406	0.789242	0.963773	1.00909	0.778403	1.09402
order_Lactobacillales_id.1800	0.980691	0.995715	0.63191	0.798796	0.861517	0.958648	0.985763	0.993358
order_Methanobacteriales_id.120	0.114499	1.19718	0.768529	0.871702	0.196157	1.20591	0.269712	1.28681
order_Mollicutes_RF9_id.11579	0.958388	0.991897	0.422349	1.58094	0.408284	1.19992	0.411197	1.32378
order_NB1n_id.3953	0.108587	0.838352	0.877675	1.0879	0.663675	0.935616	0.814719	0.95114
order_Pasteurellales_id.3688	0.237915	1.15921	0.673602	0.886904	0.810994	1.04241	0.950224	1.01362
order_Rhodospirillales_id.2667	0.245556	1.15975	0.237109	0.525154	0.549707	1.11635	0.506758	0.804467
order_Selenomonadales_id.2165	0.270784	1.44158	0.196025	4.80621	0.408606	1.30883	0.975903	1.01722
order_Verrucomicrobiales_id.4030	0.00602534	1.60176	0.793562	1.16748	0.0726669	1.54379	0.259281	1.45768
order_Victivallales_id.2254	0.695366	0.950021	0.942741	1.03543	0.273893	0.835538	0.375032	0.762609
phylum_Actinobacteria_id.400	0.42169	0.86114	0.972021	0.972641	0.336937	0.777731	0.275563	0.658668
phylum_Bacteroidetes_id.905	0.250435	0.77554	0.782665	1.21333	0.605896	0.852885	0.549447	0.778202
phylum_Cyanobacteria_id.1500	0.828151	0.96626	0.674261	0.758217	0.88274	1.03095	0.958529	1.01715
phylum_Euryarchaeota_id.55	0.745269	1.03309	0.819876	0.901185	0.792214	1.03535	0.941503	1.01754
phylum_Firmicutes_id.1672	0.11069	1.30849	0.686071	0.849629	0.520515	1.15058	0.789382	1.08126
phylum_Lentisphaerae_id.2238	0.832321	0.974368	0.849322	1.09628	0.580806	0.910972	0.373382	0.770074
phylum_Proteobacteria_id.2375	0.360723	0.835487	0.399357	0.616833	0.372524	0.802619	0.598301	0.832349
phylum_Tenericutes_id.3919	0.374395	1.15567	0.918605	0.943699	0.783435	1.062	0.835613	1.07069
phylum_Verrucomicrobia_id.3982	0.33395	1.17041	0.742987	0.865332	0.885104	1.03151	0.9911	1.00351
