# Supplementary material for: Investigating the Causal Relationship of Gut Microbiota with Psoriasis and Psoriatic Arthritis: A Bidirectional Two-Sample Mendelian Randomization Study.
Source: Preprints.org preprint supplement (doi:10.20944/preprints202306.1726.v1), 2023-06-25
Supplement: Supplementary file 7 [file Supplementary Table 5_PsA_SNPs.xlsx]

## Sheet: Supplementary Table 5_PsA_SNPs
	SNP	b	se	p
class	rs11655079	0.0858458	0.197557	0.663898
class	rs11745923	0.0385087	0.189336	0.838832
class	rs12049045	0.148619	0.187174	0.427186
class	rs134366	0.136498	0.195457	0.484958
class	rs1376754	0.10028	0.199358	0.614954
class	rs1515761	0.047697	0.182134	0.793415
class	rs182549	0.193017	0.215996	0.371527
class	rs4945008	0.0426716	0.189533	0.82187
class	rs6660520	0.0869814	0.202469	0.667484
class	rs72767435	0.15208	0.190957	0.425796
class	rs7322849	0.0284528	0.18404	0.877136
class	rs80083040	0.0297188	0.191931	0.876947
class	rs857444	0.124244	0.19557	0.525237
class	rs961091	0.138806	0.190563	0.466369
class	rs140912403	0.0792145	0.207933	0.703232
class	rs34569731	0.0693853	0.204186	0.733996
class	rs55876211	0.0211833	0.205605	0.91794
class	rs62285697	0.0166844	0.205009	0.935137
class	rs76784716	0.113298	0.213125	0.595002
class	rs7960664	-0.0317615	0.199025	0.873207
class	rs9813022	-0.0711858	0.206648	0.730486
class	rs11110282	-0.0736368	0.16319	0.651821
class	rs11730038	-0.101263	0.165538	0.540721
class	rs12797734	-0.0695445	0.164114	0.671742
class	rs13068444	-0.0658826	0.163545	0.687066
class	rs1595463	-0.111281	0.16377	0.496823
class	rs28564647	-0.0167713	0.163536	0.918317
class	rs2952251	-0.105556	0.163581	0.518744
class	rs34989881	-0.0369614	0.16375	0.82142
class	rs35344081	-0.127961	0.165067	0.438219
class	rs4028634	-0.0285781	0.164265	0.861885
class	rs4459992	-0.0671079	0.164262	0.682875
class	rs57872228	-0.0340761	0.163568	0.834971
class	rs694949	-0.0455538	0.163876	0.78103
class	rs74663707	-0.0442829	0.163922	0.787048
class	rs7666190	-0.0851051	0.167624	0.611654
class	rs77558518	-0.0791195	0.166764	0.635185
class	rs78938557	-0.084162	0.162227	0.603907
class	rs9581006	-0.0614479	0.17302	0.722478
class	rs11146701	-0.391562	0.283855	0.167757
class	rs17343978	-0.27856	0.23326	0.232397
class	rs2032750	-0.426628	0.293429	0.145963
class	rs4146051	-0.482913	0.291682	0.0978001
class	rs4916508	-0.298611	0.253224	0.238304
class	rs55773148	-0.438823	0.295211	0.137154
class	rs62531359	-0.422071	0.293336	0.150188
class	rs62575403	-0.467349	0.292937	0.110625
class	rs72706335	-0.621829	0.263122	0.0181142
class	rs73975615	-0.356038	0.26964	0.186695
class	rs7631304	-0.426862	0.291286	0.142801
class	rs79585701	-0.447835	0.289277	0.121594
class	rs929878	-0.446357	0.289318	0.122881
class	rs11128180	-0.074432	0.279714	0.790162
class	rs1511453	-0.0099197	0.243023	0.967441
class	rs1928341	-0.147371	0.280907	0.599844
class	rs2321387	-0.151378	0.278159	0.586294
class	rs2613606	0.00917515	0.246868	0.970353
class	rs320161	-0.257496	0.226898	0.256437
class	rs4033856	-0.18329	0.266443	0.491505
class	rs6087811	-0.0927296	0.288106	0.74756
class	rs62395635	-0.0666404	0.280007	0.811885
class	rs75242906	-0.139842	0.293737	0.634019
class	rs10774377	0.0277721	0.199604	0.889343
class	rs112334273	0.00402797	0.201326	0.984038
class	rs13105690	-0.0300995	0.198152	0.879265
class	rs13179700	0.0184951	0.198447	0.925745
class	rs1842454	0.0358275	0.196829	0.855564
class	rs2273429	-0.0386636	0.197296	0.844635
class	rs6797343	0.0090342	0.197932	0.963595
class	rs6814436	-0.0108342	0.199385	0.956666
class	rs6815608	0.015518	0.208892	0.940782
class	rs72738886	-0.0267032	0.197718	0.892567
class	rs72915163	-0.0790465	0.198157	0.68996
class	rs992074	0.00276645	0.209801	0.989479
class	rs11250875	-0.211574	0.205486	0.303185
class	rs11656361	-0.134447	0.209053	0.520143
class	rs12974142	-0.217993	0.202624	0.281993
class	rs13307134	-0.228184	0.203092	0.261205
class	rs1397793	-0.133388	0.203995	0.513192
class	rs1816223	-0.216558	0.204494	0.289603
class	rs240104	-0.197611	0.206862	0.339437
class	rs2442778	-0.192657	0.205986	0.349639
class	rs3025411	-0.0538212	0.207798	0.79563
class	rs34739816	-0.134095	0.203893	0.510748
class	rs67561917	-0.175541	0.207287	0.397077
class	rs719099	-0.148635	0.204312	0.466925
class	rs8010111	-0.149215	0.20801	0.473162
class	rs1035691	0.0276984	0.253935	0.913141
class	rs11599763	0.141211	0.266068	0.595604
class	rs17084793	0.230634	0.226846	0.309296
class	rs17791387	0.0925112	0.262872	0.724895
class	rs2838334	0.0262656	0.253171	0.917371
class	rs3935584	0.25373	0.215469	0.238968
class	rs4506934	0.0487062	0.266237	0.854843
class	rs55744759	0.0908226	0.265675	0.732459
class	rs6058181	0.158605	0.268657	0.554948
class	rs62020470	0.0358981	0.24723	0.884552
class	rs9928243	0.09288	0.268151	0.729063
class	rs1074800	-0.317812	0.214384	0.138224
class	rs10781552	-0.375781	0.214755	0.0801513
class	rs17530232	-0.445177	0.213498	0.037055
class	rs1884466	-0.333347	0.213909	0.119149
class	rs2300774	-0.373551	0.215775	0.0834149
class	rs290833	-0.376915	0.214723	0.0791984
class	rs35161940	-0.320916	0.214801	0.135172
class	rs4078432	-0.355824	0.213387	0.0954147
class	rs56970041	-0.317902	0.210092	0.130241
class	rs62504403	-0.344629	0.216538	0.111488
class	rs7234058	-0.31447	0.216746	0.146817
class	rs7826267	-0.38516	0.211837	0.069035
class	rs8003149	-0.304341	0.215227	0.157349
class	rs11181912	0.2082	0.311585	0.504008
class	rs12404135	0.301745	0.29891	0.312742
class	rs6706173	0.306085	0.30802	0.32036
class	rs75101789	0.321316	0.297893	0.280753
class	rs79795896	0.113682	0.331589	0.731719
class	rs9494710	0.302047	0.308052	0.326836
class	rs1002941	-0.0787329	0.138772	0.570473
class	rs11770843	0.000758515	0.141184	0.995713
class	rs17114848	-0.0127371	0.138775	0.926871
class	rs2031282	-0.0418014	0.139083	0.763758
class	rs2825714	-0.106281	0.141228	0.45172
class	rs62570196	-0.0314005	0.137994	0.819996
class	rs72640280	-0.124788	0.140941	0.375944
class	rs77599476	-0.0161823	0.141969	0.90925
class	rs10148250	0.0478547	0.169233	0.77735
class	rs10738747	0.0885616	0.175983	0.614795
class	rs11150282	-0.0269777	0.14103	0.848298
class	rs113884518	0.154877	0.143021	0.278852
class	rs28678345	0.068592	0.177063	0.698469
class	rs367480	0.10904	0.174487	0.532024
class	rs4129395	0.0988656	0.177794	0.578165
class	rs789069	0.0892693	0.174325	0.608591
class	rs79790072	0.0786368	0.174862	0.652921
class	rs9864379	0.200471	0.159847	0.209792
class	rs10202904	0.136916	0.123294	0.266787
class	rs10424197	0.181109	0.119791	0.130567
class	rs4257531	0.20776	0.120335	0.084256
class	rs6508769	0.179903	0.121564	0.138898
class	rs6776814	0.183471	0.115908	0.113445
class	rs73068003	0.160285	0.119437	0.179593
class	rs73457410	0.155634	0.121103	0.198744
class	rs75208022	0.24292	0.125865	0.053606
class	rs894996	0.174637	0.121946	0.15212
class	rs10108398	0.141187	0.171509	0.410394
class	rs11890098	0.137944	0.170965	0.419749
class	rs12566890	0.0894515	0.171133	0.601183
class	rs17214486	0.163071	0.168589	0.333409
class	rs2464826	0.191489	0.169201	0.257752
class	rs28537087	0.024799	0.172007	0.885363
class	rs3768491	0.150312	0.169747	0.375884
class	rs4885016	0.17731	0.16835	0.29224
class	rs6043847	0.179866	0.168017	0.284382
class	rs72901605	0.145795	0.167957	0.385366
class	rs74603314	0.172117	0.177225	0.331459
class	rs78169027	0.158686	0.167465	0.343343
class	rs1135612	0.456985	0.340122	0.179081
class	rs13086907	0.27017	0.350618	0.440972
class	rs1643968	0.438426	0.359096	0.222118
class	rs1649999	0.206703	0.300694	0.491818
class	rs2834062	0.254366	0.332804	0.444683
class	rs4463806	0.344066	0.358218	0.336808
class	rs4722181	0.519553	0.322159	0.106805
class	rs60274479	0.435587	0.357671	0.223284
class	rs61249479	0.369667	0.368016	0.315145
class	rs71405394	0.264229	0.356009	0.457967
class	rs73232831	0.378327	0.367354	0.30307
class	rs9423647	0.452246	0.347815	0.193515
class	rs111862613	0.463766	0.181325	0.0105382
class	rs117107102	0.487931	0.188965	0.00981948
class	rs11729256	0.406845	0.178163	0.0223978
class	rs12908520	0.494762	0.179426	0.005825
class	rs2602429	0.464237	0.180625	0.010165
class	rs4242783	0.541352	0.17956	0.00257079
class	rs4936098	0.471653	0.17963	0.00864733
class	rs61779207	0.524914	0.179884	0.00352208
class	rs74542928	0.515981	0.176291	0.00342394
class	rs9349825	0.416729	0.177829	0.0191079
class	rs941682	0.39713	0.178158	0.0258081
family	rs262812	-0.420899	0.211222	0.0462958
family	rs2933324	-0.252577	0.26928	0.348259
family	rs45497800	-0.142246	0.260142	0.584516
family	rs6589457	-0.235023	0.27803	0.397934
family	rs6923842	-0.330463	0.251422	0.188719
family	rs74540770	-0.341411	0.255355	0.181221
family	rs78702810	-0.141639	0.269438	0.599109
family	rs2889192	0.155451	0.249446	0.533162
family	rs34583783	0.200903	0.232365	0.387259
family	rs35011108	0.211402	0.33327	0.525868
family	rs4073240	-0.0186943	0.241909	0.938402
family	rs112135816	0.184426	0.220915	0.403812
family	rs1153990	0.13183	0.227888	0.562937
family	rs147968	0.12454	0.225366	0.580528
family	rs28480294	0.166958	0.225486	0.459035
family	rs4033856	0.151397	0.224152	0.499409
family	rs62191117	0.317121	0.228319	0.164851
family	rs62395635	0.273982	0.227198	0.22785
family	rs6969323	0.225125	0.225472	0.318054
family	rs74776516	0.127058	0.224511	0.57144
family	rs7638039	0.270459	0.226718	0.232896
family	rs9537886	0.179476	0.229069	0.433334
family	rs11585893	0.112742	0.288867	0.696322
family	rs13207588	-0.0801816	0.273013	0.768994
family	rs1340391	0.107048	0.269109	0.690787
family	rs17619981	-0.0675037	0.28563	0.813175
family	rs2023437	0.119883	0.276987	0.665152
family	rs66710942	0.112999	0.274864	0.680992
family	rs6795673	0.0149449	0.279165	0.957306
family	rs10872669	-0.0945669	0.271721	0.727818
family	rs12748533	-0.126102	0.274496	0.645951
family	rs17043785	-0.0649751	0.286034	0.8203
family	rs1850003	-0.0401813	0.255658	0.875113
family	rs61508842	-0.180556	0.25886	0.485486
family	rs738193	-0.201876	0.260776	0.438852
family	rs78609301	0.0429486	0.208908	0.837114
family	rs941000	-0.259009	0.228277	0.256531
family	rs10831953	0.0994806	0.178213	0.576699
family	rs12446429	0.0448961	0.181554	0.804686
family	rs13020688	0.0753144	0.179158	0.674208
family	rs182549	0.202782	0.207816	0.329175
family	rs4957061	0.10405	0.179716	0.56261
family	rs540489	0.0643744	0.177962	0.717554
family	rs55888705	0.0348658	0.178009	0.844716
family	rs6899771	0.0533561	0.179556	0.766348
family	rs7174549	0.131985	0.179034	0.460996
family	rs7322849	-0.0115826	0.181787	0.949197
family	rs857444	0.116437	0.179153	0.515737
family	rs10875374	-0.108443	0.205763	0.598174
family	rs12186080	-0.0225612	0.206427	0.91297
family	rs12341505	-0.123532	0.203668	0.544159
family	rs2795528	-0.21854	0.220873	0.322449
family	rs2817172	-0.0386144	0.206293	0.851518
family	rs4723021	-0.169522	0.205721	0.409918
family	rs550843	-0.0405784	0.210695	0.847278
family	rs56188186	-0.072158	0.201866	0.720751
family	rs62397761	-0.15921	0.207247	0.442362
family	rs881532	-0.157561	0.205681	0.443651
family	rs10517600	-0.159999	0.142561	0.261728
family	rs10904722	-0.128552	0.14994	0.39125
family	rs118104867	-0.0335334	0.151416	0.82473
family	rs13409132	-0.118573	0.151187	0.432877
family	rs17121075	-0.0982848	0.149653	0.511341
family	rs2191834	-0.135061	0.150187	0.368502
family	rs28691777	-0.184235	0.140808	0.190735
family	rs34088226	-0.12873	0.149497	0.389188
family	rs55682560	-0.051616	0.142792	0.717743
family	rs6588624	-0.0755361	0.144559	0.601304
family	rs66714985	-0.164594	0.144857	0.255852
family	rs7226487	-0.114633	0.151489	0.449224
family	rs7538034	-0.0924295	0.147277	0.530272
family	rs7725895	-0.147899	0.150642	0.326202
family	rs989682	-0.123437	0.150616	0.412474
family	rs11250875	-0.211574	0.205486	0.303185
family	rs11656361	-0.134447	0.209053	0.520143
family	rs12974142	-0.217993	0.202624	0.281993
family	rs13307134	-0.228184	0.203092	0.261205
family	rs1397793	-0.133388	0.203995	0.513192
family	rs1816223	-0.216558	0.204494	0.289603
family	rs240104	-0.197611	0.206862	0.339437
family	rs2442778	-0.192657	0.205986	0.349639
family	rs3025411	-0.0538212	0.207798	0.79563
family	rs34739816	-0.134095	0.203893	0.510748
family	rs67561917	-0.175541	0.207287	0.397077
family	rs719099	-0.148635	0.204312	0.466925
family	rs8010111	-0.149215	0.20801	0.473162
family	rs112893842	-0.0125331	0.157903	0.936737
family	rs1582238	-0.0121604	0.160945	0.939772
family	rs17051335	-0.0702656	0.162051	0.664578
family	rs1908593	-0.0459433	0.1591	0.772758
family	rs4344384	-0.047059	0.159457	0.767902
family	rs4677103	-0.0765296	0.160249	0.632959
family	rs540220	0.000347969	0.159477	0.998259
family	rs55658617	-0.0652516	0.158395	0.680372
family	rs72731813	-0.00420713	0.158107	0.978771
family	rs9608282	-0.00826673	0.155615	0.957634
family	rs9725395	-0.0296148	0.163889	0.856602
family	rs11599763	0.107323	0.274462	0.695774
family	rs17791387	0.0429879	0.268212	0.872664
family	rs2838334	-0.0514778	0.251536	0.837842
family	rs3935584	0.258842	0.250146	0.30078
family	rs4506934	-0.0222545	0.267817	0.933775
family	rs6058181	0.129253	0.277258	0.641085
family	rs72647048	0.0397604	0.271871	0.883726
family	rs9928243	0.0405942	0.276126	0.883122
family	rs11026530	0.220602	0.269744	0.41346
family	rs2374342	0.239184	0.26889	0.373722
family	rs35673018	0.234949	0.264225	0.373895
family	rs504442	0.264913	0.264074	0.315775
family	rs62210023	0.212597	0.269274	0.429808
family	rs78143293	0.0775776	0.267364	0.771696
family	rs79757635	0.0426017	0.26394	0.871773
family	rs1074800	-0.317812	0.214384	0.138224
family	rs10781552	-0.375781	0.214755	0.0801513
family	rs17530232	-0.445177	0.213498	0.037055
family	rs1884466	-0.333347	0.213909	0.119149
family	rs2300774	-0.373551	0.215775	0.0834149
family	rs290833	-0.376915	0.214723	0.0791984
family	rs35161940	-0.320916	0.214801	0.135172
family	rs4078432	-0.355824	0.213387	0.0954147
family	rs56970041	-0.317902	0.210092	0.130241
family	rs62504403	-0.344629	0.216538	0.111488
family	rs7234058	-0.31447	0.216746	0.146817
family	rs7826267	-0.38516	0.211837	0.069035
family	rs8003149	-0.304341	0.215227	0.157349
family	rs10759623	-0.0222401	0.115041	0.846706
family	rs11547158	-0.0405254	0.112909	0.719654
family	rs17379710	-0.123455	0.112111	0.270814
family	rs2155352	-0.0376504	0.113831	0.740827
family	rs2156611	-0.0861628	0.111825	0.440996
family	rs3733511	-0.0503775	0.112412	0.654043
family	rs488164	-0.100804	0.111883	0.367598
family	rs697771	-0.0292459	0.112398	0.79471
family	rs10404377	-0.0266178	0.289844	0.926829
family	rs118170811	-0.0893885	0.293479	0.760684
family	rs482905	0.130332	0.292517	0.65592
family	rs6501525	-0.0315221	0.293893	0.914585
family	rs66753613	-0.10108	0.29096	0.72829
family	rs6797051	-0.0924412	0.288348	0.748522
family	rs7514702	0.0240495	0.288428	0.933549
family	rs10402491	0.075342	0.194217	0.698071
family	rs11139361	-0.00461265	0.193341	0.980966
family	rs112040820	0.094117	0.193813	0.627246
family	rs11841382	0.00669124	0.191758	0.972164
family	rs11979110	0.0733929	0.19437	0.705732
family	rs1205443	0.138015	0.19368	0.476098
family	rs12760724	0.0312946	0.193132	0.871277
family	rs13005175	-0.0208218	0.192055	0.913666
family	rs2159863	0.0177045	0.192999	0.92691
family	rs2910921	0.044413	0.19583	0.820584
family	rs3127230	0.101583	0.193311	0.599243
family	rs35524804	0.107549	0.194276	0.57986
family	rs7359994	0.0905637	0.194197	0.640965
family	rs79086868	0.0211715	0.193466	0.912859
family	rs959845	0.0162396	0.193756	0.933204
family	rs9929145	0.0645303	0.195887	0.741834
family	rs1530559	0.20532	0.149812	0.170527
family	rs16861661	0.143241	0.154337	0.353353
family	rs62314653	0.157889	0.15116	0.296248
family	rs74599091	0.138798	0.145828	0.341202
family	rs768253	0.157027	0.150304	0.296148
family	rs77478751	0.254626	0.17231	0.139482
family	rs921925	0.182237	0.150964	0.227372
family	rs9345899	0.200499	0.149716	0.180508
family	rs10202904	0.136916	0.123294	0.266787
family	rs10424197	0.181109	0.119791	0.130567
family	rs4257531	0.20776	0.120335	0.084256
family	rs6508769	0.179903	0.121564	0.138898
family	rs6776814	0.183471	0.115908	0.113445
family	rs73068003	0.160285	0.119437	0.179593
family	rs73457410	0.155634	0.121103	0.198744
family	rs75208022	0.24292	0.125865	0.053606
family	rs894996	0.174637	0.121946	0.15212
family	rs111966731	0.101852	0.105061	0.332314
family	rs11246212	0.0155945	0.103198	0.879887
family	rs12002250	0.0474173	0.102079	0.642277
family	rs1569853	0.0642725	0.102968	0.532496
family	rs17138946	0.0742559	0.10326	0.472069
family	rs36057338	0.0575779	0.101284	0.569709
family	rs4428215	0.0731621	0.10455	0.484065
family	rs561239	0.0826889	0.10253	0.419964
family	rs6000536	0.0527851	0.102751	0.607448
family	rs62435498	0.0539857	0.104567	0.605661
family	rs736744	0.00815257	0.104109	0.937583
family	rs7993559	0.0833407	0.102911	0.418036
family	rs80330081	0.0399188	0.105071	0.704002
family	rs934049	0.0731663	0.102797	0.476617
family	rs10965428	0.184205	0.127586	0.148806
family	rs111582866	0.159397	0.13884	0.250945
family	rs12050685	0.143415	0.139223	0.302956
family	rs16970009	0.101465	0.127397	0.425772
family	rs4822728	0.111305	0.132598	0.401233
family	rs6972479	0.181315	0.131816	0.168971
family	rs72756943	0.17197	0.137082	0.209658
family	rs73139353	0.16079	0.151193	0.287566
family	rs76022354	0.188655	0.142718	0.186211
family	rs78909003	0.175043	0.14577	0.229824
family	rs9382510	0.118885	0.137873	0.388534
family	rs9895850	0.129763	0.139084	0.350826
family	rs9938097	0.101554	0.129	0.431143
family	rs117452796	-0.0612926	0.189741	0.746671
family	rs12144792	-0.0186606	0.179261	0.917092
family	rs12634826	0.0190284	0.181739	0.916612
family	rs12992764	-0.00983568	0.180674	0.956585
family	rs150600492	-0.0513412	0.179422	0.774765
family	rs35703006	0.0649574	0.181571	0.720529
family	rs4990837	0.0453748	0.182188	0.803318
family	rs75430375	-0.0624234	0.17908	0.727405
family	rs75898026	0.0899761	0.180551	0.618244
family	rs10805326	-0.271895	0.165983	0.101403
family	rs117020988	-0.14814	0.180334	0.411374
family	rs12377846	-0.259708	0.174753	0.13724
family	rs12986312	-0.271335	0.166169	0.102494
family	rs1467258	-0.361649	0.166905	0.0302506
family	rs1520207	-0.346666	0.166184	0.0369748
family	rs4692811	-0.301313	0.167847	0.0726274
family	rs59865771	-0.280764	0.166524	0.0917913
family	rs61841503	-0.334338	0.168127	0.0467455
family	rs6721459	-0.327126	0.16574	0.048412
family	rs76982728	-0.275498	0.163618	0.0922221
family	rs77540684	-0.323275	0.168348	0.0548232
family	rs9573937	-0.299748	0.165989	0.0709444
family	rs10762312	0.00839816	0.283098	0.976334
family	rs10858364	0.208333	0.274871	0.448493
family	rs17065783	0.0420744	0.287771	0.883757
family	rs1980561	0.00850039	0.283054	0.976042
family	rs35233670	0.132409	0.298417	0.657256
family	rs35961441	0.0765921	0.289133	0.791084
family	rs6953849	0.156582	0.303103	0.605438
family	rs7330827	0.0145014	0.28636	0.959612
family	rs864093	0.27562	0.269381	0.306232
family	rs12118202	-0.063524	0.185862	0.732516
family	rs13069367	-0.136537	0.19139	0.475599
family	rs148376875	-0.168183	0.187893	0.370734
family	rs2206482	-0.108605	0.193089	0.573801
family	rs2278540	-0.104466	0.192187	0.586741
family	rs34660375	-0.194841	0.175353	0.266509
family	rs3758087	-0.102338	0.191303	0.592682
family	rs3860225	-0.0938589	0.18945	0.620298
family	rs4493272	-0.1029	0.193996	0.595819
family	rs4685827	-0.19126	0.177957	0.282485
family	rs7252711	-0.103797	0.190395	0.58564
family	rs7975087	-0.0583926	0.174853	0.738416
family	rs912860	-0.150729	0.194788	0.439043
family	rs9586501	-0.0259117	0.170284	0.879055
family	rs9958960	-0.1573	0.192707	0.414348
family	rs1035406	0.0668487	0.141972	0.637742
family	rs11591293	0.133765	0.140521	0.341137
family	rs13336560	0.0320853	0.12805	0.802148
family	rs1549633	0.0930506	0.144659	0.520067
family	rs1923415	0.117112	0.141229	0.406971
family	rs3754624	0.0719669	0.143492	0.615992
family	rs4278423	0.0955695	0.143446	0.505258
family	rs55876211	0.101037	0.146809	0.491313
family	rs61933850	0.176608	0.142003	0.213612
family	rs6679026	0.12064	0.142549	0.397383
family	rs7001029	0.0783214	0.143413	0.584981
family	rs72714493	0.138756	0.132563	0.295232
family	rs74354280	0.0432462	0.137375	0.75291
family	rs76784716	0.137401	0.143115	0.337019
family	rs9813022	0.0605947	0.142658	0.671015
family	rs10217435	-0.270268	0.17928	0.131679
family	rs10832801	-0.321931	0.176036	0.0674324
family	rs1939881	-0.334311	0.176353	0.058001
family	rs2447496	-0.425806	0.176127	0.0156232
family	rs2833282	-0.400591	0.176682	0.0233719
family	rs36021379	-0.371214	0.178607	0.0376738
family	rs4264350	-0.342473	0.178659	0.0552488
family	rs59663348	-0.418606	0.176324	0.0175928
family	rs62532512	-0.381244	0.178064	0.0322703
family	rs6744030	-0.412725	0.178066	0.0204591
family	rs6837275	-0.419289	0.176912	0.017786
family	rs74474130	-0.343491	0.178205	0.0539171
family	rs77885767	-0.27629	0.180563	0.125978
family	rs9389714	-0.354296	0.17638	0.0445678
family	rs9578457	-0.374752	0.181656	0.0391148
family	rs9603208	-0.345157	0.178183	0.0527343
family	rs10093275	-0.0584612	0.215603	0.786274
family	rs10166469	-0.0547135	0.214231	0.798418
family	rs1612733	-0.0403813	0.215132	0.851108
family	rs17376049	-0.119886	0.216735	0.580164
family	rs2113833	0.0216531	0.220218	0.921674
family	rs3009418	-0.0284642	0.211808	0.893097
family	rs55793120	0.130163	0.222837	0.559141
family	rs56199908	-0.0678107	0.240288	0.777786
family	rs76724913	-0.0177599	0.216753	0.934697
family	rs10028567	0.197162	0.224872	0.38061
family	rs11110281	0.0402043	0.222454	0.856579
family	rs16950051	0.0445618	0.220876	0.840112
family	rs2370083	0.0212006	0.216449	0.921974
family	rs2952251	-0.0216088	0.219371	0.921532
family	rs35344081	-0.0530053	0.221309	0.810712
family	rs57646748	0.0490665	0.214351	0.818941
family	rs6806351	-0.00628909	0.220142	0.977209
family	rs77968078	0.082481	0.218699	0.706067
family	rs7916711	-0.0299067	0.227914	0.895602
family	rs957755	0.111696	0.217598	0.607732
family	rs111810795	0.0568113	0.140134	0.685178
family	rs114889439	0.0229483	0.146925	0.875883
family	rs11700976	0.0438689	0.139994	0.754004
family	rs12186441	-0.00116519	0.144984	0.993588
family	rs12668619	0.0383799	0.140172	0.784235
family	rs12741784	0.0155498	0.140451	0.911843
family	rs1442060	0.0508514	0.140063	0.71656
family	rs1693340	0.0353879	0.139225	0.799358
family	rs2175069	0.0400257	0.140077	0.775077
family	rs2561116	0.0306367	0.138956	0.825499
family	rs2585520	0.0359691	0.138608	0.795248
family	rs4263802	0.0290826	0.13975	0.835148
family	rs4461038	0.0826828	0.140033	0.554886
family	rs4797169	0.0200326	0.139959	0.886186
family	rs61264131	0.0299715	0.154668	0.846348
family	rs6692542	0.0986631	0.140053	0.481142
family	rs6909981	0.0209397	0.139175	0.880405
family	rs79535861	0.049155	0.140887	0.727167
family	rs9345168	0.0414509	0.14004	0.767236
family	rs111862613	0.464028	0.181376	0.0105164
family	rs117107102	0.488225	0.189021	0.0097969
family	rs11729256	0.407064	0.17821	0.0223608
family	rs12908520	0.495052	0.179479	0.00581066
family	rs2602429	0.464417	0.180639	0.0101416
family	rs4242783	0.541403	0.179575	0.00257057
family	rs4936098	0.471899	0.179674	0.0086288
family	rs61779207	0.525274	0.179944	0.00351047
family	rs74542928	0.516224	0.176333	0.0034164
family	rs9349825	0.41694	0.177882	0.0190826
family	rs941682	0.397337	0.178207	0.0257715
family	rs11671100	-0.0748053	0.101165	0.459642
family	rs11764871	-0.0352992	0.0982811	0.719471
family	rs2944282	-0.0644879	0.100434	0.520812
family	rs34962571	-0.0690929	0.10023	0.490607
family	rs4396289	-0.100976	0.0971411	0.298582
family	rs61702987	-0.0632775	0.0989147	0.522356
family	rs62570196	-0.051287	0.0987079	0.603353
family	rs6545794	-0.0727454	0.101468	0.473418
family	rs67832247	0.0149294	0.0980477	0.878977
family	rs7077363	-0.0828376	0.0977138	0.396573
family	rs7314815	-0.05463	0.0992947	0.582196
family	rs7627405	-0.0803816	0.0976505	0.410419
genus1	rs2715439	0.0527896	0.178262	0.767127
genus1	rs34583783	0.0737579	0.174077	0.671778
genus1	rs35011108	0.0321891	0.198498	0.871177
genus1	rs4073240	-0.0516881	0.177698	0.771146
genus1	rs4146653	0.0244034	0.176377	0.889956
genus1	rs71315246	0.101394	0.17577	0.564037
genus1	rs7915461	0.0497602	0.186066	0.789136
genus1	rs11604400	0.421226	0.187737	0.0248516
genus1	rs13231526	0.231744	0.193432	0.230893
genus1	rs2717140	0.297383	0.190544	0.118594
genus1	rs55719207	0.340214	0.189474	0.0725637
genus1	rs6664405	0.3792	0.188937	0.0447476
genus1	rs7680684	0.382903	0.193894	0.0482899
genus1	rs9490822	0.409734	0.191463	0.0323537
genus1	rs9915817	0.314608	0.189431	0.096753
genus1	rs10794359	-0.131761	0.205179	0.520759
genus1	rs1563175	-0.234773	0.155798	0.131835
genus1	rs17012738	-0.0960249	0.204774	0.639118
genus1	rs17096874	-0.0125166	0.184665	0.945961
genus1	rs356049	-0.08231	0.195796	0.674204
genus1	rs4244069	-0.116423	0.206899	0.573637
genus1	rs4506496	-0.0826558	0.203774	0.685018
genus1	rs712981	-0.212049	0.179796	0.238244
genus1	rs79598899	-0.0843364	0.199618	0.672668
genus1	rs816292	-0.115793	0.208564	0.578764
genus1	rs9299345	-0.062345	0.193796	0.747677
genus1	rs10502061	0.206821	0.208885	0.322116
genus1	rs2014785	0.178785	0.207945	0.389917
genus1	rs2396460	0.0909513	0.208088	0.662053
genus1	rs2804244	0.151818	0.208329	0.466158
genus1	rs3900776	0.166173	0.203774	0.414798
genus1	rs60983350	0.109528	0.207767	0.598077
genus1	rs62157625	0.0836519	0.210728	0.691393
genus1	rs62215703	0.167765	0.208907	0.421938
genus1	rs6474958	0.137453	0.206531	0.505709
genus1	rs6726833	0.195209	0.206763	0.345106
genus1	rs6854026	0.181784	0.20794	0.382002
genus1	rs7193624	0.0874309	0.205083	0.669875
genus1	rs78735375	0.122942	0.209123	0.556604
genus1	rs1007475	-0.00677548	0.0826502	0.934664
genus1	rs11761679	-0.0579426	0.082753	0.48381
genus1	rs142855850	-0.0646646	0.0834453	0.438379
genus1	rs16934069	-0.0646753	0.0824812	0.432969
genus1	rs16941336	-0.0360468	0.0827196	0.663003
genus1	rs17163238	-0.0651399	0.0829269	0.432154
genus1	rs4537857	-0.0668648	0.083244	0.421837
genus1	rs486484	-0.0401803	0.0827044	0.627087
genus1	rs4928024	-0.0401242	0.0842506	0.633897
genus1	rs72723662	-0.0415965	0.0853996	0.626201
genus1	rs74622183	-0.0656353	0.0830715	0.429466
genus1	rs77356209	-0.0590279	0.0820182	0.471714
genus1	rs7752361	-0.0149807	0.0833429	0.85735
genus1	rs7763512	-0.0664147	0.0832875	0.42521
genus1	rs9349693	-0.051651	0.0827471	0.532494
genus1	rs12404911	-0.0807859	0.189833	0.670426
genus1	rs212393	0.0877637	0.181542	0.628788
genus1	rs73128290	-0.0184527	0.205691	0.928517
genus1	rs7742829	-0.127314	0.18345	0.487683
genus1	rs10461257	-0.0384099	0.317073	0.903581
genus1	rs17081797	0.0613007	0.27127	0.821219
genus1	rs62132810	-0.337722	0.282207	0.231417
genus1	rs62190261	-0.0716852	0.32013	0.822816
genus1	rs62467127	-0.044873	0.304273	0.882756
genus1	rs73952017	0.0466591	0.295139	0.874384
genus1	rs78521377	-0.113362	0.304289	0.709487
genus1	rs892686	-0.0382735	0.316438	0.90373
genus1	rs10506058	-0.2465	0.184538	0.181626
genus1	rs1942371	-0.256151	0.188598	0.174406
genus1	rs40656	-0.258682	0.192819	0.179733
genus1	rs4869133	-0.469819	0.142717	0.000994891
genus1	rs61267978	-0.195536	0.150468	0.193765
genus1	rs6577484	-0.292734	0.189038	0.12149
genus1	rs6890185	-0.27721	0.192142	0.149095
genus1	rs10890671	0.199442	0.310619	0.520821
genus1	rs11597285	0.0189736	0.31875	0.952534
genus1	rs1496626	-0.059308	0.270438	0.826413
genus1	rs149807560	0.0858798	0.329781	0.794544
genus1	rs2103510	0.0602076	0.325503	0.853254
genus1	rs62448871	0.237928	0.292262	0.415592
genus1	rs73052258	-0.0281723	0.292009	0.923141
genus1	rs75672793	0.188461	0.303155	0.534162
genus1	rs9541268	0.167616	0.323289	0.60413
genus1	rs112893842	0.0327599	0.178887	0.854695
genus1	rs1582238	0.0346208	0.182922	0.849885
genus1	rs2892880	-0.0532987	0.18065	0.767965
genus1	rs4344384	-0.0115986	0.180874	0.948871
genus1	rs4677103	-0.0489538	0.181814	0.787735
genus1	rs55658617	-0.0345638	0.178783	0.846702
genus1	rs72731813	0.041748	0.178398	0.814972
genus1	rs9608282	0.0366216	0.175409	0.834622
genus1	rs9725395	0.0139305	0.187157	0.940666
genus1	rs12031543	0.0175845	0.250513	0.944039
genus1	rs13066142	0.226073	0.264014	0.391836
genus1	rs16863365	0.218445	0.249062	0.380449
genus1	rs2032031	0.110396	0.26278	0.674407
genus1	rs2590913	0.158261	0.271869	0.560484
genus1	rs2853179	0.171527	0.272035	0.528346
genus1	rs4797774	0.361687	0.216723	0.095139
genus1	rs6580353	0.051926	0.226944	0.81902
genus1	rs72647089	0.182091	0.266887	0.495062
genus1	rs10138457	0.0223031	0.189515	0.906317
genus1	rs10938938	-0.0236749	0.186639	0.89906
genus1	rs11071887	-0.0694688	0.188265	0.712132
genus1	rs11166701	-0.0185989	0.189465	0.921801
genus1	rs2314294	0.00734768	0.18742	0.968727
genus1	rs2435610	0.0107234	0.186552	0.954161
genus1	rs4747450	0.0128741	0.186465	0.944955
genus1	rs4753063	-0.00418291	0.187546	0.982206
genus1	rs75416973	0.0601407	0.18775	0.748724
genus1	rs764177	0.0219604	0.187024	0.906527
genus1	rs76680460	0.00176783	0.189254	0.992547
genus1	rs112205261	0.0215917	0.136186	0.874027
genus1	rs13070736	-0.10325	0.133747	0.440126
genus1	rs1784446	-0.116889	0.133995	0.383025
genus1	rs2223081	-0.0342383	0.134168	0.798577
genus1	rs2240838	-0.0346374	0.135057	0.797592
genus1	rs3851328	-0.0234007	0.133706	0.861067
genus1	rs4985746	-0.0748442	0.130562	0.566478
genus1	rs6430926	-0.0859479	0.133367	0.519285
genus1	rs67490567	-0.0848481	0.134483	0.528091
genus1	rs76663501	-0.0377513	0.131946	0.774792
genus1	rs11027642	-0.143176	0.153464	0.350839
genus1	rs11079158	-0.184591	0.159168	0.246161
genus1	rs11938607	-0.16508	0.157607	0.294909
genus1	rs12257723	-0.14486	0.153715	0.345992
genus1	rs12710729	-0.188186	0.159299	0.23747
genus1	rs13258851	-0.275025	0.134233	0.0404757
genus1	rs1508033	-0.254522	0.138881	0.0668518
genus1	rs1553971	-0.138756	0.155651	0.372685
genus1	rs2683098	-0.146446	0.153748	0.340842
genus1	rs3812426	-0.241027	0.142662	0.0911247
genus1	rs4462860	-0.173147	0.160126	0.279556
genus1	rs10098492	-0.164698	0.205784	0.423513
genus1	rs114731706	-0.215205	0.207081	0.298696
genus1	rs2051957	-0.189565	0.208158	0.362464
genus1	rs3017103	-0.106799	0.213378	0.616713
genus1	rs73331712	-0.115555	0.236065	0.624486
genus1	rs77655283	-0.0591269	0.208368	0.776593
genus1	rs10147907	0.2678	0.123401	0.0299945
genus1	rs11818408	0.132184	0.149849	0.377714
genus1	rs11876297	0.17617	0.15783	0.264336
genus1	rs151257695	0.204688	0.151351	0.176247
genus1	rs1768152	0.140045	0.147137	0.341199
genus1	rs2733072	0.158047	0.15606	0.311188
genus1	rs3771393	0.107198	0.139667	0.442767
genus1	rs6934739	0.184986	0.154631	0.231577
genus1	rs7104872	0.147685	0.149842	0.324328
genus1	rs10248854	0.203044	0.259894	0.434652
genus1	rs10797540	0.145064	0.258794	0.575113
genus1	rs143694765	0.172119	0.260535	0.508845
genus1	rs2884897	0.243492	0.257105	0.343612
genus1	rs314726	0.11478	0.260582	0.659594
genus1	rs35398954	0.221014	0.272159	0.416748
genus1	rs59427698	0.0826816	0.255574	0.746306
genus1	rs62547233	0.32335	0.257687	0.209544
genus1	rs10439674	0.306677	0.173403	0.0769634
genus1	rs167879	0.332665	0.173556	0.0552693
genus1	rs1864685	0.283473	0.173893	0.103068
genus1	rs2025938	0.354651	0.173781	0.0412708
genus1	rs206581	0.311383	0.173524	0.0727395
genus1	rs2132128	0.344731	0.173447	0.0468635
genus1	rs3303	0.385279	0.173463	0.0263437
genus1	rs4378146	0.302591	0.174964	0.0837292
genus1	rs60254196	0.261134	0.173954	0.133313
genus1	rs62187631	0.337176	0.17544	0.0546189
genus1	rs62353480	0.32276	0.174678	0.0646388
genus1	rs6515626	0.247586	0.179488	0.16777
genus1	rs704418	0.290463	0.173889	0.0948402
genus1	rs73103914	0.322451	0.172783	0.0620111
genus1	rs792108	0.30967	0.174163	0.0753965
genus1	rs8028026	0.32484	0.173357	0.0609555
genus1	rs8063430	0.351211	0.1733	0.0427032
genus1	rs9905659	0.33961	0.173672	0.0505277
genus1	rs13412653	-0.0183479	0.118802	0.877262
genus1	rs16955299	-0.0235584	0.120845	0.845434
genus1	rs322296	-0.0312971	0.118125	0.791048
genus1	rs35042269	-0.0141324	0.119724	0.906035
genus1	rs3765837	-0.0355121	0.118309	0.764052
genus1	rs4596722	-0.0121309	0.117736	0.917935
genus1	rs72714787	0.0528953	0.113078	0.639943
genus1	rs72939513	-0.0723195	0.109764	0.509982
genus1	rs7294633	-0.101566	0.112025	0.3646
genus1	rs768830	-0.0208628	0.119583	0.861501
genus1	rs10262702	0.112355	0.147869	0.44736
genus1	rs11258178	0.160498	0.148767	0.280653
genus1	rs12226153	0.118456	0.145003	0.413975
genus1	rs17067892	0.139506	0.147933	0.345662
genus1	rs1859797	0.128428	0.147828	0.384977
genus1	rs2276760	0.101433	0.147586	0.491906
genus1	rs2731794	0.114928	0.145753	0.430398
genus1	rs2930225	0.133701	0.148069	0.366545
genus1	rs4113676	0.156235	0.146713	0.286919
genus1	rs4784055	0.182486	0.150698	0.22592
genus1	rs62240188	0.18195	0.150538	0.22679
genus1	rs6934519	0.0710447	0.147915	0.631009
genus1	rs716604	0.148191	0.149263	0.320799
genus1	rs7170984	0.105759	0.147703	0.473977
genus1	rs72982915	0.127359	0.152421	0.403395
genus1	rs9823439	0.0891986	0.147508	0.545376
genus1	rs10093861	0.0832238	0.241793	0.730701
genus1	rs1254846	0.19865	0.237958	0.403824
genus1	rs1363769	0.130947	0.250403	0.601011
genus1	rs2322265	0.193931	0.228224	0.39547
genus1	rs2862811	0.153826	0.237938	0.517958
genus1	rs35035870	0.0806594	0.250481	0.747439
genus1	rs3999074	-0.0412787	0.17919	0.81781
genus1	rs4452603	0.169092	0.234046	0.470005
genus1	rs7249113	0.128311	0.24632	0.602427
genus1	rs72793667	0.116179	0.241483	0.63044
genus1	rs9308097	0.114328	0.244343	0.639855
genus1	rs9788306	0.0435241	0.230784	0.850412
genus1	rs12131224	-0.0375326	0.156399	0.810346
genus1	rs2050911	-0.0725088	0.156069	0.642222
genus1	rs2371284	0.035806	0.15464	0.816892
genus1	rs437876	0.0471406	0.156836	0.76374
genus1	rs4981345	0.0586892	0.154705	0.704419
genus1	rs573933	-0.0139281	0.155116	0.928453
genus1	rs62496417	0.0447461	0.154282	0.771795
genus1	rs7341608	0.0241409	0.152956	0.874591
genus1	rs74034332	0.0318299	0.158315	0.840656
genus1	rs78848836	-0.0379758	0.156365	0.80811
genus1	rs9403580	0.000130428	0.156344	0.999334
genus1	rs985416	-0.0343691	0.156879	0.826587
genus1	rs10741777	0.0705633	0.144063	0.62427
genus1	rs10793103	0.131532	0.165188	0.425885
genus1	rs10801803	0.238248	0.142435	0.0943916
genus1	rs13024781	0.115568	0.154118	0.453335
genus1	rs57091572	0.205731	0.153831	0.181097
genus1	rs61944774	0.175812	0.162996	0.280752
genus1	rs62277846	0.203976	0.156901	0.193592
genus1	rs67078837	0.192049	0.161302	0.233802
genus1	rs75356640	0.172808	0.165562	0.296595
genus1	rs955844	0.117208	0.154102	0.446902
genus1	rs12693845	0.0444	0.147863	0.763965
genus1	rs1530559	-0.0308115	0.184482	0.867358
genus1	rs16861661	-0.0967019	0.173644	0.577597
genus1	rs62314653	-0.0820778	0.178323	0.645319
genus1	rs7399658	0.0555178	0.145059	0.701923
genus1	rs768253	-0.0769457	0.176123	0.662194
genus1	rs77478751	-0.0554252	0.208758	0.790625
genus1	rs921925	-0.0552086	0.183235	0.763186
genus1	rs11620597	-0.427095	0.228599	0.0617175
genus1	rs1187983	-0.364536	0.23594	0.122338
genus1	rs146541147	-0.323226	0.201086	0.107967
genus1	rs2724813	-0.361208	0.244415	0.139448
genus1	rs2842896	-0.471635	0.232014	0.0420738
genus1	rs2863363	-0.412196	0.238559	0.0840134
genus1	rs3125832	-0.356448	0.233858	0.127456
genus1	rs61884471	-0.53808	0.222258	0.0154793
genus1	rs72948274	-0.28991	0.210961	0.169368
genus1	rs8006832	-0.481897	0.218557	0.0274609
genus1	rs115602804	0.0434958	0.399333	0.913265
genus1	rs4236095	-0.275918	0.321854	0.391291
genus1	rs60884758	0.133057	0.33238	0.688923
genus1	rs6657302	-0.106523	0.387212	0.783238
genus1	rs7298818	-0.0962708	0.39417	0.807047
genus1	rs10031059	-0.0357634	0.118117	0.762058
genus1	rs11001941	0.009033	0.119082	0.939534
genus1	rs12069354	-0.00551395	0.115687	0.961985
genus1	rs2054133	-0.0395802	0.116077	0.733116
genus1	rs36121075	0.0054317	0.118373	0.963401
genus1	rs413827	0.0412323	0.117015	0.724563
genus1	rs5770862	-0.0518878	0.117039	0.657523
genus1	rs6918730	-0.00827316	0.114222	0.942259
genus1	rs7033353	0.039338	0.11658	0.73579
genus1	rs72850165	0.00716623	0.1148	0.950226
genus1	rs74592222	-0.00180456	0.116382	0.987629
genus1	rs77681628	0.00238891	0.118969	0.98398
genus1	rs10279978	-0.152522	0.184797	0.409173
genus1	rs11221428	-0.0696803	0.182872	0.703179
genus1	rs16843578	-0.130774	0.183218	0.475373
genus1	rs28603357	-0.070258	0.182797	0.700719
genus1	rs34302036	-0.115746	0.187581	0.537204
genus1	rs61841503	-0.148202	0.187504	0.429299
genus1	rs62504452	-0.139655	0.184393	0.448825
genus1	rs7109293	-0.116347	0.188674	0.537463
genus1	rs75200530	-0.190396	0.182264	0.296202
genus1	rs75987356	-0.133313	0.191378	0.486056
genus1	rs77702691	-0.189023	0.179368	0.291961
genus1	rs9389266	-0.00834797	0.179776	0.962963
genus1	rs9567264	-0.0728703	0.180489	0.686405
genus1	rs116969552	-0.0435854	0.183642	0.812394
genus1	rs11992182	-0.0689701	0.188796	0.714876
genus1	rs2548459	-0.21562	0.175911	0.220298
genus1	rs35362464	-0.0548715	0.18419	0.765774
genus1	rs61060922	-0.0689229	0.190349	0.717288
genus1	rs663262	-0.108753	0.189813	0.566679
genus1	rs67479537	-0.0387193	0.178258	0.828045
genus1	rs71414120	-0.199601	0.191007	0.296026
genus1	rs72991535	-0.0862055	0.190371	0.650671
genus1	rs73176030	-0.0881523	0.191168	0.644709
genus1	rs77193512	-0.0839828	0.19412	0.66528
genus1	rs792058	-0.108875	0.191408	0.569482
genus1	rs79968172	-0.131026	0.187982	0.485793
genus1	rs9555756	-0.0563993	0.182048	0.756709
genus1	rs11241747	0.0283714	0.226184	0.900179
genus1	rs11586410	0.133766	0.199409	0.502341
genus1	rs12642039	0.00720079	0.22875	0.974888
genus1	rs12731	-0.0126556	0.226595	0.95546
genus1	rs13087692	0.0871749	0.211109	0.679652
genus1	rs136761	-0.0224355	0.227285	0.921368
genus1	rs147475196	-0.0912307	0.230118	0.691771
genus1	rs35559912	-0.0650323	0.218701	0.766194
genus1	rs4814689	-0.0155254	0.223735	0.944678
genus1	rs5994253	-0.0162308	0.228289	0.94332
genus1	rs62027366	0.0355998	0.22542	0.874514
genus1	rs6681678	0.0863593	0.185308	0.641194
genus1	rs7573569	-0.0353884	0.222252	0.873491
genus1	rs10490280	-0.0921757	0.198353	0.642142
genus1	rs11243416	-0.238018	0.203841	0.242943
genus1	rs11613919	-0.159524	0.224996	0.47832
genus1	rs16959793	-0.129941	0.220918	0.556406
genus1	rs2523124	-0.172264	0.223451	0.44075
genus1	rs3013089	-0.215621	0.217946	0.322499
genus1	rs4452755	-0.201465	0.223697	0.367793
genus1	rs4532474	-0.12208	0.216266	0.572421
genus1	rs646327	-0.315605	0.181918	0.0827632
genus1	rs6759615	-0.144062	0.223565	0.519325
genus1	rs73341549	-0.150355	0.232949	0.518641
genus1	rs78720113	-0.157927	0.2255	0.483714
genus1	rs10976229	-0.0211103	0.164893	0.898129
genus1	rs11961899	0.0616862	0.164742	0.708076
genus1	rs12125734	0.0271932	0.168325	0.871658
genus1	rs2248146	0.00592988	0.165189	0.971364
genus1	rs3800154	-0.0655469	0.166199	0.693295
genus1	rs511258	0.0543109	0.163794	0.740206
genus1	rs550351	0.0156646	0.168382	0.92588
genus1	rs6769553	-0.0530687	0.167483	0.751349
genus1	rs7569771	-0.0269744	0.165117	0.870231
genus1	rs872501	0.0239815	0.164231	0.883903
genus1	rs9818949	0.0943978	0.165809	0.56914
genus1	rs10873449	0.145736	0.197678	0.460977
genus1	rs10937802	0.0686694	0.189138	0.716556
genus1	rs10950694	0.0599159	0.189637	0.75204
genus1	rs114279581	0.0781036	0.205581	0.704008
genus1	rs12288512	0.106863	0.201242	0.595408
genus1	rs12458218	0.158186	0.194819	0.416811
genus1	rs2893871	0.128594	0.19882	0.51777
genus1	rs34781347	0.214416	0.207316	0.301021
genus1	rs55793120	0.208441	0.175969	0.236202
genus1	rs72776570	0.0852284	0.195971	0.663633
genus1	rs7449320	0.0624765	0.187232	0.738617
genus1	rs7555878	0.0984868	0.198545	0.619864
genus1	rs7586445	0.0729617	0.192698	0.704961
genus1	rs898577	0.189109	0.18563	0.308327
genus1	rs113006825	-0.0705459	0.137386	0.607611
genus1	rs12508214	0.000484346	0.136916	0.997177
genus1	rs138460696	-0.0652846	0.136975	0.633634
genus1	rs1550196	-0.0475761	0.137749	0.729806
genus1	rs2058609	-0.0262704	0.136985	0.847918
genus1	rs2192926	-0.0335811	0.138682	0.808668
genus1	rs4079028	-0.0646223	0.137775	0.639038
genus1	rs4708333	-0.0389249	0.137959	0.77783
genus1	rs6952765	-0.0749548	0.136283	0.582324
genus1	rs758191	-0.022768	0.14305	0.873542
genus1	rs78410648	0.00578954	0.137302	0.966366
genus1	rs9558661	-0.0338076	0.136793	0.804796
genus1	rs12597105	-0.159848	0.375092	0.669994
genus1	rs2820282	-0.1527	0.379573	0.687467
genus1	rs682403	-0.0446975	0.336455	0.894313
genus1	rs6958419	-0.412989	0.24678	0.0942271
genus1	rs73218807	0.013336	0.402353	0.973559
genus1	rs7441445	-0.288707	0.350641	0.410299
genus1	rs10167839	-0.134408	0.234043	0.565772
genus1	rs11783695	-0.210704	0.206009	0.306409
genus1	rs17781867	-0.146679	0.230699	0.524905
genus1	rs3819978	-0.160116	0.234731	0.49516
genus1	rs6105066	-0.0649957	0.239658	0.786236
genus1	rs6493760	-0.0850823	0.240536	0.723549
genus1	rs7117576	-0.0392333	0.228226	0.863512
genus1	rs7583465	-0.126968	0.237699	0.593235
genus1	rs78572139	-0.0143604	0.244778	0.953217
genus1	rs78613526	0.0765116	0.214872	0.72178
genus1	rs12406309	-0.0287654	0.155048	0.852816
genus1	rs12986628	-0.0738725	0.155105	0.633879
genus1	rs1819812	-0.0374261	0.153122	0.806905
genus1	rs2368224	-0.0702379	0.162206	0.665004
genus1	rs2846589	-0.0640311	0.154832	0.679202
genus1	rs2997412	-0.0158011	0.154787	0.918691
genus1	rs4400279	-0.0647394	0.154849	0.675888
genus1	rs4799823	-0.010342	0.157113	0.947517
genus1	rs55707116	-0.0247578	0.154088	0.872351
genus1	rs58681734	-0.0643053	0.156068	0.680315
genus1	rs61791565	-0.0913482	0.155001	0.555633
genus1	rs75140805	-0.0455706	0.156901	0.771479
genus1	rs7635831	-0.0123753	0.156166	0.936838
genus1	rs7693984	-0.0354213	0.153722	0.817762
genus1	rs78120384	0.0318862	0.171254	0.852294
genus1	rs11597105	-0.123344	0.136249	0.365313
genus1	rs11864644	-0.344803	0.135809	0.0111208
genus1	rs12136548	-0.209693	0.165778	0.205905
genus1	rs12989336	-0.234665	0.164936	0.154805
genus1	rs13163520	-0.228551	0.170219	0.179374
genus1	rs2909242	-0.200602	0.165452	0.225341
genus1	rs3124783	-0.22344	0.165894	0.178019
genus1	rs4388134	-0.199899	0.164159	0.223331
genus1	rs62167033	-0.26517	0.156664	0.0905324
genus1	rs78399089	-0.216591	0.168558	0.198804
genus1	rs934940	-0.210753	0.163907	0.19851
genus1	rs10036909	-0.185507	0.327287	0.570848
genus1	rs11787826	0.277599	0.249676	0.266207
genus1	rs1990708	0.0110176	0.370228	0.976259
genus1	rs2017373	-0.0569705	0.390625	0.884044
genus1	rs7225245	-0.156609	0.362528	0.665747
genus1	rs11054680	-0.147855	0.179487	0.410073
genus1	rs11666533	0.00559	0.174229	0.974405
genus1	rs149744580	-0.0931246	0.17844	0.601754
genus1	rs2834977	-0.0706421	0.176259	0.688578
genus1	rs2952020	-0.0629102	0.175166	0.719486
genus1	rs3734633	-0.0968072	0.173038	0.575851
genus1	rs4869133	0.0664695	0.188271	0.724049
genus1	rs55756211	-0.0131591	0.173802	0.939648
genus1	rs7199484	-0.0384441	0.175816	0.826915
genus2	rs111862613	0.464245	0.1814	0.0104903
genus2	rs117107102	0.488041	0.188883	0.00977119
genus2	rs11729256	0.407079	0.178153	0.0223127
genus2	rs12908520	0.494871	0.17937	0.0057989
genus2	rs2602429	0.464412	0.180562	0.0101103
genus2	rs4242783	0.540874	0.179441	0.00257643
genus2	rs4936098	0.471936	0.179617	0.00860249
genus2	rs61779207	0.525485	0.179913	0.0034917
genus2	rs74542928	0.51653	0.17631	0.00339319
genus2	rs9349825	0.417018	0.177795	0.0190015
genus2	rs941682	0.397284	0.178169	0.0257597
genus2	rs2154444	-0.181589	0.261795	0.487914
genus2	rs34619204	-0.320714	0.148987	0.0313473
genus2	rs4364940	-0.0395359	0.226574	0.861477
genus2	rs4680035	-0.0975006	0.257092	0.704507
genus2	rs58212166	-0.0692278	0.252839	0.784237
genus2	rs11585893	0.112742	0.288867	0.696322
genus2	rs13207588	-0.0801816	0.273013	0.768994
genus2	rs1340391	0.107048	0.269109	0.690787
genus2	rs17619981	-0.0675037	0.28563	0.813175
genus2	rs2023437	0.119883	0.276987	0.665152
genus2	rs66710942	0.112999	0.274864	0.680992
genus2	rs6795673	0.0149449	0.279165	0.957306
genus2	rs11155559	0.141006	0.205332	0.492257
genus2	rs12909713	0.214867	0.195588	0.271957
genus2	rs13242616	0.136449	0.204152	0.503898
genus2	rs199035	0.217535	0.194877	0.264308
genus2	rs2276875	0.111951	0.202839	0.581002
genus2	rs2428166	0.0907843	0.190527	0.633726
genus2	rs35177866	0.173826	0.202331	0.390276
genus2	rs62251337	0.169736	0.202982	0.403035
genus2	rs72684847	0.0692931	0.196508	0.724371
genus2	rs76181748	0.181847	0.208236	0.382512
genus2	rs77455852	0.269143	0.197071	0.172028
genus2	rs79795328	0.104511	0.198709	0.598923
genus2	rs10084203	-0.385219	0.223802	0.0852057
genus2	rs12034718	-0.386324	0.233294	0.0977309
genus2	rs12585793	-0.551758	0.257673	0.0322492
genus2	rs2017189	-0.302332	0.22925	0.18724
genus2	rs4962426	-0.242866	0.228251	0.287315
genus2	rs56221232	-0.369963	0.228838	0.105942
genus2	rs62478070	-0.313764	0.241092	0.193112
genus2	rs7322368	-0.331058	0.227583	0.145761
genus2	rs11228830	-0.129257	0.175438	0.461265
genus2	rs113054641	-0.0387122	0.175674	0.825588
genus2	rs12304031	-0.0155874	0.171201	0.927455
genus2	rs12458763	-0.0683368	0.173572	0.693796
genus2	rs1862649	0.0114807	0.171324	0.946572
genus2	rs2114713	-0.027023	0.174928	0.87723
genus2	rs62130338	-0.0396689	0.178535	0.824165
genus2	rs62390301	0.0232878	0.17456	0.89387
genus2	rs7083431	-0.122212	0.172639	0.479004
genus2	rs71428626	-0.0257436	0.169493	0.879277
genus2	rs72814525	-0.0801438	0.173225	0.64361
genus2	rs78453362	-0.0504553	0.173701	0.771456
genus2	rs9657374	-0.138581	0.172517	0.42181
genus2	rs11264403	0.00844533	0.281061	0.976029
genus2	rs115807074	0.0924896	0.243376	0.703924
genus2	rs116847295	-0.159633	0.226367	0.480689
genus2	rs12341505	0.0240993	0.2658	0.927757
genus2	rs2795528	-0.0554228	0.282313	0.844362
genus2	rs2817172	0.125749	0.235329	0.593097
genus2	rs550843	0.136741	0.251493	0.586636
genus2	rs1010560	0.42697	0.199397	0.032249
genus2	rs12794898	0.381866	0.201487	0.0580604
genus2	rs1519491	0.371959	0.197797	0.0600393
genus2	rs1576241	0.480524	0.198081	0.0152705
genus2	rs2907920	0.459723	0.198333	0.0204531
genus2	rs4277593	0.298641	0.200776	0.136901
genus2	rs56405618	0.487576	0.2005	0.0150239
genus2	rs73031725	0.466915	0.201147	0.0202728
genus2	rs73167075	0.425325	0.198104	0.0317955
genus2	rs74101919	0.380607	0.196718	0.0530172
genus2	rs946513	0.343556	0.214647	0.109473
genus2	rs10070053	-0.112242	0.26339	0.670003
genus2	rs12634070	-0.195558	0.269714	0.468417
genus2	rs2482516	0.0240128	0.224696	0.914894
genus2	rs35890118	-0.229414	0.254385	0.367142
genus2	rs61823518	-0.209175	0.262131	0.424883
genus2	rs6677933	-0.210731	0.259949	0.417559
genus2	rs72680320	-0.0688741	0.250873	0.783672
genus2	rs9426473	-0.261861	0.247383	0.289816
genus2	rs10501370	-0.00692687	0.213207	0.974082
genus2	rs10798999	0.0509733	0.219166	0.816089
genus2	rs10808115	0.0818454	0.213241	0.701114
genus2	rs117748144	-0.0463288	0.196744	0.813838
genus2	rs13116360	0.119347	0.217522	0.583234
genus2	rs17074066	0.0422217	0.214311	0.843819
genus2	rs17474256	0.094904	0.207214	0.646952
genus2	rs281379	0.134811	0.184266	0.464408
genus2	rs28584818	0.0406595	0.223544	0.855673
genus2	rs60254196	-0.0267974	0.203078	0.895019
genus2	rs630939	0.028989	0.218168	0.894292
genus2	rs6550770	-0.0496415	0.216014	0.818242
genus2	rs74018587	0.0385874	0.229077	0.866232
genus2	rs78056098	0.0760494	0.214044	0.722367
genus2	rs949971	0.0477446	0.218755	0.82723
genus2	rs10263623	-0.0188168	0.0994859	0.849983
genus2	rs10458299	-0.0548614	0.103668	0.596664
genus2	rs11006576	-0.0076483	0.101151	0.939727
genus2	rs113893692	-0.00847166	0.103657	0.934863
genus2	rs34297067	0.0239444	0.102792	0.815807
genus2	rs61841040	-0.0893084	0.102275	0.382546
genus2	rs6818880	-0.0241367	0.105678	0.819336
genus2	rs77910827	-0.0930126	0.102026	0.361951
genus2	rs7827125	-0.0467794	0.106302	0.659894
genus2	rs7880204	-0.0448437	0.106346	0.673261
genus2	rs9425984	-0.0518048	0.105392	0.623041
genus2	rs12129908	0.093704	0.195689	0.632051
genus2	rs12423772	0.125474	0.201463	0.533406
genus2	rs2973294	0.0046113	0.197527	0.981375
genus2	rs34561138	0.122436	0.193608	0.527131
genus2	rs440215	0.0647926	0.198606	0.744245
genus2	rs11617697	-0.139204	0.180002	0.439318
genus2	rs12964517	-0.0390151	0.176811	0.825357
genus2	rs13082419	-0.108271	0.175158	0.536486
genus2	rs16884680	-0.0268141	0.177365	0.879833
genus2	rs35179274	-0.0525286	0.175811	0.765108
genus2	rs3809430	-0.0115551	0.176342	0.947755
genus2	rs57199565	-0.0132072	0.178397	0.940984
genus2	rs66746423	-0.037568	0.177114	0.83202
genus2	rs6704822	-0.0215192	0.176134	0.90276
genus2	rs72783037	-0.0487799	0.176965	0.782819
genus2	rs73615400	-0.0324533	0.177615	0.85502
genus2	rs73849225	-0.0181291	0.176984	0.918413
genus2	rs78250280	-0.0739627	0.176698	0.675522
genus2	rs876734	-0.0438142	0.177376	0.804899
genus2	rs9316536	-0.0796694	0.177732	0.653969
genus2	rs10140184	0.171358	0.19776	0.386221
genus2	rs10917203	-0.000186943	0.23031	0.999352
genus2	rs112176119	-0.0138142	0.23024	0.952156
genus2	rs13239072	0.093367	0.237736	0.694516
genus2	rs17830032	0.120389	0.251256	0.631832
genus2	rs1999224	0.049445	0.238942	0.836062
genus2	rs2012708	0.0578743	0.238373	0.808169
genus2	rs2213117	0.117236	0.233381	0.61543
genus2	rs75586835	-0.068452	0.198424	0.73011
genus2	rs11126423	0.148121	0.30189	0.623678
genus2	rs11736617	0.0612723	0.321115	0.848674
genus2	rs12812672	0.0717352	0.327336	0.826534
genus2	rs149302	0.0751621	0.329635	0.819633
genus2	rs16840310	-0.0380071	0.329331	0.908123
genus2	rs16940167	0.00317329	0.33396	0.992419
genus2	rs17156849	0.0148108	0.332604	0.964482
genus2	rs62029761	0.0983042	0.327537	0.764077
genus2	rs62200412	-0.0172673	0.339631	0.959452
genus2	rs72730932	0.0048938	0.331347	0.988216
genus2	rs739451	0.0296453	0.332685	0.928995
genus2	rs9276029	-0.227101	0.214364	0.289409
genus2	rs9837139	0.149376	0.313124	0.633327
genus2	rs112362903	-0.313274	0.218975	0.152533
genus2	rs12049454	-0.235461	0.222873	0.290748
genus2	rs1426266	-0.217219	0.22087	0.325377
genus2	rs3842897	-0.263095	0.223275	0.23866
genus2	rs62414802	-0.153518	0.218058	0.481418
genus2	rs7119679	-0.0902031	0.226065	0.689883
genus2	rs76463770	-0.250554	0.224675	0.264771
genus2	rs8076666	-0.193635	0.220179	0.37916
genus2	rs10781340	0.0454726	0.153491	0.767035
genus2	rs111582866	0.0114263	0.160669	0.943304
genus2	rs35509	0.0379881	0.151776	0.802363
genus2	rs4822728	-0.0624331	0.155062	0.687219
genus2	rs76022354	0.0325569	0.169983	0.84811
genus2	rs78909003	0.00938432	0.173644	0.9569
genus2	rs9328464	0.0650297	0.155337	0.675482
genus2	rs9382510	-0.0579939	0.157776	0.713194
genus2	rs9895850	-0.0396479	0.156871	0.800467
genus2	rs10885477	0.129136	0.140744	0.358868
genus2	rs11080063	0.111636	0.141632	0.430573
genus2	rs111745969	0.0597041	0.144476	0.679426
genus2	rs113593397	0.0874128	0.143283	0.541814
genus2	rs116500994	0.0940469	0.140661	0.503747
genus2	rs12701617	0.0679884	0.141779	0.631556
genus2	rs1867876	0.0574108	0.143526	0.689155
genus2	rs4146507	0.0521037	0.142026	0.713722
genus2	rs73139538	0.0612372	0.139754	0.661256
genus2	rs77293403	0.0682502	0.141056	0.62849
genus2	rs80149660	0.0472143	0.147151	0.74832
genus2	rs9500080	0.155893	0.142299	0.273284
genus2	rs9529719	0.100273	0.142199	0.48071
genus2	rs967319	0.145125	0.14192	0.306505
genus2	rs10805326	0.00266773	0.236043	0.990983
genus2	rs11109097	-0.0397967	0.237049	0.866675
genus2	rs118030283	-0.0802239	0.233912	0.731623
genus2	rs16938435	-0.0874456	0.233892	0.7085
genus2	rs2098844	-0.118734	0.216471	0.583349
genus2	rs2702387	0.0580994	0.209489	0.781521
genus2	rs4327025	-0.020252	0.236394	0.931728
genus2	rs447950	-0.134591	0.213962	0.529321
genus2	rs478972	-0.0870328	0.240947	0.717941
genus2	rs6062862	0.0452704	0.205402	0.82556
genus2	rs62430350	-0.0368038	0.235761	0.875949
genus2	rs68093214	0.0277081	0.221546	0.900471
genus2	rs6875660	-0.0368771	0.232582	0.874019
genus2	rs893394	-0.0792491	0.231837	0.732478
genus2	rs9348442	-0.0365255	0.238057	0.878058
genus2	rs1031599	0.0864723	0.198593	0.663254
genus2	rs12566975	0.0545957	0.20078	0.785685
genus2	rs1528479	0.037756	0.201187	0.851139
genus2	rs1997204	0.12703	0.200234	0.525816
genus2	rs2385421	0.199471	0.201086	0.321214
genus2	rs3821998	0.0414528	0.202758	0.838006
genus2	rs4738679	0.128989	0.202	0.523109
genus2	rs6112314	0.0809086	0.20282	0.689954
genus2	rs615997	0.117027	0.202232	0.562806
genus2	rs62285313	0.116228	0.2022	0.565415
genus2	rs72829893	0.10909	0.210686	0.604608
genus2	rs78068103	0.0437538	0.204078	0.830237
genus2	rs789029	0.129396	0.200227	0.51812
genus2	rs117467633	-0.0395933	0.147429	0.788269
genus2	rs12127733	0.149959	0.158389	0.343755
genus2	rs12208226	-0.0127455	0.187021	0.945666
genus2	rs12863463	0.0327549	0.192043	0.86457
genus2	rs17067076	0.125501	0.181838	0.490081
genus2	rs1928659	0.0218715	0.190192	0.908448
genus2	rs1929743	0.0660402	0.189801	0.727883
genus2	rs3756315	0.00801991	0.186514	0.965702
genus2	rs6116753	0.0668162	0.188798	0.723411
genus2	rs2861203	0.679066	0.967221	0.482629
genus2	rs72776675	0.554235	0.772363	0.473014
genus2	rs9932954	1.52251	0.502955	0.00246878
genus2	rs10952110	-0.153319	0.192295	0.425271
genus2	rs11263806	-0.0655572	0.183925	0.721516
genus2	rs12611395	-0.17355	0.188646	0.357585
genus2	rs160061	-0.0924816	0.194657	0.634715
genus2	rs28540839	-0.122064	0.1977	0.536958
genus2	rs2880566	-0.0830031	0.18775	0.658422
genus2	rs4955932	-0.0944993	0.193896	0.625995
genus2	rs59805249	-0.141747	0.196757	0.471269
genus2	rs68104925	-0.127365	0.197484	0.518967
genus2	rs7073658	-0.0773592	0.189388	0.682929
genus2	rs73044693	-0.0725184	0.190021	0.702733
genus2	rs7616165	-0.253253	0.164522	0.123725
genus2	rs76193507	-0.126359	0.231413	0.585044
genus2	rs7832116	-0.0824887	0.190232	0.664563
genus2	rs954878	-0.151385	0.193505	0.434021
genus2	rs10417872	0.274132	0.125625	0.029099
genus2	rs123059	0.310786	0.126625	0.0141129
genus2	rs12621813	0.280062	0.123917	0.0238168
genus2	rs17168302	0.212735	0.12748	0.0951627
genus2	rs2293361	0.300199	0.123156	0.0147871
genus2	rs4766997	0.210928	0.126726	0.096025
genus2	rs55910161	0.293731	0.123316	0.0172217
genus2	rs6674304	0.280004	0.121493	0.0211838
genus2	rs7992246	0.216611	0.124782	0.082578
genus2	rs10202904	0.192267	0.159406	0.227762
genus2	rs1334944	0.363435	0.156997	0.0206178
genus2	rs4802933	0.198317	0.160602	0.216893
genus2	rs6776814	0.254269	0.146355	0.0823259
genus2	rs76029318	0.211366	0.158783	0.183136
genus2	rs894996	0.252608	0.159135	0.112427
genus2	rs10093869	-0.460697	0.258745	0.0749938
genus2	rs10423795	-0.555404	0.256249	0.0302014
genus2	rs28417404	-0.671271	0.249937	0.00723656
genus2	rs4793970	-0.501814	0.257498	0.0513184
genus2	rs6856150	-0.544968	0.259439	0.0356794
genus2	rs74553962	-0.649829	0.264408	0.0139841
genus2	rs77779484	-0.718131	0.264239	0.00657316
genus2	rs12206468	-0.272846	0.266222	0.30542
genus2	rs12925026	-0.199315	0.24807	0.421706
genus2	rs1954532	-0.39363	0.215413	0.0676508
genus2	rs28889936	-0.11629	0.201383	0.563631
genus2	rs62422654	-0.231501	0.264668	0.381745
genus2	rs72866977	-0.233931	0.262778	0.373346
genus2	rs751183	-0.325579	0.248095	0.189414
genus2	rs8076323	-0.353707	0.243703	0.146672
genus2	rs10464997	0.100633	0.111098	0.36504
genus2	rs11108500	0.0634993	0.111738	0.56984
genus2	rs111966731	0.139472	0.11272	0.215964
genus2	rs12002250	0.071546	0.109167	0.512221
genus2	rs1569853	0.0917543	0.109411	0.401682
genus2	rs36057338	0.0838318	0.108159	0.438294
genus2	rs3862635	0.0387031	0.110295	0.72566
genus2	rs4428215	0.104301	0.111934	0.351437
genus2	rs6000536	0.0789116	0.110174	0.473839
genus2	rs6993398	0.13219	0.110243	0.2305
genus2	rs736744	0.0221265	0.112367	0.843896
genus2	rs118038478	0.017431	0.104425	0.86743
genus2	rs12124567	0.0105663	0.103672	0.918819
genus2	rs12195431	0.0174802	0.105454	0.868344
genus2	rs2240542	0.0368235	0.104554	0.724691
genus2	rs2918132	-0.00986996	0.10495	0.925074
genus2	rs430270	-0.0167315	0.104767	0.873116
genus2	rs57404562	0.0337206	0.104355	0.746593
genus2	rs79263163	0.0699733	0.105458	0.507
genus2	rs9426434	0.0250794	0.105623	0.812313
genus2	rs9608249	0.00748132	0.103946	0.942623
genus2	rs9959718	0.0438875	0.104597	0.674786
genus2	rs12740451	-0.00436147	0.259758	0.986604
genus2	rs16910295	0.0659655	0.266603	0.804575
genus2	rs2160994	0.155031	0.248582	0.532849
genus2	rs2943022	-0.021832	0.254732	0.9317
genus2	rs302266	0.0756005	0.269193	0.778832
genus2	rs329182	0.0681611	0.269129	0.800063
genus2	rs55858165	0.0881141	0.27809	0.751354
genus2	rs57466170	0.151273	0.227447	0.505991
genus2	rs6445851	-0.0102948	0.258342	0.968213
genus2	rs6930661	0.0557031	0.267505	0.835048
genus2	rs75326254	0.125589	0.257091	0.625196
genus2	rs78753150	0.024375	0.271566	0.92848
genus2	rs9300744	-0.0649742	0.224657	0.772417
genus2	rs10827477	0.321458	0.223789	0.150879
genus2	rs113753996	0.182514	0.22968	0.42682
genus2	rs1223978	0.252497	0.221952	0.255278
genus2	rs1492620	0.176113	0.225318	0.434436
genus2	rs2482038	0.282688	0.223181	0.205287
genus2	rs2791343	0.281494	0.223102	0.207046
genus2	rs2833828	0.18534	0.222009	0.403812
genus2	rs4955951	0.294936	0.221099	0.182219
genus2	rs6121460	0.258715	0.223016	0.246018
genus2	rs79968837	0.31896	0.219624	0.146419
genus2	rs8053158	0.18436	0.221886	0.406044
genus2	rs10274562	-0.0352043	0.198009	0.858887
genus2	rs12636310	-0.0563117	0.199744	0.778005
genus2	rs12724320	-0.00296632	0.194884	0.987856
genus2	rs1416041	-0.0193223	0.208849	0.926287
genus2	rs2729556	-0.0183194	0.195669	0.925407
genus2	rs4490371	0.0414424	0.168325	0.805524
genus2	rs79113084	-0.125946	0.159315	0.429208
genus2	rs9729514	-0.147574	0.154796	0.340416
genus2	rs11581881	-0.0479188	0.207026	0.816955
genus2	rs12189346	-0.060079	0.206229	0.770805
genus2	rs12336782	-0.0202371	0.203671	0.920851
genus2	rs12485353	-0.0642218	0.205916	0.755129
genus2	rs12781711	0.0960846	0.207642	0.64355
genus2	rs16918863	-0.115662	0.206597	0.575587
genus2	rs2730183	0.0443931	0.204392	0.828055
genus2	rs4385846	0.0105314	0.204156	0.958859
genus2	rs75088940	-0.0565702	0.204355	0.781916
genus2	rs76973485	-0.0437024	0.217656	0.840865
genus2	rs9313055	-0.0164527	0.207812	0.936896
genus2	rs10495392	0.0120448	0.17757	0.94592
genus2	rs10791168	-0.0110349	0.179252	0.950913
genus2	rs10941294	0.00613702	0.180277	0.972844
genus2	rs115777838	0.0478497	0.212059	0.821479
genus2	rs12638134	-0.0144259	0.180874	0.936431
genus2	rs34402072	0.0370761	0.178639	0.835582
genus2	rs56105232	0.0163078	0.183441	0.929162
genus2	rs72809222	0.00505296	0.180144	0.977623
genus2	rs73186226	-0.0100014	0.179317	0.955521
genus2	rs853612	-0.0333034	0.179394	0.852724
genus2	rs995642	-0.0894279	0.179281	0.61791
genus2	rs10931481	0.0714266	0.249572	0.774728
genus2	rs12079579	0.11908	0.24327	0.624489
genus2	rs12539819	0.0587184	0.248434	0.813158
genus2	rs1391597	0.0840285	0.250466	0.737256
genus2	rs2047242	0.104707	0.248097	0.672994
genus2	rs2166943	0.024995	0.242681	0.917967
genus2	rs289410	-0.00443781	0.234429	0.984897
genus2	rs431418	-0.0720389	0.190262	0.704963
genus2	rs71386687	0.199969	0.23707	0.39895
genus2	rs73802842	0.0868298	0.252519	0.730955
genus2	rs9870933	0.176556	0.227489	0.437684
genus2	rs10028567	-0.0628388	0.23283	0.787244
genus2	rs10448310	-0.148997	0.248798	0.549261
genus2	rs11110281	-0.202337	0.254032	0.425741
genus2	rs11720390	-0.0763363	0.226232	0.735797
genus2	rs11764382	-0.120577	0.241571	0.617682
genus2	rs17708276	-0.291314	0.209187	0.16374
genus2	rs1918540	-0.201627	0.247206	0.414717
genus2	rs2370083	-0.204084	0.243828	0.402592
genus2	rs57646748	-0.175919	0.245491	0.47362
genus2	rs6806351	-0.239825	0.242354	0.322387
genus2	rs71481756	-0.108395	0.234248	0.643554
genus2	rs7916711	-0.286326	0.247679	0.247666
genus2	rs10898797	-0.0887033	0.113978	0.436423
genus2	rs112102233	-0.0550315	0.115424	0.633523
genus2	rs1232220	-0.0626272	0.114825	0.585468
genus2	rs17706273	-0.0914583	0.11391	0.422031
genus2	rs191093	-0.132522	0.11621	0.254135
genus2	rs4904512	-0.0615283	0.114178	0.58997
genus2	rs55799124	-0.116752	0.116559	0.316512
genus2	rs67476743	-0.0321566	0.118771	0.786588
genus2	rs6920448	-0.0770759	0.114475	0.500757
genus2	rs7019909	-0.146709	0.115765	0.205048
genus2	rs7333521	-0.104408	0.113767	0.358758
genus2	rs75091807	-0.0858883	0.115184	0.45587
genus2	rs7561370	-0.0962666	0.115708	0.405419
genus2	rs1882878	0.0731657	0.272431	0.788263
genus2	rs2013594	0.153822	0.293409	0.600098
genus2	rs55807413	0.0286823	0.233155	0.902093
genus2	rs62376424	0.309439	0.239644	0.19662
genus2	rs6656807	0.300416	0.240365	0.211361
genus2	rs742016	0.135131	0.286719	0.637426
genus2	rs11899949	0.140995	0.116746	0.227158
genus2	rs12512543	0.0440564	0.113694	0.698386
genus2	rs173120	0.0621256	0.123153	0.613938
genus2	rs1882775	0.101555	0.126018	0.420312
genus2	rs2546432	0.0801325	0.127134	0.528498
genus2	rs342302	0.0409333	0.114527	0.720783
genus2	rs4764863	0.117591	0.125181	0.347542
genus2	rs4895919	0.156916	0.109169	0.150614
genus2	rs56349194	0.051746	0.120017	0.666356
genus2	rs911666	0.0847546	0.127272	0.505456
genus3	rs1107244	0.0822921	0.23076	0.721381
genus3	rs11769002	-0.0096339	0.235975	0.967435
genus3	rs11958296	0.131323	0.230727	0.569239
genus3	rs12990744	-0.0166272	0.23331	0.943186
genus3	rs1689282	-0.00637455	0.234168	0.978283
genus3	rs2290844	-0.0272145	0.235386	0.907957
genus3	rs2450745	0.0576548	0.23085	0.80278
genus3	rs2875322	-0.0432075	0.231887	0.852186
genus3	rs34417064	0.031108	0.233905	0.894198
genus3	rs4810359	0.0774782	0.231575	0.737949
genus3	rs7129639	0.00769886	0.234455	0.973804
genus3	rs8130320	0.0424014	0.234226	0.856345
genus3	rs1901739	0.0179864	0.111704	0.872079
genus3	rs35110698	-0.000290837	0.110228	0.997895
genus3	rs35778461	-0.0619058	0.112692	0.582774
genus3	rs594561	0.0213716	0.111306	0.847737
genus3	rs602075	0.046634	0.116819	0.689748
genus3	rs6742198	0.0226715	0.113237	0.841313
genus3	rs76904847	-0.0524588	0.11129	0.637378
genus3	rs7898615	-0.0417794	0.111605	0.708143
genus3	rs10150232	0.37872	0.20306	0.0621714
genus3	rs11018566	0.347254	0.212846	0.102788
genus3	rs115414803	0.33959	0.212075	0.109318
genus3	rs1272208	0.373866	0.205646	0.0690633
genus3	rs1431492	0.304971	0.198147	0.123777
genus3	rs17734739	0.304428	0.197613	0.123433
genus3	rs34449434	0.449453	0.197922	0.0231555
genus3	rs4669806	0.417088	0.197995	0.0351561
genus3	rs6494922	0.374954	0.202084	0.0635341
genus3	rs6563550	0.434061	0.197985	0.0283509
genus3	rs7155595	0.288805	0.198599	0.145889
genus3	rs8005030	0.398123	0.20263	0.0494405
genus3	rs9347879	0.312368	0.198978	0.116448
genus3	rs12022129	0.0393721	0.16272	0.808809
genus3	rs182549	0.13422	0.184213	0.466238
genus3	rs2491158	0.0208521	0.161493	0.897262
genus3	rs2686790	0.060206	0.16179	0.7098
genus3	rs4957061	0.0631915	0.162148	0.696747
genus3	rs540489	0.0324108	0.161533	0.840976
genus3	rs55888705	0.00749128	0.161645	0.963036
genus3	rs5746486	0.0526024	0.162156	0.74564
genus3	rs62181700	0.0539715	0.162413	0.739655
genus3	rs7322849	-0.0320474	0.164533	0.845567
genus3	rs75344046	0.0861826	0.175084	0.622552
genus3	rs857444	0.0751918	0.162433	0.643429
genus3	rs11069458	0.0100241	0.184454	0.95666
genus3	rs1241171	0.0931506	0.187709	0.619718
genus3	rs1571225	0.0936648	0.191987	0.625642
genus3	rs1969927	-0.000657946	0.184594	0.997156
genus3	rs2728491	0.0342963	0.18676	0.854297
genus3	rs3827020	0.044984	0.191517	0.8143
genus3	rs4798126	0.139018	0.185934	0.454656
genus3	rs542415	0.0921659	0.191645	0.630573
genus3	rs60178956	0.0844226	0.189992	0.65679
genus3	rs6793291	-0.00788532	0.183778	0.965776
genus3	rs72676854	0.142932	0.184965	0.439669
genus3	rs7802841	0.125745	0.186981	0.501266
genus3	rs9899990	0.0634676	0.191888	0.740831
genus3	rs10090365	0.0255511	0.148639	0.863515
genus3	rs10809135	0.00115117	0.14826	0.993805
genus3	rs36155147	0.0551741	0.151849	0.716345
genus3	rs4294381	-0.0232137	0.148314	0.875625
genus3	rs4678258	0.0580422	0.148721	0.696332
genus3	rs6489992	0.0313965	0.148143	0.832159
genus3	rs6494306	0.0285434	0.150154	0.849235
genus3	rs7400877	0.0911792	0.14746	0.536358
genus3	rs9973954	0.0364463	0.148912	0.80665
genus3	rs11532348	0.088372	0.146134	0.545357
genus3	rs12684609	0.142985	0.147249	0.331527
genus3	rs12996055	0.0437957	0.147415	0.766398
genus3	rs143662916	0.0261334	0.148558	0.860362
genus3	rs189356	0.0550982	0.146742	0.707305
genus3	rs213863	0.0668823	0.148354	0.652113
genus3	rs305411	0.0810528	0.146887	0.581084
genus3	rs3828477	0.141984	0.148621	0.339405
genus3	rs72821405	0.0647314	0.147881	0.661584
genus3	rs74919520	0.0523006	0.146858	0.721743
genus3	rs10810043	-0.0644256	0.249578	0.7963
genus3	rs11077359	-0.166436	0.24952	0.504755
genus3	rs11080344	-0.0745895	0.251485	0.766774
genus3	rs13247359	-0.186656	0.251002	0.457092
genus3	rs13394391	-0.198799	0.25126	0.428822
genus3	rs178271	-0.0461259	0.244038	0.850084
genus3	rs4575475	-0.048633	0.251659	0.846763
genus3	rs7521171	-0.159182	0.253623	0.530244
genus3	rs8100692	-0.123795	0.255552	0.628086
genus3	rs11150408	-0.235988	0.273773	0.388696
genus3	rs12537781	-0.328274	0.26462	0.214773
genus3	rs13279148	-0.172389	0.249318	0.489287
genus3	rs1899291	-0.334314	0.266227	0.209206
genus3	rs3005511	-0.245881	0.274115	0.369719
genus3	rs345219	-0.0909974	0.241593	0.70643
genus3	rs3752849	-0.285411	0.29411	0.331835
genus3	rs4793307	-0.291292	0.274047	0.287814
genus3	rs62503162	-0.31155	0.262532	0.235341
genus3	rs73729431	-0.345918	0.24435	0.156874
genus3	rs1434153	-0.178339	0.140383	0.203952
genus3	rs16936671	-0.129171	0.140231	0.35698
genus3	rs17804233	-0.178795	0.14018	0.202144
genus3	rs2901723	-0.214645	0.139806	0.12471
genus3	rs340991	-0.163405	0.140085	0.243422
genus3	rs3804326	-0.168612	0.139427	0.22654
genus3	rs45480394	-0.197782	0.140132	0.158127
genus3	rs4697572	-0.197628	0.139948	0.157904
genus3	rs58236560	-0.195447	0.141092	0.165978
genus3	rs61806970	-0.242637	0.141001	0.0852847
genus3	rs622418	-0.196312	0.140227	0.161527
genus3	rs6474512	-0.196034	0.140025	0.161517
genus3	rs710230	-0.186588	0.141265	0.186556
genus3	rs7221249	-0.158697	0.143083	0.267378
genus3	rs9590927	-0.121483	0.139918	0.38526
genus3	rs112767262	-0.448547	0.220786	0.0421953
genus3	rs113127095	-0.185001	0.244544	0.449342
genus3	rs113513883	-0.310744	0.272501	0.254145
genus3	rs1154904	-0.173123	0.240888	0.472334
genus3	rs118526	-0.320384	0.267892	0.231718
genus3	rs2798105	-0.317358	0.271661	0.24272
genus3	rs4731451	-0.368886	0.258143	0.153004
genus3	rs57024273	-0.222921	0.255244	0.382464
genus3	rs592299	-0.260078	0.26875	0.333179
genus3	rs73208162	-0.357199	0.248094	0.149932
genus3	rs112617308	-0.046411	0.116101	0.689344
genus3	rs12151423	-0.0541218	0.116409	0.641982
genus3	rs13139592	-0.0217078	0.116076	0.85165
genus3	rs1384962	0.0157724	0.117852	0.893535
genus3	rs2913110	-0.0211768	0.116291	0.855502
genus3	rs4862235	-0.0731887	0.116739	0.530698
genus3	rs62348779	-0.0361452	0.117124	0.75762
genus3	rs6591893	-0.0541704	0.11659	0.642202
genus3	rs720439	-0.0394993	0.115777	0.732978
genus3	rs73199919	0.0241104	0.116506	0.836052
genus3	rs1020520	0.00913432	0.228938	0.968174
genus3	rs10444197	0.0437492	0.226784	0.847029
genus3	rs11052069	-0.107539	0.211947	0.611885
genus3	rs11720857	-0.117581	0.212218	0.579541
genus3	rs12906958	-0.0248996	0.229449	0.913584
genus3	rs17159861	0.0628794	0.229911	0.784473
genus3	rs2644213	0.0501112	0.226121	0.824616
genus3	rs4076415	0.0497376	0.226198	0.825961
genus3	rs62024432	0.00645705	0.230183	0.977621
genus3	rs6762473	0.0627852	0.222687	0.777987
genus3	rs76898927	0.0777238	0.223424	0.727934
genus3	rs79895140	-0.0463925	0.219175	0.832366
genus3	rs9648214	-0.0274402	0.228082	0.904239
genus3	rs182318	0.132644	0.317868	0.676465
genus3	rs2200429	0.00126291	0.420367	0.997603
genus3	rs265534	0.0259836	0.421212	0.950811
genus3	rs4583233	0.0434962	0.425805	0.918637
genus3	rs56080211	-0.206479	0.411205	0.615575
genus3	rs6923695	-0.271054	0.297271	0.36187
genus3	rs10131724	0.0451317	0.154867	0.770729
genus3	rs10923018	0.0166735	0.145309	0.908647
genus3	rs11637981	0.0637207	0.146409	0.663401
genus3	rs13025464	0.105476	0.128859	0.413047
genus3	rs139749	0.0206548	0.147466	0.888609
genus3	rs16891896	0.0662495	0.150068	0.658877
genus3	rs17519472	0.0187713	0.14625	0.897872
genus3	rs209813	0.0261306	0.147306	0.859202
genus3	rs2116427	0.045815	0.149142	0.758699
genus3	rs2229917	0.033841	0.147017	0.817949
genus3	rs2418654	-0.00170663	0.139662	0.99025
genus3	rs2817174	0.00533448	0.141865	0.970005
genus3	rs57340348	0.0946068	0.137996	0.492981
genus3	rs606117	0.0636982	0.14657	0.663858
genus3	rs6676699	-0.0110431	0.138831	0.9366
genus3	rs7000472	0.0206947	0.146669	0.887793
genus3	rs72836424	0.0834708	0.144792	0.564286
genus3	rs73139629	0.0657734	0.144921	0.649932
genus3	rs10927394	-0.0909538	0.192957	0.637377
genus3	rs114946999	-0.0823764	0.19168	0.66737
genus3	rs11776390	-0.0485254	0.184752	0.792819
genus3	rs1271565	-0.0591851	0.190417	0.755939
genus3	rs12753492	-0.117653	0.17772	0.507962
genus3	rs2835874	-0.131308	0.176414	0.456684
genus3	rs6910935	-0.0686654	0.194768	0.724426
genus3	rs75499067	-0.0169549	0.224317	0.93975
genus3	rs79656633	0.0338088	0.19236	0.860484
genus3	rs9536330	-0.0710253	0.190222	0.708864
genus3	rs114873521	0.254078	0.274399	0.354475
genus3	rs11811696	0.291005	0.271511	0.283811
genus3	rs12030302	0.386242	0.276978	0.163171
genus3	rs34066017	0.251891	0.269416	0.349813
genus3	rs806808	0.205397	0.273632	0.452873
genus3	rs12513188	0.153047	0.141895	0.28077
genus3	rs17586763	0.089689	0.137337	0.513719
genus3	rs1926302	0.207686	0.13716	0.129978
genus3	rs34187114	0.152134	0.1394	0.275121
genus3	rs35228298	0.168865	0.140757	0.230258
genus3	rs4541991	0.265608	0.134756	0.048721
genus3	rs607782	0.133201	0.138329	0.335582
genus3	rs62113381	0.166532	0.141221	0.238306
genus3	rs73011279	0.189556	0.139795	0.175112
genus3	rs75764681	0.10713	0.142446	0.452007
genus3	rs8113760	0.172799	0.141104	0.220719
genus3	rs10048062	0.0696912	0.135443	0.606873
genus3	rs12452946	0.0679575	0.138102	0.622661
genus3	rs1484873	0.0630363	0.148826	0.671889
genus3	rs17167098	0.166782	0.110176	0.130083
genus3	rs2154047	0.00752567	0.115773	0.948171
genus3	rs36081916	0.0974803	0.133531	0.465377
genus3	rs3791893	0.0628318	0.137233	0.647062
genus3	rs609430	0.0900293	0.136514	0.509584
genus3	rs672217	0.0173137	0.131289	0.895083
genus3	rs10044993	-0.299338	0.16871	0.0760176
genus3	rs13128780	-0.346053	0.185142	0.0616064
genus3	rs13249325	-0.28132	0.176635	0.111236
genus3	rs17092615	-0.353295	0.179095	0.048533
genus3	rs72759041	-0.162029	0.177552	0.361466
genus3	rs11128180	-0.0175215	0.201819	0.930816
genus3	rs12072562	-0.0671108	0.200703	0.738093
genus3	rs12673420	-0.074622	0.202075	0.711921
genus3	rs12747809	-0.0584507	0.202254	0.772584
genus3	rs12894272	-0.0412573	0.201886	0.838073
genus3	rs233486	-0.0356573	0.202099	0.859952
genus3	rs2444793	-0.0537256	0.201147	0.789395
genus3	rs2726805	-0.16671	0.201546	0.408149
genus3	rs2882478	-0.0981755	0.202733	0.628201
genus3	rs35182105	-0.0114458	0.199999	0.954363
genus3	rs6656451	0.00575882	0.201641	0.977216
genus3	rs7629954	-0.0271941	0.198756	0.891172
genus3	rs10414815	-0.127709	0.20803	0.539284
genus3	rs11192447	-0.226764	0.211877	0.284501
genus3	rs12346653	-0.168409	0.211355	0.425565
genus3	rs17730011	-0.143761	0.212916	0.499548
genus3	rs2833528	-0.206281	0.211599	0.329626
genus3	rs336138	-0.159767	0.209954	0.44668
genus3	rs4576377	-0.133174	0.211923	0.529737
genus3	rs72894957	-0.105003	0.2171	0.628625
genus3	rs74315802	-0.21771	0.216982	0.315691
genus3	rs9981767	-0.135517	0.212707	0.524054
genus3	rs1035588	0.0618529	0.105817	0.558866
genus3	rs17148768	0.0296515	0.105833	0.779345
genus3	rs2759329	0.0124846	0.1061	0.90633
genus3	rs35225860	0.0439481	0.104344	0.673622
genus3	rs61090148	0.0297291	0.105747	0.778607
genus3	rs62112538	0.0656585	0.107974	0.543123
genus3	rs72691585	-0.0187338	0.115048	0.870649
genus3	rs7540303	0.0384431	0.105807	0.716358
genus3	rs8066522	0.0357834	0.105417	0.734273
genus3	rs9460691	0.0430949	0.104878	0.681142
genus3	rs11627628	-0.125645	0.197096	0.523811
genus3	rs11990279	-0.117044	0.193219	0.544677
genus3	rs12649930	-0.122724	0.196342	0.531935
genus3	rs133832	-0.0651386	0.185786	0.725881
genus3	rs16866406	-0.0613216	0.184131	0.73911
genus3	rs16934185	-0.107588	0.197215	0.585385
genus3	rs234108	-0.150154	0.194203	0.439414
genus3	rs36095275	-0.0979511	0.194963	0.615381
genus3	rs4506202	-0.227188	0.157472	0.149098
genus3	rs61883564	-0.149817	0.193122	0.437888
genus3	rs75453768	-0.142738	0.194922	0.463995
genus3	rs761240	-0.193958	0.182739	0.288511
genus3	rs9393920	-0.0278488	0.165752	0.866572
genus3	rs10842464	-0.128158	0.120769	0.288609
genus3	rs140997932	-0.177767	0.121202	0.142457
genus3	rs145020347	-0.177222	0.122815	0.14902
genus3	rs17109926	-0.0851947	0.12276	0.487685
genus3	rs17785622	-0.117844	0.123662	0.340616
genus3	rs2081023	-0.122098	0.122546	0.319081
genus3	rs3008582	-0.136586	0.122157	0.263516
genus3	rs3801748	-0.0942027	0.121314	0.437441
genus3	rs4756632	-0.156573	0.123489	0.204829
genus3	rs4767113	-0.134182	0.122165	0.272042
genus3	rs7240324	-0.196358	0.122817	0.109867
genus3	rs9602779	-0.135061	0.123282	0.273279
genus3	rs9900242	-0.108332	0.121991	0.374525
genus3	rs10899911	0.00657433	0.147363	0.964416
genus3	rs11715853	0.0171801	0.144155	0.905134
genus3	rs2090816	-0.0759263	0.144732	0.599861
genus3	rs35055552	-0.0320872	0.152188	0.833013
genus3	rs55877868	-0.0502029	0.145793	0.730588
genus3	rs62273907	0.0274336	0.161033	0.864727
genus3	rs6809952	0.0623329	0.144051	0.665223
genus3	rs6828768	-0.00454829	0.150033	0.975816
genus3	rs7303158	-0.0278527	0.15047	0.853147
genus3	rs7311004	-0.040177	0.147943	0.785953
genus3	rs7572229	-0.0450822	0.148085	0.760797
genus3	rs78383039	-0.0527824	0.143716	0.713418
genus3	rs8039785	-0.030038	0.149809	0.841083
genus3	rs823424	0.00422731	0.148272	0.977255
genus3	rs12618201	0.210913	0.223961	0.346325
genus3	rs1264476	0.0430768	0.221941	0.846104
genus3	rs56069061	0.135476	0.219938	0.537912
genus3	rs56157888	0.060092	0.234191	0.797492
genus3	rs74540770	0.0572503	0.225049	0.799194
genus3	rs75882962	0.00862211	0.22429	0.969335
genus3	rs7982713	0.104583	0.224677	0.641587
genus3	rs111509883	0.101633	0.170853	0.551939
genus3	rs11685699	-0.0357098	0.1532	0.815689
genus3	rs117271932	-0.0671654	0.153843	0.662413
genus3	rs12648235	0.0573066	0.167131	0.731686
genus3	rs1304512	0.0393844	0.169015	0.815743
genus3	rs2104588	0.0504784	0.165159	0.759882
genus3	rs2495052	0.0881977	0.154038	0.566934
genus3	rs2683313	0.0280166	0.168687	0.868089
genus3	rs4968431	0.0245436	0.167422	0.88345
genus3	rs7237249	0.0592123	0.166472	0.722073
genus3	rs72815774	0.114875	0.15369	0.454795
genus3	rs746764	0.0379094	0.170272	0.823815
genus3	rs7976209	-0.0201685	0.153322	0.895345
genus3	rs9428102	0.0313239	0.168433	0.852466
genus3	rs9613013	0.0427838	0.167773	0.798716
genus3	rs12501673	0.0403744	0.15171	0.79014
genus3	rs17032291	0.157502	0.161438	0.329253
genus3	rs17582787	0.190247	0.147135	0.196007
genus3	rs2074881	0.103141	0.169461	0.542764
genus3	rs2900503	0.0950284	0.173938	0.584836
genus3	rs2998141	0.143394	0.167204	0.391115
genus3	rs4270579	0.0947628	0.171046	0.579566
genus3	rs4717843	-0.00133659	0.132545	0.991954
genus3	rs7712231	0.128665	0.168461	0.445004
genus3	rs80309088	0.0951475	0.17159	0.579233
genus3	rs9887954	0.105066	0.171808	0.540847
genus3	rs6082461	0.0802462	0.289765	0.781829
genus3	rs7137760	0.230606	0.292613	0.430642
genus3	rs74303178	0.0127876	0.291662	0.965029
genus3	rs78191726	0.0905004	0.291179	0.755948
genus3	rs918449	0.0752853	0.290935	0.795813
genus3	rs9522712	0.240995	0.291632	0.408595
genus3	rs9809789	0.105824	0.297351	0.721923
genus3	rs10916131	-0.14495	0.157262	0.356679
genus3	rs10927423	-0.135388	0.160418	0.398687
genus3	rs10964441	-0.0352323	0.162265	0.828109
genus3	rs113147300	-0.137134	0.159476	0.389842
genus3	rs11607472	-0.128883	0.158356	0.415712
genus3	rs116974815	-0.177271	0.166638	0.287415
genus3	rs11750293	-0.0927099	0.161148	0.565081
genus3	rs12463378	-0.08187	0.156895	0.6018
genus3	rs15256	-0.114983	0.161314	0.475978
genus3	rs55793120	-0.0479116	0.153081	0.754295
genus3	rs57079348	-0.0871022	0.154369	0.572585
genus3	rs6542556	-0.139544	0.158231	0.37783
genus3	rs6793778	-0.0880689	0.158852	0.579299
genus3	rs7120052	-0.092755	0.159797	0.561608
genus3	rs7155595	-0.177605	0.148188	0.230718
genus3	rs7249614	-0.113177	0.161438	0.483269
genus3	rs76847269	-0.0620215	0.151092	0.681449
genus3	rs77564310	-0.134722	0.161212	0.403334
genus3	rs882348	-0.14093	0.158461	0.373806
genus3	rs10904297	-0.0664541	0.309083	0.829764
genus3	rs10967781	-0.149894	0.306155	0.624416
genus3	rs12434631	-0.344884	0.306222	0.260058
genus3	rs1475330	-0.04082	0.304516	0.893364
genus3	rs35866622	0.0105504	0.321059	0.973785
genus3	rs4073731	-0.111651	0.308157	0.717113
genus3	rs77034621	-0.10356	0.299877	0.729836
genus3	rs113379006	-0.0247841	0.12041	0.836923
genus3	rs13417181	0.0602959	0.12879	0.639661
genus3	rs2016057	0.0859091	0.111191	0.439745
genus3	rs2187447	-0.0417821	0.106537	0.694923
genus3	rs2371572	-0.0233716	0.122282	0.848425
genus3	rs41816	0.0328892	0.131139	0.801972
genus3	rs4600608	0.051499	0.125455	0.68144
genus3	rs553697	0.0253745	0.131218	0.846664
genus3	rs56203279	0.0399425	0.129571	0.757879
genus3	rs10409783	0.0422404	0.199659	0.832448
genus3	rs12440440	0.135908	0.199724	0.496199
genus3	rs16894137	0.136968	0.198321	0.489793
genus3	rs35156985	0.092068	0.189685	0.627412
genus3	rs4492265	0.120244	0.198209	0.544081
genus3	rs8901	0.158114	0.199452	0.427928
genus3	rs10065321	-0.145442	0.211159	0.490962
genus3	rs10497836	-0.06232	0.208581	0.765107
genus3	rs1667315	-0.168647	0.209995	0.421915
genus3	rs2114677	-0.176988	0.218411	0.417744
genus3	rs2171249	-0.138343	0.212889	0.515798
genus3	rs3761728	-0.0584617	0.209925	0.780637
genus3	rs4347804	-0.100035	0.214491	0.640941
genus3	rs6555306	-0.0424675	0.211619	0.840949
genus3	rs75158211	-0.1583	0.211424	0.454019
genus3	rs76528319	-0.226883	0.226081	0.315597
genus3	rs1145877	-0.134899	0.183704	0.46275
genus3	rs11591622	0.000586719	0.187261	0.9975
genus3	rs13173038	-0.0128765	0.197428	0.947998
genus3	rs143438747	-0.0915105	0.204056	0.653823
genus3	rs2050185	-0.0400497	0.198776	0.840322
genus3	rs2321387	-0.0783719	0.197659	0.691736
genus3	rs2613606	0.0399048	0.184781	0.829021
genus3	rs607327	0.00455663	0.18923	0.980789
genus3	rs62501473	-0.0867217	0.197156	0.660036
genus3	rs7499539	-0.0768269	0.196294	0.695511
genus3	rs7638039	-0.0157245	0.195139	0.935775
genus3	rs9350083	-0.112695	0.186695	0.546089
genus3	rs1883097	0.116937	0.236581	0.621108
genus3	rs2569953	-0.132232	0.306638	0.666299
genus3	rs2872237	-0.298182	0.231081	0.196918
genus3	rs58405430	-0.114951	0.297648	0.69935
genus3	rs7184125	-0.0813993	0.311952	0.794143
order	rs2889192	0.155979	0.249322	0.53157
order	rs34583783	0.201644	0.232531	0.385847
order	rs35011108	0.212449	0.333002	0.523486
order	rs4073240	-0.0187583	0.242288	0.938288
order	rs10233278	-0.00453962	0.114794	0.968455
order	rs10410917	-0.00912917	0.114417	0.936405
order	rs11034576	-0.0070259	0.117974	0.95251
order	rs11207728	-0.00167401	0.113773	0.988261
order	rs11844714	-0.051291	0.114893	0.655292
order	rs1287018	-0.0335757	0.11405	0.768456
order	rs4617108	0.0209651	0.118486	0.859554
order	rs74420793	0.0279632	0.113061	0.804655
order	rs11146701	-0.391562	0.283855	0.167757
order	rs17343978	-0.27856	0.23326	0.232397
order	rs2032750	-0.426628	0.293429	0.145963
order	rs4146051	-0.482913	0.291682	0.0978001
order	rs4916508	-0.298611	0.253224	0.238304
order	rs55773148	-0.438823	0.295211	0.137154
order	rs62531359	-0.422071	0.293336	0.150188
order	rs62575403	-0.467349	0.292937	0.110625
order	rs72706335	-0.621829	0.263122	0.0181142
order	rs73975615	-0.356038	0.26964	0.186695
order	rs7631304	-0.426862	0.291286	0.142801
order	rs79585701	-0.447835	0.289277	0.121594
order	rs929878	-0.446357	0.289318	0.122881
order	rs10831953	0.0994806	0.178213	0.576699
order	rs12446429	0.0448961	0.181554	0.804686
order	rs13020688	0.0753144	0.179158	0.674208
order	rs182549	0.202782	0.207816	0.329175
order	rs4957061	0.10405	0.179716	0.56261
order	rs540489	0.0643744	0.177962	0.717554
order	rs55888705	0.0348658	0.178009	0.844716
order	rs6899771	0.0533561	0.179556	0.766348
order	rs7174549	0.131985	0.179034	0.460996
order	rs7322849	-0.0115826	0.181787	0.949197
order	rs857444	0.116437	0.179153	0.515737
order	rs1511453	-0.232507	0.221431	0.293709
order	rs1928341	-0.368885	0.224437	0.100259
order	rs2321387	-0.376524	0.224591	0.0936431
order	rs2613606	-0.221398	0.224143	0.323273
order	rs4033856	-0.403185	0.223155	0.0708015
order	rs6087811	-0.329122	0.232219	0.156398
order	rs62191117	-0.257855	0.22673	0.255422
order	rs62395635	-0.294636	0.226733	0.193776
order	rs75242906	-0.381977	0.23361	0.102027
order	rs7638039	-0.295487	0.225502	0.190077
order	rs10774377	0.0284032	0.195116	0.88426
order	rs112334273	0.00594886	0.196784	0.975883
order	rs13105690	-0.0266654	0.193824	0.890576
order	rs13179700	0.0197197	0.194114	0.919084
order	rs1842454	0.036065	0.19256	0.851431
order	rs2273429	-0.0350776	0.193095	0.85585
order	rs290772	-0.0168145	0.19162	0.930076
order	rs6442336	0.0219217	0.193865	0.909969
order	rs6814436	-0.00828861	0.195057	0.966106
order	rs6815608	0.017144	0.203987	0.933021
order	rs72738886	-0.0234876	0.193446	0.903361
order	rs72915163	-0.0734918	0.193851	0.704603
order	rs992074	0.00492777	0.204701	0.980794
order	rs11250875	-0.211574	0.205486	0.303185
order	rs11656361	-0.134447	0.209053	0.520143
order	rs12974142	-0.217993	0.202624	0.281993
order	rs13307134	-0.228184	0.203092	0.261205
order	rs1397793	-0.133388	0.203995	0.513192
order	rs1816223	-0.216558	0.204494	0.289603
order	rs240104	-0.197611	0.206862	0.339437
order	rs2442778	-0.192657	0.205986	0.349639
order	rs3025411	-0.0538212	0.207798	0.79563
order	rs34739816	-0.134095	0.203893	0.510748
order	rs67561917	-0.175541	0.207287	0.397077
order	rs719099	-0.148635	0.204312	0.466925
order	rs8010111	-0.149215	0.20801	0.473162
order	rs11599763	0.150703	0.240715	0.531273
order	rs17791387	0.0962424	0.237558	0.68538
order	rs186073	0.152463	0.238806	0.523189
order	rs2838334	0.0224081	0.226474	0.921183
order	rs3935584	0.273128	0.225505	0.225825
order	rs4506934	0.0470188	0.239838	0.844576
order	rs6058181	0.170207	0.242466	0.482689
order	rs62020470	0.035951	0.222103	0.871411
order	rs72647048	0.0946953	0.240374	0.693618
order	rs9928243	0.0965661	0.243467	0.691641
order	rs11026530	0.220602	0.269744	0.41346
order	rs2374342	0.239184	0.26889	0.373722
order	rs35673018	0.234949	0.264225	0.373895
order	rs504442	0.264913	0.264074	0.315775
order	rs62210023	0.212597	0.269274	0.429808
order	rs78143293	0.0775776	0.267364	0.771696
order	rs79757635	0.0426017	0.26394	0.871773
order	rs1074800	-0.317812	0.214384	0.138224
order	rs10781552	-0.375781	0.214755	0.0801513
order	rs17530232	-0.445177	0.213498	0.037055
order	rs1884466	-0.333347	0.213909	0.119149
order	rs2300774	-0.373551	0.215775	0.0834149
order	rs290833	-0.376915	0.214723	0.0791984
order	rs35161940	-0.320916	0.214801	0.135172
order	rs4078432	-0.355824	0.213387	0.0954147
order	rs56970041	-0.317902	0.210092	0.130241
order	rs62504403	-0.344629	0.216538	0.111488
order	rs7234058	-0.31447	0.216746	0.146817
order	rs7826267	-0.38516	0.211837	0.069035
order	rs8003149	-0.304341	0.215227	0.157349
order	rs11150282	-0.157109	0.148952	0.291533
order	rs113884518	0.0537667	0.168751	0.750018
order	rs28678345	-0.0500093	0.198535	0.801125
order	rs367480	-0.00142497	0.199468	0.9943
order	rs4129395	-0.0159224	0.202608	0.937361
order	rs789069	-0.0213744	0.19739	0.913769
order	rs79790072	-0.0346642	0.196969	0.860303
order	rs8028558	0.038874	0.190177	0.838033
order	rs9864379	0.0890894	0.193242	0.644781
order	rs11110282	-0.00729585	0.181809	0.96799
order	rs11627423	0.0309241	0.182706	0.865595
order	rs11730038	-0.0376904	0.184332	0.837986
order	rs12797734	-0.00123524	0.182963	0.994613
order	rs1595463	-0.0537508	0.182569	0.768443
order	rs2370083	-0.0184341	0.180902	0.918835
order	rs2952251	-0.0488904	0.182769	0.789085
order	rs34989881	0.0399041	0.182709	0.827116
order	rs35344081	-0.076048	0.184857	0.680787
order	rs4028634	0.0513252	0.183481	0.779684
order	rs57872228	0.0403435	0.181864	0.824444
order	rs74663707	0.0300917	0.182754	0.869214
order	rs77558518	-0.0103835	0.186529	0.955607
order	rs78938557	-0.0208149	0.18024	0.908061
order	rs9581006	0.0189212	0.195677	0.922968
order	rs10202904	0.136916	0.123294	0.266787
order	rs10424197	0.181109	0.119791	0.130567
order	rs4257531	0.20776	0.120335	0.084256
order	rs6508769	0.179903	0.121564	0.138898
order	rs6776814	0.183471	0.115908	0.113445
order	rs73068003	0.160285	0.119437	0.179593
order	rs73457410	0.155634	0.121103	0.198744
order	rs75208022	0.24292	0.125865	0.053606
order	rs894996	0.174637	0.121946	0.15212
order	rs11779863	-0.0496676	0.185269	0.788635
order	rs12566890	-0.0742818	0.183247	0.68521
order	rs13100746	-0.0377635	0.191747	0.843871
order	rs17235252	-0.040322	0.196947	0.837779
order	rs3932485	0.0854732	0.1618	0.597315
order	rs515984	-0.0321716	0.190266	0.865728
order	rs638542	-0.0236969	0.194068	0.902815
order	rs74603314	-0.0088301	0.203462	0.965383
order	rs7706512	0.0591991	0.180567	0.743024
order	rs7801843	0.0395291	0.186338	0.832
order	rs7853673	0.0472931	0.183333	0.796435
order	rs949341	-0.0634032	0.18101	0.726133
order	rs11251024	-0.185913	0.138146	0.178377
order	rs11606187	-0.187872	0.140485	0.181122
order	rs13385922	-0.214362	0.130841	0.101352
order	rs166849	-0.112132	0.117095	0.338259
order	rs2172426	-0.161286	0.138803	0.245246
order	rs267959	-0.151936	0.135183	0.261043
order	rs4383094	-0.193329	0.139143	0.164704
order	rs60775321	-0.157541	0.136147	0.247217
order	rs72671304	-0.234386	0.12148	0.0536794
order	rs7911787	-0.119793	0.115109	0.298019
order	rs8126061	-0.201328	0.138295	0.14545
order	rs9542068	-0.198669	0.136545	0.145676
order	rs10965428	0.184205	0.127586	0.148806
order	rs111582866	0.159397	0.13884	0.250945
order	rs12050685	0.143415	0.139223	0.302956
order	rs16970009	0.101465	0.127397	0.425772
order	rs4822728	0.111305	0.132598	0.401233
order	rs6972479	0.181315	0.131816	0.168971
order	rs72756943	0.17197	0.137082	0.209658
order	rs73139353	0.16079	0.151193	0.287566
order	rs76022354	0.188655	0.142718	0.186211
order	rs78909003	0.175043	0.14577	0.229824
order	rs9382510	0.118885	0.137873	0.388534
order	rs9895850	0.129763	0.139084	0.350826
order	rs9938097	0.101554	0.129	0.431143
order	rs1035406	0.119328	0.132262	0.366947
order	rs11591293	0.188757	0.131984	0.152673
order	rs11630875	0.160752	0.131606	0.22191
order	rs13336560	0.0829903	0.131553	0.528137
order	rs1549633	0.146372	0.132693	0.269989
order	rs3730086	0.163232	0.132203	0.216939
order	rs3754624	0.125607	0.132052	0.341504
order	rs4278423	0.147942	0.131387	0.260163
order	rs55876211	0.155359	0.133954	0.246133
order	rs61933850	0.241711	0.138975	0.0819923
order	rs7001029	0.130869	0.131837	0.320874
order	rs76784716	0.195785	0.134067	0.144195
order	rs77304857	0.111482	0.132986	0.401865
order	rs9813022	0.114292	0.133215	0.390918
order	rs1135612	0.456985	0.340122	0.179081
order	rs13086907	0.27017	0.350618	0.440972
order	rs1643968	0.438426	0.359096	0.222118
order	rs1649999	0.206703	0.300694	0.491818
order	rs2834062	0.254366	0.332804	0.444683
order	rs4463806	0.344066	0.358218	0.336808
order	rs4722181	0.519553	0.322159	0.106805
order	rs60274479	0.435587	0.357671	0.223284
order	rs61249479	0.369667	0.368016	0.315145
order	rs71405394	0.264229	0.356009	0.457967
order	rs73232831	0.378327	0.367354	0.30307
order	rs9423647	0.452246	0.347815	0.193515
order	rs111862613	0.463766	0.181325	0.0105382
order	rs117107102	0.487931	0.188965	0.00981948
order	rs11729256	0.406845	0.178163	0.0223978
order	rs12908520	0.494762	0.179426	0.005825
order	rs2602429	0.464237	0.180625	0.010165
order	rs4242783	0.541352	0.17956	0.00257079
order	rs4936098	0.471653	0.17963	0.00864733
order	rs61779207	0.524914	0.179884	0.00352208
order	rs74542928	0.515981	0.176291	0.00342394
order	rs9349825	0.416729	0.177829	0.0191079
order	rs941682	0.39713	0.178158	0.0258081
order	rs1002941	-0.0787329	0.138772	0.570473
order	rs11770843	0.000758515	0.141184	0.995713
order	rs17114848	-0.0127371	0.138775	0.926871
order	rs2031282	-0.0418014	0.139083	0.763758
order	rs2825714	-0.106281	0.141228	0.45172
order	rs62570196	-0.0314005	0.137994	0.819996
order	rs72640280	-0.124788	0.140941	0.375944
order	rs77599476	-0.0161823	0.141969	0.90925
phylum	rs11766971	-0.125145	0.191971	0.514467
phylum	rs12528285	-0.197637	0.192817	0.305364
phylum	rs13192624	-0.237476	0.191341	0.214564
phylum	rs1397793	-0.115577	0.191971	0.547137
phylum	rs4429415	-0.0686634	0.195093	0.724875
phylum	rs55888705	-0.218085	0.192182	0.256466
phylum	rs6496870	-0.10918	0.192411	0.570421
phylum	rs6743026	-0.0944669	0.191714	0.622189
phylum	rs74037001	-0.171172	0.191761	0.372053
phylum	rs75211493	-0.139103	0.191952	0.46865
phylum	rs7570971	-0.180917	0.208014	0.384443
phylum	rs80124826	-0.125978	0.190323	0.508024
phylum	rs857444	-0.128194	0.192392	0.505208
phylum	rs9833771	-0.183807	0.192333	0.339238
phylum	rs17343978	-0.0602178	0.230225	0.79366
phylum	rs2032750	-0.242614	0.334796	0.468659
phylum	rs62531359	-0.237072	0.334216	0.478116
phylum	rs62575403	-0.292617	0.338608	0.387491
phylum	rs6586324	-0.329544	0.319844	0.302857
phylum	rs72706335	-0.474621	0.303412	0.117753
phylum	rs73512608	-0.25484	0.338658	0.45175
phylum	rs73846128	-0.2467	0.332564	0.4582
phylum	rs73975615	-0.164186	0.292563	0.574662
phylum	rs929878	-0.270679	0.330023	0.412112
phylum	rs12555298	-0.0607903	0.185332	0.742906
phylum	rs2585223	-0.151607	0.16704	0.364086
phylum	rs584122	0.00635323	0.179995	0.971843
phylum	rs61972390	0.0171231	0.176702	0.922803
phylum	rs7148504	-0.038355	0.190036	0.84005
phylum	rs76531781	-0.0595759	0.192914	0.757458
phylum	rs789068	-0.0525432	0.188583	0.780535
phylum	rs9864379	0.0727361	0.175599	0.678716
phylum	rs10202904	-0.0152306	0.105702	0.88543
phylum	rs11022995	0.0208905	0.104684	0.841827
phylum	rs34928225	0.103806	0.105931	0.327114
phylum	rs45498998	0.049147	0.103991	0.636492
phylum	rs6064552	0.038207	0.104008	0.713361
phylum	rs6508769	0.0177185	0.104993	0.865987
phylum	rs7015093	0.0516698	0.104726	0.621744
phylum	rs76029318	-0.00317405	0.104825	0.975844
phylum	rs7635189	0.0469668	0.105007	0.654677
phylum	rs77658038	0.0345471	0.107502	0.747937
phylum	rs894996	0.0139886	0.104775	0.893789
phylum	rs112334273	0.297079	0.17475	0.0891264
phylum	rs2273429	0.256782	0.172134	0.135762
phylum	rs2332027	0.249165	0.172791	0.149302
phylum	rs2547978	0.270619	0.172491	0.116674
phylum	rs3792064	0.294966	0.171674	0.0857655
phylum	rs3852931	0.2467	0.17262	0.15296
phylum	rs4750583	0.202254	0.173069	0.242551
phylum	rs56199908	0.300116	0.183129	0.101251
phylum	rs6814436	0.280181	0.172919	0.105167
phylum	rs6815608	0.313589	0.177633	0.0775007
phylum	rs7247191	0.209523	0.172073	0.223362
phylum	rs72738886	0.266807	0.172634	0.122223
phylum	rs72771021	0.272932	0.17875	0.126788
phylum	rs8085381	0.273782	0.173447	0.114456
phylum	rs992074	0.307857	0.178361	0.0843412
phylum	rs1002941	-0.0477217	0.129364	0.712207
phylum	rs11770843	0.0236526	0.131364	0.857111
phylum	rs17114848	0.00912736	0.128713	0.943467
phylum	rs2031282	-0.0151492	0.129037	0.906541
phylum	rs2825714	-0.0700809	0.13109	0.592925
phylum	rs60995569	-0.0503778	0.130572	0.699627
phylum	rs62570196	-0.00625736	0.128436	0.961143
phylum	rs72640280	-0.0857728	0.130749	0.511818
phylum	rs77599476	0.00793416	0.131544	0.951904
phylum	rs10750258	-0.236493	0.203681	0.245603
phylum	rs11126162	-0.183834	0.202265	0.363414
[truncated: 34 more rows]
