# Supplementary material for: Investigating the Causal Relationship of Gut Microbiota with Psoriasis and Psoriatic Arthritis: A Bidirectional Two-Sample Mendelian Randomization Study.
Source: Preprints.org preprint supplement (doi:10.20944/preprints202306.1726.v1), 2023-06-25
Supplement: Supplementary file 8 [file Supplementary Table 6_Reverse_P.xlsx]

## Sheet: Supplementary Table 6_Reverse_P
Exposure	Outcome and outcome id	method	nsnp	b	se	pval
PSORIASIS	genus Eubacterium fissicatena group id.14373) || id:ebi-a-GCST90016999	Inverse variance weighted (fixed effects)	29	0.0226834	0.0265097	0.392185
PSORIASIS	genus Eubacterium fissicatena group id.14373) || id:ebi-a-GCST90016999	MR Egger	29	0.0140542	0.0496679	0.779362
PSORIASIS	genus Eubacterium fissicatena group id.14373) || id:ebi-a-GCST90016999	Weighted median	29	0.00656858	0.0363109	0.856447
PSORIASIS	genus Eubacterium fissicatena group id.14373) || id:ebi-a-GCST90016999	Weighted mode	29	0.0187882	0.0342134	0.587257
PSORIASIS	genus Alloprevotella id.961) || id:ebi-a-GCST90016964	Inverse variance weighted (multiplicative random effects)	14	-0.0125602	0.0787062	0.873209
PSORIASIS	genus Alloprevotella id.961) || id:ebi-a-GCST90016964	MR Egger	14	-0.328932	0.27033	0.247078
PSORIASIS	genus Alloprevotella id.961) || id:ebi-a-GCST90016964	Weighted median	14	-0.12454	0.0818884	0.128298
PSORIASIS	genus Alloprevotella id.961) || id:ebi-a-GCST90016964	Weighted mode	14	-0.20781	0.109232	0.0794944
PSORIASIS	genus Lactococcus id.1851) || id:ebi-a-GCST90017031	Inverse variance weighted (fixed effects)	29	0.0099691	0.0257101	0.698201
PSORIASIS	genus Lactococcus id.1851) || id:ebi-a-GCST90017031	MR Egger	29	0.00172903	0.0409384	0.966622
PSORIASIS	genus Lactococcus id.1851) || id:ebi-a-GCST90017031	Weighted median	29	-0.000930402	0.0348513	0.978702
PSORIASIS	genus Lactococcus id.1851) || id:ebi-a-GCST90017031	Weighted mode	29	4.88686e-05	0.036017	0.998927
PSORIASIS	genus Odoribacter id.952) || id:ebi-a-GCST90017034	Inverse variance weighted (fixed effects)	31	-0.0133181	0.0133658	0.319041
PSORIASIS	genus Odoribacter id.952) || id:ebi-a-GCST90017034	MR Egger	31	-0.0159519	0.0218788	0.471786
PSORIASIS	genus Odoribacter id.952) || id:ebi-a-GCST90017034	Weighted median	31	-0.0203897	0.0179228	0.255271
PSORIASIS	genus Odoribacter id.952) || id:ebi-a-GCST90017034	Weighted mode	31	-0.0201199	0.0174213	0.257247
PSORIASIS	genus Ruminiclostridium5 id.11355) || id:ebi-a-GCST90017049	Inverse variance weighted (fixed effects)	31	-0.00669372	0.0122927	0.586077
PSORIASIS	genus Ruminiclostridium5 id.11355) || id:ebi-a-GCST90017049	MR Egger	31	-0.0113515	0.0196754	0.568432
PSORIASIS	genus Ruminiclostridium5 id.11355) || id:ebi-a-GCST90017049	Weighted median	31	-0.0136461	0.0168772	0.418772
PSORIASIS	genus Ruminiclostridium5 id.11355) || id:ebi-a-GCST90017049	Weighted mode	31	-0.0151139	0.0173294	0.390052
