# Supplementary material for: Investigating the Causal Relationship of Gut Microbiota with Psoriasis and Psoriatic Arthritis: A Bidirectional Two-Sample Mendelian Randomization Study.
Source: Preprints.org preprint supplement (doi:10.20944/preprints202306.1726.v1), 2023-06-25
Supplement: Supplementary file 9 [file Supplementary Table 7_Reverse_P.xlsx]

## Sheet: Supplementary Table 7_Reverse_P
exposure	Outcome and outcome id	method	nsnp	b	se	pval
Psoriatic Arthritis	order Verrucomicrobiales id.4030) || id:ebi-a-GCST90017108	Inverse variance weighted (fixed effects)	11	0.00465373	0.0214477	0.828224
Psoriatic Arthritis	order Verrucomicrobiales id.4030) || id:ebi-a-GCST90017108	MR Egger	11	0.0403749	0.0970237	0.687059
Psoriatic Arthritis	order Verrucomicrobiales id.4030) || id:ebi-a-GCST90017108	Weighted median	11	0.0131808	0.0294467	0.654432
Psoriatic Arthritis	order Verrucomicrobiales id.4030) || id:ebi-a-GCST90017108	Weighted mode	11	0.0246186	0.0385608	0.537536
Psoriatic Arthritis	genus Akkermansia id.4037) || id:ebi-a-GCST90016961	Inverse variance weighted (fixed effects)	11	0.00442288	0.0214486	0.836628
Psoriatic Arthritis	genus Akkermansia id.4037) || id:ebi-a-GCST90016961	MR Egger	11	0.040952	0.0965601	0.681443
Psoriatic Arthritis	genus Akkermansia id.4037) || id:ebi-a-GCST90016961	Weighted median	11	0.0131661	0.0292185	0.652271
Psoriatic Arthritis	genus Akkermansia id.4037) || id:ebi-a-GCST90016961	Weighted mode	11	0.0245626	0.0401172	0.554024
Psoriatic Arthritis	genus Coprococcus1 id.11301) || id:ebi-a-GCST90016983	Inverse variance weighted (fixed effects)	11	0.0027571	0.0180828	0.878816
Psoriatic Arthritis	genus Coprococcus1 id.11301) || id:ebi-a-GCST90016983	MR Egger	11	0.0325203	0.0780167	0.686563
Psoriatic Arthritis	genus Coprococcus1 id.11301) || id:ebi-a-GCST90016983	Weighted median	11	0.0368843	0.0245382	0.132803
Psoriatic Arthritis	genus Coprococcus1 id.11301) || id:ebi-a-GCST90016983	Weighted mode	11	0.0422682	0.0299892	0.189035
Psoriatic Arthritis	genus Lachnospiraceae ND3007 group id.11317) || id:ebi-a-GCST90017023	Inverse variance weighted (fixed effects)	11	-0.0151819	0.0189142	0.422165
Psoriatic Arthritis	genus Lachnospiraceae ND3007 group id.11317) || id:ebi-a-GCST90017023	MR Egger	11	0.0184283	0.0788776	0.820499
Psoriatic Arthritis	genus Lachnospiraceae ND3007 group id.11317) || id:ebi-a-GCST90017023	Weighted median	11	0.00276322	0.0265175	0.917008
Psoriatic Arthritis	genus Lachnospiraceae ND3007 group id.11317) || id:ebi-a-GCST90017023	Weighted mode	11	0.0113305	0.0325126	0.734694
Psoriatic Arthritis	genus Lactococcus id.1851) || id:ebi-a-GCST90017031	Inverse variance weighted (fixed effects)	9	0.0177077	0.0385145	0.645684
Psoriatic Arthritis	genus Lactococcus id.1851) || id:ebi-a-GCST90017031	MR Egger	9	0.0481008	0.187292	0.804701
Psoriatic Arthritis	genus Lactococcus id.1851) || id:ebi-a-GCST90017031	Weighted median	9	0.0378263	0.0517912	0.465169
Psoriatic Arthritis	genus Lactococcus id.1851) || id:ebi-a-GCST90017031	Weighted mode	9	0.0373154	0.0653607	0.583734
Psoriatic Arthritis	genus Odoribacter id.952) || id:ebi-a-GCST90017034	Inverse variance weighted (fixed effects)	11	0.0157345	0.0192773	0.414376
Psoriatic Arthritis	genus Odoribacter id.952) || id:ebi-a-GCST90017034	MR Egger	11	0.0647036	0.0799585	0.43926
Psoriatic Arthritis	genus Odoribacter id.952) || id:ebi-a-GCST90017034	Weighted median	11	0.024828	0.0258009	0.335903
Psoriatic Arthritis	genus Odoribacter id.952) || id:ebi-a-GCST90017034	Weighted mode	11	0.0360865	0.0346197	0.321785
Psoriatic Arthritis	family Rikenellaceae id.967) || id:ebi-a-GCST90016950	Inverse variance weighted (fixed effects)	11	0.0125613	0.0175892	0.475135
Psoriatic Arthritis	family Rikenellaceae id.967) || id:ebi-a-GCST90016950	MR Egger	11	0.00628684	0.0730753	0.933324
Psoriatic Arthritis	family Rikenellaceae id.967) || id:ebi-a-GCST90016950	Weighted median	11	0.0143663	0.0230173	0.532526
Psoriatic Arthritis	family Rikenellaceae id.967) || id:ebi-a-GCST90016950	Weighted mode	11	0.0125691	0.0301975	0.686035
Psoriatic Arthritis	family Verrucomicrobiaceae id.4036) || id:ebi-a-GCST90016957	Inverse variance weighted (fixed effects)	11	0.00453093	0.0214477	0.832688
Psoriatic Arthritis	family Verrucomicrobiaceae id.4036) || id:ebi-a-GCST90016957	MR Egger	11	0.0402595	0.0968634	0.687414
Psoriatic Arthritis	family Verrucomicrobiaceae id.4036) || id:ebi-a-GCST90016957	Weighted median	11	0.0132534	0.0297077	0.655505
Psoriatic Arthritis	family Verrucomicrobiaceae id.4036) || id:ebi-a-GCST90016957	Weighted mode	11	0.0246804	0.0378776	0.52936
Psoriatic Arthritis	genus Clostridium innocuum group id.14397) || id:ebi-a-GCST90016979	Inverse variance weighted (fixed effects)	9	0.0278271	0.037884	0.462623
Psoriatic Arthritis	genus Clostridium innocuum group id.14397) || id:ebi-a-GCST90016979	MR Egger	9	-0.168021	0.183755	0.390926
Psoriatic Arthritis	genus Clostridium innocuum group id.14397) || id:ebi-a-GCST90016979	Weighted median	9	0.0593029	0.0486852	0.22319
Psoriatic Arthritis	genus Clostridium innocuum group id.14397) || id:ebi-a-GCST90016979	Weighted mode	9	0.0925544	0.0681365	0.21141
Psoriatic Arthritis	genus Marvinbryantia id.2005) || id:ebi-a-GCST90017032	Inverse variance weighted (fixed effects)	11	-0.0439944	0.0214414	0.0401847
Psoriatic Arthritis	genus Marvinbryantia id.2005) || id:ebi-a-GCST90017032	MR Egger	11	0.0177995	0.0899444	0.847525
Psoriatic Arthritis	genus Marvinbryantia id.2005) || id:ebi-a-GCST90017032	Weighted median	11	-0.0312972	0.0290074	0.280615
Psoriatic Arthritis	genus Marvinbryantia id.2005) || id:ebi-a-GCST90017032	Weighted mode	11	-0.014786	0.037889	0.704539
Psoriatic Arthritis	class Verrucomicrobiae id.4029) || id:ebi-a-GCST90016923	Inverse variance weighted (fixed effects)	11	0.00465373	0.0214477	0.828224
Psoriatic Arthritis	class Verrucomicrobiae id.4029) || id:ebi-a-GCST90016923	MR Egger	11	0.0403749	0.0970237	0.687059
Psoriatic Arthritis	class Verrucomicrobiae id.4029) || id:ebi-a-GCST90016923	Weighted median	11	0.0131808	0.0294355	0.654309
Psoriatic Arthritis	class Verrucomicrobiae id.4029) || id:ebi-a-GCST90016923	Weighted mode	11	0.0246186	0.0399682	0.551686
